# Supplementary material for: Ruthenium-catalyzed selective N,N-diallylation- and N,N,O-triallylation of free amino acids
Source: Royal Society of Chemistry journal article supplement (doi:10.1039/b911097f), 2009-01-01

**Ruthenium – catalyzed selective *N,N*-diallylation- and *N,N,O*-triallylation  
of free amino acids**

Basker Sundararaju, Mathieu Achard, G. V. M. Sharma, Christian Bruneau\*

e-mail: christian.bruneau@univ-rennes1.fr

*UMR 6226 : CNRS - Université de Rennes 1, Sciences Chimiques-Catalyse et  
Organométalliques, Campus de Beaulieu-35042 Rennes Cedex, France*

**SUPPORTING INFORMATION**

Experimental details for compounds **3-4** and NMR spectra are available free of charge via internet

at: <http://>

All reactions were carried out under argon atmosphere. Dichloromethane was distilled after drying according to conventional methods and HPLC grade methanol was used as received and stored under a nitrogen atmosphere.  $^1\text{H}$  NMR spectra were recorded on a Bruker GPX (200.131 MHz) spectrometer.  $^1\text{H}$  NMR assignment abbreviations are the following: singlet (s), doublet (d), triplet (t), quartet (q), broad singlet (bs), doublet of doublets (dd), doublet of triplets (dt), and multiplet (m).  $^{13}\text{C}$  NMR spectra were recorded at 50.32, 75.0 MHz spectrometer and reported in ppm from  $\text{CDCl}_3$ ,  $\text{CD}_3\text{OD}$ ,  $\text{dmsO-d}_6$ , as an internal standard (77.0, 49.0, 39.4 ppm for  $^{13}\text{C}$ ). Infra red spectra were obtained as nujol mulls with a Bruker IFS28 FT-IR infrared spectrophotometer (4000-400  $\text{cm}^{-1}$ ). Melting points were determined on a Kofler Bank and HRMS were recorded on Varian MAT 311 mass spectrometer with EI source or on ZAB Spec TOF with ESI source.

#### **General procedure for the preparation of diallylated compounds**

$[\text{Ru}(\text{Cp}^*)(\text{CH}_3\text{CN})_3][\text{PF}_6]$  ( $5.0 \times 10^{-3}$  mmol, 5 mol %) complex **I** was added to the mixture of amino acid **1** (0.1 mmol) in MeOH (4 mL) under inert atmosphere and the resulting solution was stirred at room temperature for two min. Then potassium carbonate (0.12 mmol), allyl chloride **2a** (0.22 mmol) were successively added and the resulting mixture was stirred at room temperature for 16 h. The crude mixture obtained after filtration and concentration in vacuo was acidified with 1 N HCl (pH~2) and then extracted with EtOAc (5 x 3ml) to afford compound **3** after drying over  $\text{Na}_2\text{SO}_4$  and evaporation.

#### **General procedure for the preparation of triallylated compounds**

$[\text{Ru}(\text{Cp}^*)(\text{CH}_3\text{CN})_3][\text{PF}_6]$  ( $5.0 \times 10^{-3}$  mmol, 5 mol %) complex **I** was added to the mixture of amino acid **1** (0.1 mmol) in  $\text{CH}_2\text{Cl}_2$  (6 mL) under inert atmosphere and the resulting solution was stirred at room temperature for two minutes. Then cesium carbonate (0.3 mmol), allyl chloride **2a** (0.33 mmol) were successively added and the resulting mixture was stirred at room temperature for 16 h. The crude mixture obtained after filtration on a short pad of silica using dichloromethane as eluent and concentration in vacuo was purified by flash chromatography (silica gel) to afford **4**.

## Double allylation of free amino acids

(2*S*)-(diprop-2-en-1-ylamino)phenylethanoic acid **3a**

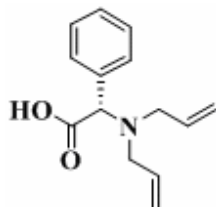

Compound **3a** was obtained as a pale yellow powder, 114.7 mg, yield = 75%,  $[\alpha]_D^{20} + 123.7$ , ( $c = 0.4$ ,  $\text{CH}_2\text{Cl}_2$ )  $^1\text{H NMR}$  (200 MHz,  $\text{DMSO}-d_6$ )  $\delta$  7.45 – 7.27 (m, 5H), 5.89 – 5.69 (m, 2H), 5.20 – 5.09 (m, 4H), 4.42 (s, 1H), 3.26 – 3.04 (m, 4H);  $^{13}\text{C NMR}$  (75 MHz,  $\text{D}_2\text{O}$ )  $\delta$  172.7, 137.2, 135.2, 128.5, 128.2, 127.6, 117.7, 67.8, 52.5; HRMS calculated for  $\text{C}_{14}\text{H}_{18}\text{NO}_2^+ [\text{M}+\text{H}]^+$ : 232.1338, found 232.1336.

(2*S*)-2-(diprop-2-en-1-ylamino)-3-phenylpropanoic acid **3b**

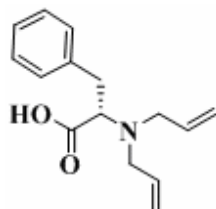

Compound **3b** was obtained as a pale yellow powder, 130.2 mg, yield = 88%,  $[\alpha]_D^{20} -5.71$ , ( $c = 0.47$ ,  $\text{CH}_2\text{Cl}_2$ )  $^1\text{H NMR}$  (200 MHz,  $\text{DMSO}-d_6$ )  $\delta$  7.33 – 7.09 (m, 5H), 5.33 – 5.49 (m, 2H), 5.19 – 4.98 (m, 4H), 3.51 (t,  $J = 6.9$  Hz, 1H), 3.39 – 3.22 (dd,  $J = 4.3, 14.2$  Hz, 2H), 3.18 – 2.72 (m, 4H);  $^{13}\text{C NMR}$  (75 MHz,  $\text{DMSO}-d_6$ )  $\delta$  173.6, 138.9, 136.5, 129.1, 127.8, 125.8, 116.7, 63.3, 52.8, 34.8; HRMS calculated for  $\text{C}_{15}\text{H}_{20}\text{NO}_2^+ [\text{M}+\text{H}]^+$ : 246.1498, found 245.1496.

(2*S*)-2-(diprop-2-en-1-ylamino)-3-methylbutanoic acid **3c**

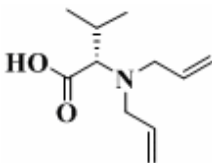

Compound **3c** was obtained as a pale yellow powder, 67.8 mg, yield = 40%,  $[\alpha]_D^{20}$  -35.33, ( $c = 0.6$ ,  $\text{CH}_2\text{Cl}_2$ ),  $^1\text{H NMR}$  (200 MHz,  $\text{DMSO} - d_6$ )  $\delta$  5.88 – 5.61 (m, 2H), 5.25 – 5.04 (m, 4H), 3.40 – 3.24 (m, 2H), 3.04 (dd,  $J = 7.6, 15.0$  Hz, 3H), 2.0 – 1.82 (m, 1H), 0.90 (d,  $J = 6.5$ , Hz, 3H), 0.82 (d,  $J = 6.2$  Hz, 3H);  $^{13}\text{C NMR}$  (75 MHz,  $\text{D}_2\text{O}$ )  $\delta$  171.2, 127.3, 125.4, 65.3, 50.0, 29.5, 18.4, 17.2; HRMS calculated for  $\text{C}_{11}\text{H}_{20}\text{NO}_2^+$   $[\text{M}+\text{H}]^+$ : 198.1494, found 198.1497.

(2*S*)-2-(diprop-2-en-1-ylamino)-4-methylpentanoic acid **3d**

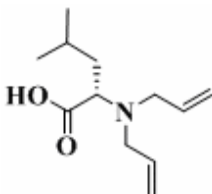

Compound **3d** was obtained as a pale white powder, 96.6 mg, yield = 60%,  $[\alpha]_D^{20}$  -17.68, ( $c = 1.4$ ,  $\text{CH}_2\text{Cl}_2$ ),  $^1\text{H NMR}$  (200 MHz,  $\text{DMSO} - d_6$ )  $\delta$  5.84 – 5.64 (m, 2H), 5.25 – 5.03 (m, 4H), 3.39 – 3.22 (m, 3H), 3.11 – 2.97 (dd,  $J = 7.6, 15.0$  Hz, 2H), 1.77 – 1.32 (m, 3H), 0.85 (t,  $J = 5.8$  Hz, 6H);  $^{13}\text{C NMR}$  (75 MHz,  $\text{DMSO} - d_6$ )  $\delta$  174.2, 136.7, 116.6, 59.2, 52.8, 37.9, 24.0, 22.7, 21.6; mp = 167°C, HRMS calculated for  $\text{C}_{12}\text{H}_{22}\text{NO}_2^+$   $[\text{M}+\text{H}]^+$ : 212.1650, found 212.1646.

(2*S*)- (diprop-2-en-1-ylamino)acetic acid **3e**

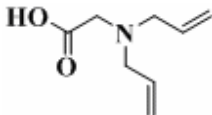

Compound **3e** was obtained as a pale yellow powder, 190 mg, yield = 92%,  $^1\text{H NMR}$  (200 MHz,  $\text{CD}_3\text{OD}$ )  $\delta$  6.12 - 5.91 (m, 2H), 5.67 – 5.54 (m, 4H), 3.84 (d,  $J$ = 6.9 Hz, 4H), 3.65 (s, 2H);  $^{13}\text{C NMR}$  (75 MHz,  $\text{CD}_3\text{OD}$ )  $\delta$  170.6, 128.9, 125.8, 57.5, 55.5; HRMS calculated for  $\text{C}_8\text{H}_{14}\text{NO}_2^+ [\text{M}+\text{H}]^+$ : 156.1025, found 156.1023.

(2*S*) {di[(2*E*)-3-phenylprop-2-en-1-yl]amino} phenyl ethanoic acid **3f**

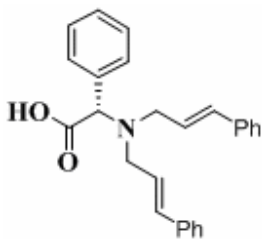

Compound **3f** was obtained as a pale yellow powder, 205.4 mg, yield = 88%,  $[\alpha]_{\text{D}}^{20}$  +121.4, ( $c$  = 0.42,  $\text{CH}_2\text{Cl}_2$ ),  $^1\text{H NMR}$  (200 MHz,  $\text{CD}_3\text{OD}$ )  $\delta$  7.74 – 7.24 (m, 15H), 6.81 (d,  $J$ = 15.7 Hz, 2H), 6.48 – 6.26 (m, 2H), 5.20 (s, 1H), 4.18 – 3.67 (m, 4H);  $^{13}\text{C NMR}$  (75 MHz,  $\text{CD}_3\text{OD}$ )  $\delta$  178.0, 141.8, 140.1, 136.6, 131.9, 131.4, 130.1, 129.8, 128.1, 118.9, 117.3, 70.6, 55.6; HRMS calculated for  $\text{C}_{26}\text{H}_{26}\text{NO}_2^+ [\text{M}+\text{H}]^+$ : 384.1964, found 384.1966.

(2*S*)-2- $\{di[(E,E)$ -3-phenylprop-2-en-1-yl]amino $\}$ -3-methyl butanoic acid **3g**

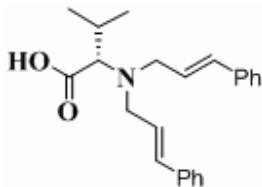

Compound **3g** was obtained as a pale white powder, 199.8 mg, yield = 67%,  $[\alpha]_D^{20}$  -33.6, ( $c = 0.5$ ,  $\text{CH}_2\text{Cl}_2$ ),  $^1\text{H}$  NMR (200 MHz,  $\text{CDCl}_3$ )  $\delta$  9.05 (bs, 1H), 7.48 – 7.16 (10H, m), 6.64 (d,  $J = 15.7$  Hz, 2H), 6.36 – 6.17 (m, 2H), 3.75 (dd,  $J = 4.7, 14.2$  Hz, 2H), 3.55 – 3.34 (m, 3H), 2.32 – 2.13 (m, 1H), 1.17 (d,  $J = 6.2$  Hz, 3H), 1.04 (d,  $J = 6.2$  Hz, 3H);  $^{13}\text{C}$  NMR (75 MHz,  $\text{CD}_3\text{OD}$ )  $\delta$  180.2, 138.9, 132.5, 130.6, 129.4, 128.0, 127.2, 75.2, 54.4, 28.9, 20.8, 20.7; HRMS calculated for  $\text{C}_{23}\text{H}_{28}\text{NO}_2^+ [\text{M}+\text{H}]^+$ : 350.2120, found 350.2124.

(2*S*)-2- $\{di[(2E)$ -3-phenylprop-2-en-1-yl]amino $\}$ -4-methyl pentanoic acid **3h**

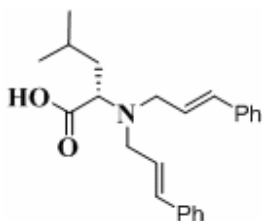

Compound **3h** was obtained as a pale white powder, 218.9 mg, yield = 79%,  $[\alpha]_D^{20}$  -46.7, ( $c = 0.4$ ,  $\text{CH}_2\text{Cl}_2$ ),  $^1\text{H}$  NMR (200 MHz,  $\text{DMSO} - d_6$ )  $\delta$  7.41 (d,  $J = 6.9$  Hz, 4H), 7.36 – 7.16 (m, 6H), 6.55 (d,  $J = 16.1$  Hz, 2H), 6.33 – 6.17 (m, 2H), 3.57 – 3.23 (m, 5H), 1.86 – 1.37 (m, 3H), 0.854 (t,  $J = 6.9$  Hz, 6H);  $^{13}\text{C}$  NMR (75 MHz,  $\text{DMSO} - d_6$ )  $\delta$  174.5, 136.7, 131.2, 128.5, 128.4, 127.1, 126.0, 59.6, 52.4, 38.1, 24.0, 22.8, 21.5; mp = 174° C. HRMS calculated for  $\text{C}_{24}\text{H}_{30}\text{NO}_2^+ [\text{M}+\text{H}]^+$ : 364.2277, found 364.2274.

### Triple allylation of amino acids

(2*S*)- Prop-2-en-1-yl (diprop-2-en-1-ylamino)phenyl ethanoate **4a**

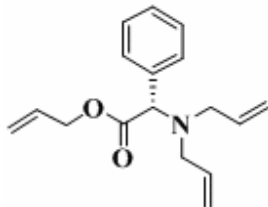

Compound **4a** was obtained after purification through Chromatography (silica gel, petroleum ether/ethyl acetate : 95/5) as a colorless oil, 226.1 mg, yield = 63%,  $[\alpha]_D^{20} +17.6$ , ( $c = 1$ ,  $\text{CH}_2\text{Cl}_2$ ),  $^1\text{H NMR}$  (200 MHz,  $\text{CDCl}_3$ )  $\delta$  7.49 – 7.25 (d,  $J = 7.6$  Hz, 5H), 6.01 – 5.70 (m, 3H), 5.37 – 5.08 (m, 6H), 4.67 (s, 3H), 3.25 (d,  $J = 5.9$  Hz, 4H);  $^{13}\text{C NMR}$  (75 MHz,  $\text{CDCl}_3$ )  $\delta$  171.7, 136.5, 135.5, 131.9, 128.6, 128.3, 127.8, 118.4, 117.5, 67.5, 65.0, 53.1; IR (nujol)  $\text{cm}^{-1}$  : 3081, 2980, 1740, 1642. HRMS calculated for  $\text{C}_{17}\text{H}_{21}\text{NNaO}_2^+$   $[\text{M} + \text{Na}]^+$ : 294.1470, found 294.1471.

(2*S*)-prop-2-en-1-yl 2-(diprop-2-en-1-ylamino)-3-phenylpropanoate **4b**

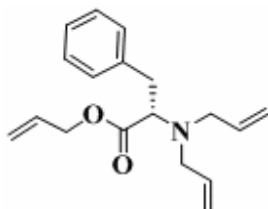

Compound **4b** was obtained after purification through Chromatography (silica gel, petroleum ether/ethyl acetate : 95/5) as a colorless oil, 269.5 mg, yield = 78%,  $[\alpha]_D^{20} -29.8$ , ( $c = 0.92$ ,  $\text{CH}_2\text{Cl}_2$ ),  $^1\text{H NMR}$  (200 MHz,  $\text{CDCl}_3$ )  $\delta$  7.34 – 7.15 (m, 5H), 5.96 – 5.61 (m, 3H), 5.33 – 5.06 (m, 6H), 4.57 (d,  $J = 5.5$  Hz, 2H), 3.76 (t,  $J = 7.6$  Hz, 1H), 3.50 – 3.36 (dd,  $J = 5.1, 14.7$  Hz, 2H), 3.21 – 3.03 (m, 3H), 3.0 – 2.88 (dd,  $J = 6.9, 13.5$  Hz, 1H);  $^{13}\text{C NMR}$  (75 MHz,  $\text{CDCl}_3$ )  $\delta$  171.8, 138.2, 136.1, 131.9, 129.1, 127.9, 126.0, 118.0, 116.9, 64.5, 63.6, 53.3, 35.7; IR (nujol)  $\text{cm}^{-1}$  : 3075, 2958, 1731, 1642. HRMS calculated for  $\text{C}_{18}\text{H}_{24}\text{NO}_2^+$   $[\text{M} + \text{H}]^+$ : 286.1807, found 286.1827.

(2*S*)-prop-2-en-1-yl 2-(diprop-2-en-1-ylamino)-3-methylbutanoate **4c**

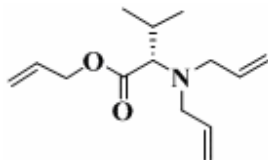

Compound **4c** was obtained after purification through Chromatography (silica gel, petroleum ether/ethyl acetate : 95/5) as a colorless oil, 259.3 mg, yield = 64%,  $[\alpha]_D^{20}$  -88.7, ( $c = 4.0$ ,  $\text{CH}_2\text{Cl}_2$ );  $^1\text{H}$  NMR (200 MHz,  $\text{CDCl}_3$ )  $\delta$  6.04 – 5.65 (m, 3H), 5.41 – 5.05 (m, 6H), 4.61 (d,  $J = 5.8$  Hz, 2H), 3.48 – 3.35 (d,  $J = 14.7$  Hz, 2H), 3.03 – 2.78 (m, 3H), 2.14 – 1.95 (m, 1H), 0.96 (d,  $J = 6.5$  Hz, 3H), 0.86 (d,  $J = 6.5$  Hz, 3H);  $^{13}\text{C}$  NMR (75 MHz,  $\text{CDCl}_3$ )  $\delta$  171.8, 136.4, 132.2, 118.1, 116.6, 68.6, 64.2, 53.1, 27.4, 19.7, 19.3; HRMS calculated for  $\text{C}_{14}\text{H}_{24}\text{NO}_2^+[\text{M}+\text{H}]^+$ : 238.1807, found 238.1807.

(2*S*)-prop-2-en-1-yl 2-(diprop-2-en-1-ylamino)-4-methylpentanoate **4d**

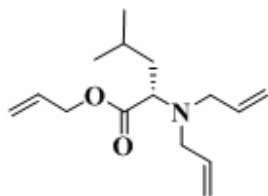

Compound **4d** was obtained after purification through Chromatography (silica gel, petroleum ether/ethyl acetate : 95/5) as a colorless oil, 295.1 mg, yield = 77%,  $[\alpha]_D^{20}$  -57.7, ( $c = 1.2$ ,  $\text{CH}_2\text{Cl}_2$ );  $^1\text{H}$  NMR (200 MHz,  $\text{CDCl}_3$ )  $\delta$  6.03 – 5.67 (m, 3H), 5.39 – 5.04 (m, 6H), 4.59 (d,  $J = 5.5$  Hz, 2H), 3.58 – 3.50 (t,  $J = 7.6$  Hz, 1H), 3.44 – 3.28 (dd,  $J = 4.7, 14.6$  Hz, 2H), 3.04 (dd,  $J = 7.6, 14.6$  Hz, 2H), 1.63 (m, 3H), 0.98 (t,  $J = 6.2$  Hz, 6H);  $^{13}\text{C}$  NMR (75 MHz,  $\text{CDCl}_3$ )  $\delta$  172.9, 136.6, 132.2, 117.9, 116.6, 64.3, 59.6, 53.2, 38.5, 24.4, 22.8, 21.7; IR (nujol)  $\text{cm}^{-1}$  : 3080, 1734, 1641. HRMS calculated for  $\text{C}_{15}\text{H}_{26}\text{NO}_2^+[\text{M}+\text{H}]^+$ : 252.1963, found 252.1963.



(2*S*)-prop-2-en-1-yl 2-(diprop-2-en-1-ylamino)propanoate **4e**

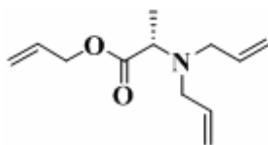

Compound **4e** was obtained after purification through Chromatography (silica gel, petroleum ether/ethyl acetate : 95/5) as a colorless oil, 272.4 mg, yield = 58%,  $[\alpha]_D^{20}$  -59.62, ( $c = 2.7$ ,  $\text{CH}_2\text{Cl}_2$ );  $^1\text{H}$  NMR (200 MHz,  $\text{CDCl}_3$ )  $\delta$  6.06 – 5.72 (ddt,  $J = 6.1, 10.0, 16.8$  Hz, 3H), 5.40 – 5.10 (m, 6H), 4.62 (d,  $J = 5.7$  Hz, 2H), 3.67 – 3.57 (q,  $J = 6.9, 14.2$  Hz, 1H), 3.35 – 3.08 (m, 4H), 1.31 (d,  $J = 7.1$  Hz, 3H);  $^{13}\text{C}$  NMR (75 MHz,  $\text{CDCl}_3$ )  $\delta$  173.0, 136.3, 132.0, 117.7, 116.6, 64.4, 56.9, 53.2, 14.6; IR (nujol)  $\text{cm}^{-1}$  : 3081, 2982, 2839, 1732, 1643. HRMS calculated for  $\text{C}_{12}\text{H}_{20}\text{NO}_2^+ [\text{M}+\text{H}]^+$ : 210.1494, found 210.1497.

(2*R*)-Prop-2-en-1-yl 2-(diprop-2-en-1-ylamino)-3-(1*H*-indol-3-yl)propanoate **4f**

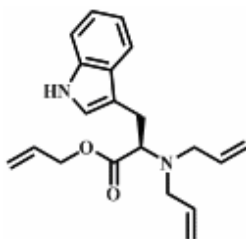

Compound **4f** was obtained after purification through Chromatography (silica gel, petroleum ether/ethyl acetate: 85/15) as a colorless oil, 241.4 mg, yield = 76%,  $[\alpha]_D^{20}$  +0.6, ( $c = 1.5$ ,  $\text{CH}_2\text{Cl}_2$ );  $^1\text{H}$  NMR (200 MHz,  $\text{CDCl}_3$ )  $\delta$  8.16 (bs, 1H), 7.67 (d,  $J = 7.3$  Hz, 1H), 7.37 (d,  $J = 8.4$  Hz, 1H), 7.30 - 7.12 (m, 2H), 7.05 (s, 1H), 5.98 – 5.77 (m, 3H), 5.33 – 5.12 (m, 6H), 4.58 (t,  $J = 5.12$  Hz, 2H), 3.97 (dd,  $J = 5.8, 9.1$  Hz, 1H), 3.55 (dd,  $J = 5.1, 14.6$  Hz, 2H), 3.46 – 3.05 (m, 4H);  $^{13}\text{C}$  NMR (75 MHz,  $\text{CDCl}_3$ )  $\delta$  172.4, 136.3, 136.0, 132.0, 127.4, 122.7, 121.7, 119.1, 118.6, 118.0, 117.1, 112.0, 111.0, 64.6, 62.9, 53.5, 25.5; HRMS calculated for  $\text{C}_{20}\text{H}_{25}\text{N}_2\text{O}_2^+ [\text{M}+\text{H}]^+$ : 325.1916, found 325.1911.

(2*S*)-Prop-2-en-1-yl 2-(diprop-2-en-1-ylamino)-3-[4-(prop-2-en-1-yloxy)phenyl]propanoate **4g**

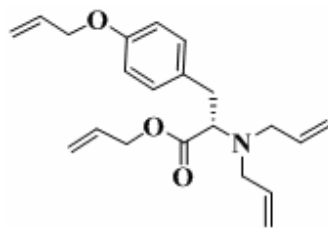

Compound **4g** was obtained after purification through Chromatography (silica gel, petroleum ether/ethyl acetate : 90/10) as a colorless oil, 248.7 mg, yield = 66%,  $[\alpha]_D^{20}$  -14.6, (c 1.1, CH<sub>2</sub>Cl<sub>2</sub>), <sup>1</sup>H NMR (200 MHz, CDCl<sub>3</sub>) δ 7.08 (d, *J*= 8.4 Hz, 2H), 6.82 (d, *J*= 8.4 Hz, 2H), 6.14 – 5.60 (m, 4H), 5.44 – 5.06 (m, 8H), 4.68 – 4.47 (m, 4H), 3.68 (t, *J*= 7.3 Hz, 1H), 3.39 (dd, *J*= 4.75, 14.27 Hz, 2H), 3.17 – 2.75 (m, 4H); <sup>13</sup>C NMR (75 MHz, CDCl<sub>3</sub>) δ 172.1, 157.0, 136.2, 133.3, 132.0, 130.5, 130.1, 118.1, 117.3, 117.0, 114.3, 68.7, 64.6, 63.9, 53.4, 34.9; IR (nujol) cm<sup>-1</sup> : 3079, 1729, 1644, 1611. HRMS calculated for C<sub>21</sub>H<sub>28</sub>NO<sub>3</sub><sup>+</sup>[M+H]<sup>+</sup>: 342.2069, found 342.2066.

(2*S*)-prop-2-en-1-yl 2-(diprop-2-en-1-ylamino)-3-hydroxypropanoate **4h**

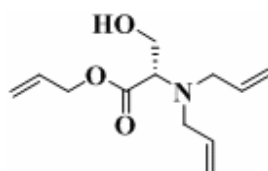

Compound **4h** was obtained as a colorless oil, 300.1 mg, yield = 70%,  $[\alpha]_D^{20}$  -3.29, (c 0.05, CH<sub>2</sub>Cl<sub>2</sub>), <sup>1</sup>H NMR (200 MHz, CDCl<sub>3</sub>) δ 6.01 – 5.64 (m, 3H), 5.36 – 5.07 (m, 6H), 4.59 (d, *J*= 5.4 Hz, 2H), 3.80 – 3.48 (m, 4H), 3.36 (dd, *J*= 4.7, 14.2 Hz, 2H), 3.23 -3.09 (dd, *J*= 8.5, 14.2 Hz, 2H), 2.75 (bs, 1H); <sup>13</sup>C NMR (75 MHz, CDCl<sub>3</sub>) δ 172.8, 135.7, 131.7, 118.5, 117.8, 64.9, 62.4, 58.9, 53.5; HRMS calculated for C<sub>12</sub>H<sub>20</sub>NO<sub>3</sub><sup>+</sup>[M+H]<sup>+</sup>: 226.1443, found 225.1441.

### SAMPLE INFORMATION

|                   |                           |                  |                        |
|-------------------|---------------------------|------------------|------------------------|
| Sample Name:      | RacPGtrialAD0,5mL100H1507 | Acquired By:     | System                 |
| Sample Type:      | Unknown                   | Date Acquired:   | 15/07/09 14:48:22      |
| Vial:             | 999                       | Acq. Method:     | MathieBaskeraminoacids |
| Injection #:      | 1                         | Date Processed:  | 15/07/09 15:20:01      |
| Injection Volume: | 10,00 ul                  | Channel Name:    | 2487Channel 1          |
| Run Time:         | 35,00 Minutes             | Sample Set Name: |                        |

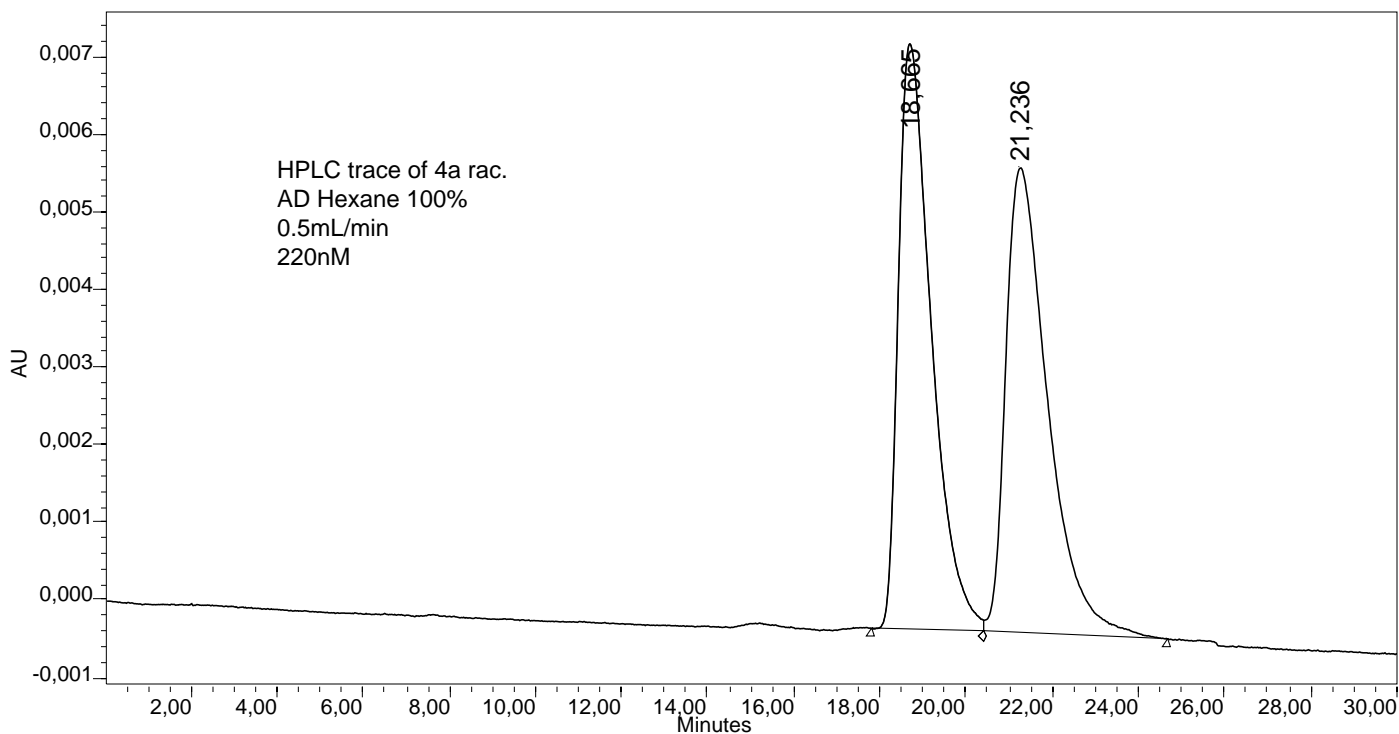

|   | RT (min) | Area (μV*sec) | % Area | Height (μV) | % Height |
|---|----------|---------------|--------|-------------|----------|
| 1 | 18,665   | 404276        | 49,69  | 7553        | 55,70    |
| 2 | 21,236   | 409295        | 50,31  | 6007        | 44,30    |

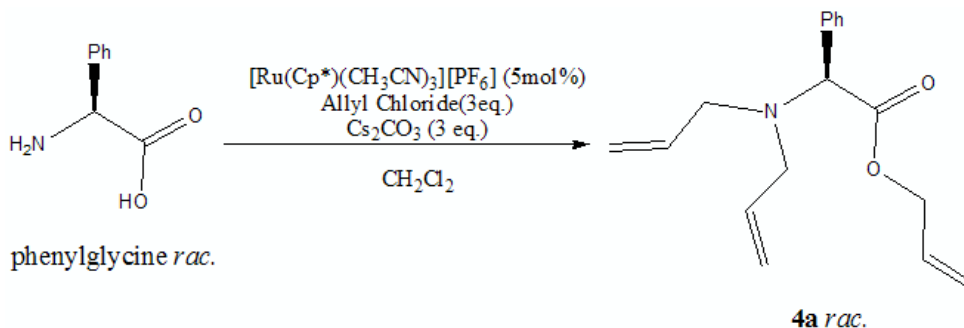

### SAMPLE INFORMATION

|                   |                             |                  |                        |
|-------------------|-----------------------------|------------------|------------------------|
| Sample Name:      | LPGtridirectAD0,5mL100H1507 | Acquired By:     | System                 |
| Sample Type:      | Unknown                     | Date Acquired:   | 15/07/09 17:17:35      |
| Vial:             | 999                         | Acq. Method:     | MathieBaskeraminoacids |
| Injection #:      | 1                           | Date Processed:  | 15/07/09 17:47:56      |
| Injection Volume: | 10,00 ul                    | Channel Name:    | 2487Channel 2          |
| Run Time:         | 30,00 Minutes               | Sample Set Name: |                        |

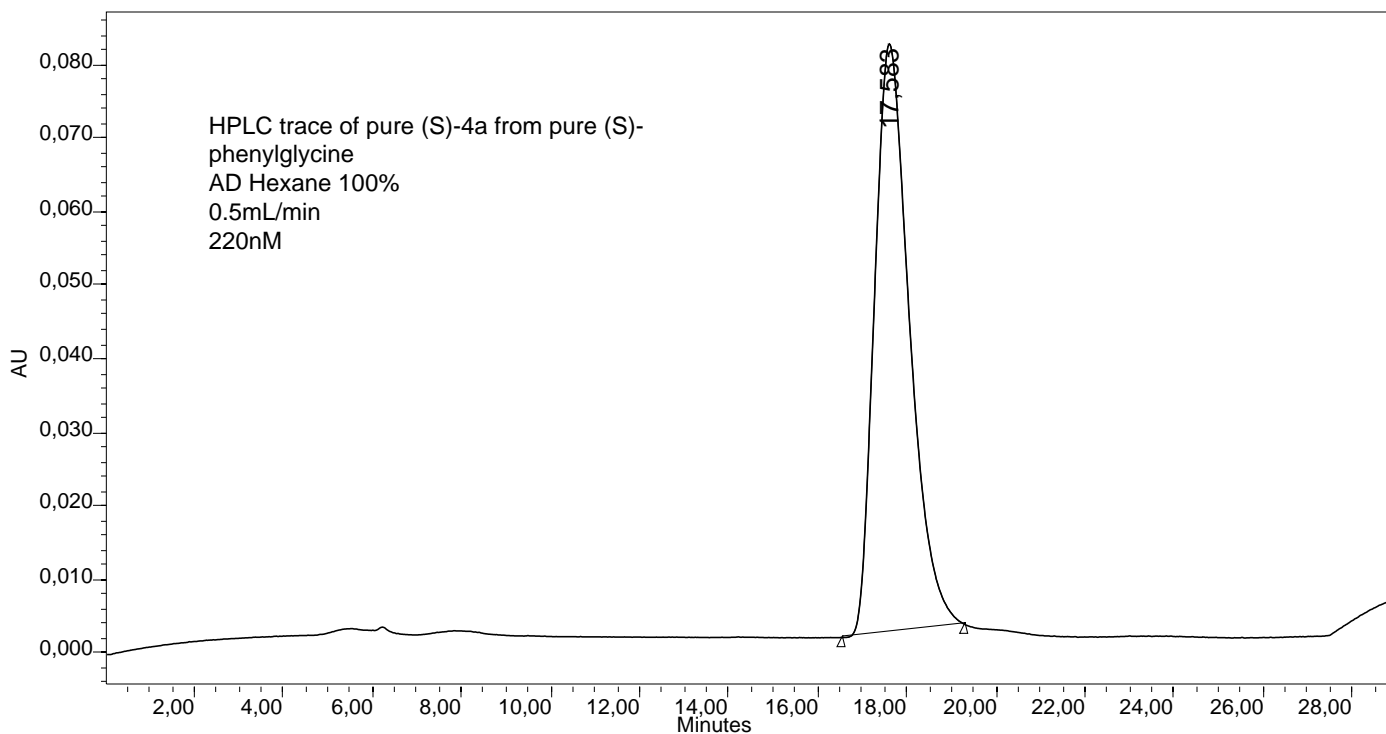

|   | RT (min) | Area (μV*sec) | % Area | Height (μV) | % Height |
|---|----------|---------------|--------|-------------|----------|
| 1 | 17,583   | 4373832       | 100,00 | 79974       | 100,00   |

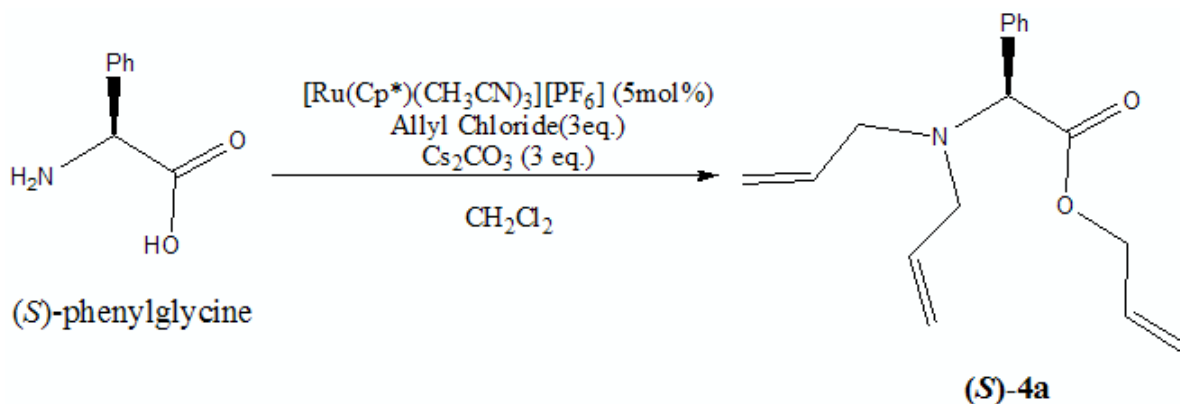

### SAMPLE INFORMATION

|                   |                              |                  |                        |
|-------------------|------------------------------|------------------|------------------------|
| Sample Name:      | LPGDitoTriAD0,5mL100Hdilue16 | Acquired By:     | System                 |
| Sample Type:      | Unknown                      | Date Acquired:   | 16/07/09 10:51:52      |
| Vial:             | 999                          | Acq. Method:     | MathieBaskeraminoacids |
| Injection #:      | 3                            | Date Processed:  | 16/07/09 16:39:01      |
| Injection Volume: | 10,00 ul                     | Channel Name:    | 2487Channel 1          |
| Run Time:         | 26,00 Minutes                | Sample Set Name: |                        |

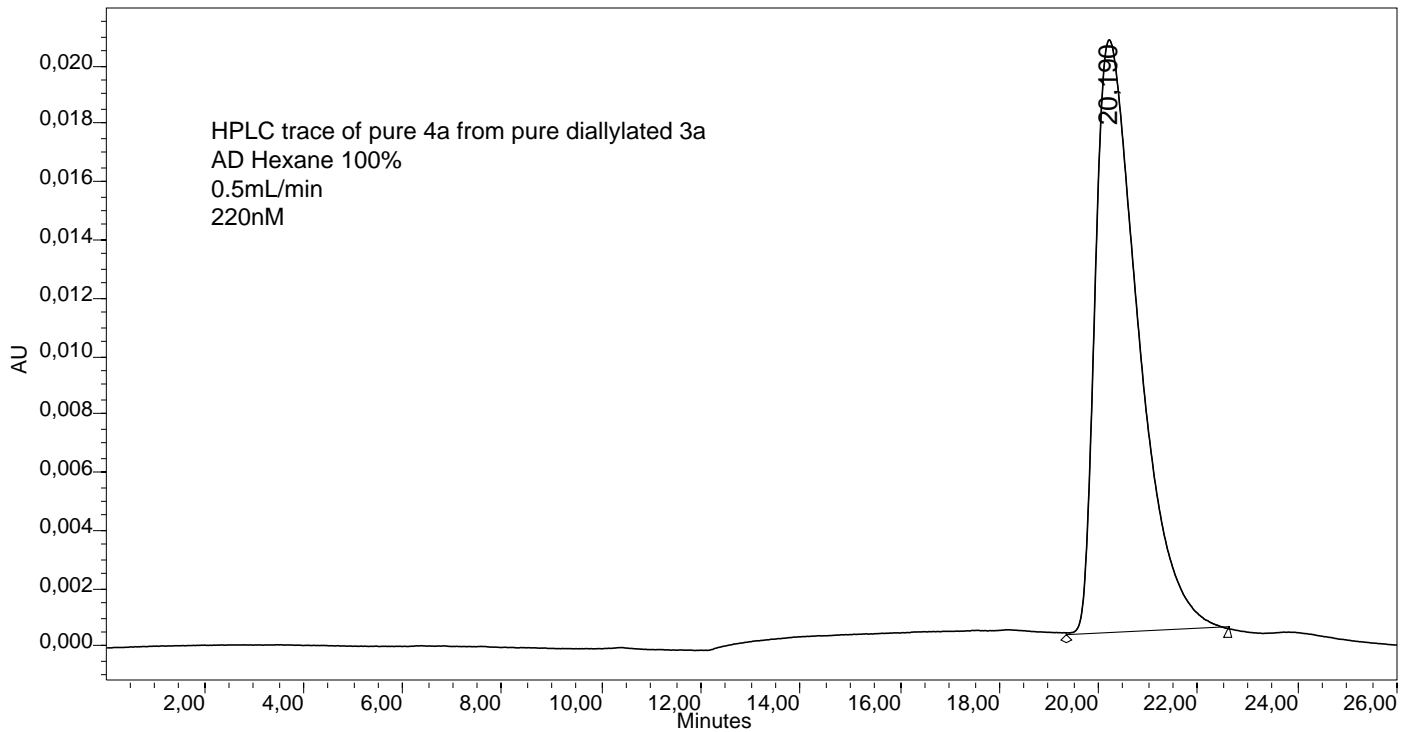

|   | RT<br>(min) | Area<br>( $\mu\text{V}\cdot\text{sec}$ ) | % Area | Height<br>( $\mu\text{V}$ ) | % Height |
|---|-------------|------------------------------------------|--------|-----------------------------|----------|
| 1 | 20,190      | 1233241                                  | 100,00 | 20444                       | 100,00   |

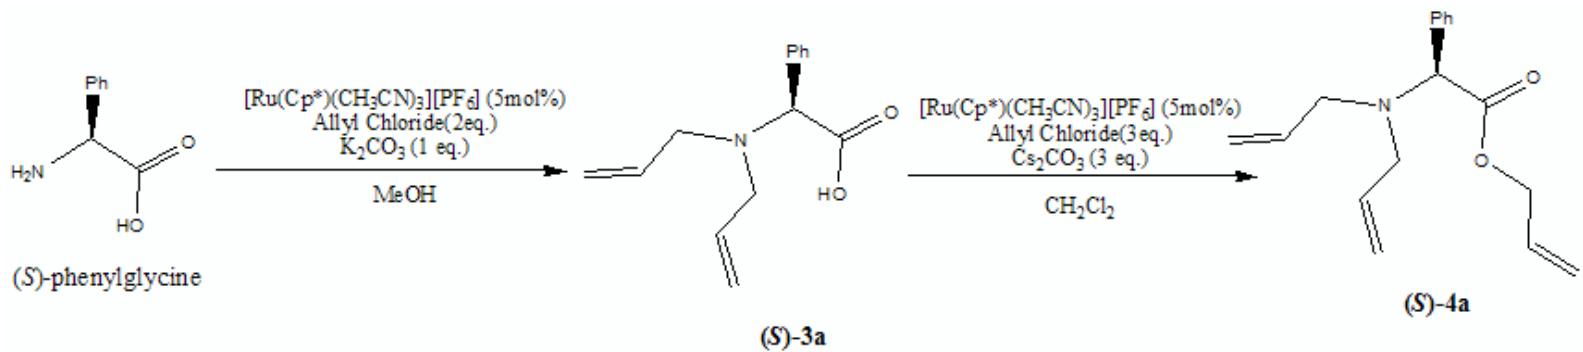

### SAMPLE INFORMATION

|                   |                             |                  |                        |
|-------------------|-----------------------------|------------------|------------------------|
| Sample Name:      | RacPatrialIAD0,5mL100Hdilue | Acquired By:     | System                 |
| Sample Type:      | Unknown                     | Date Acquired:   | 16/07/09 14:40:20      |
| Vial:             | 999                         | Acq. Method:     | MathieBaskeraminoacids |
| Injection #:      | 5                           | Date Processed:  | 16/07/09 16:40:35      |
| Injection Volume: | 10,00 ul                    | Channel Name:    | 2487Channel 1          |
| Run Time:         | 30,00 Minutes               | Sample Set Name: |                        |

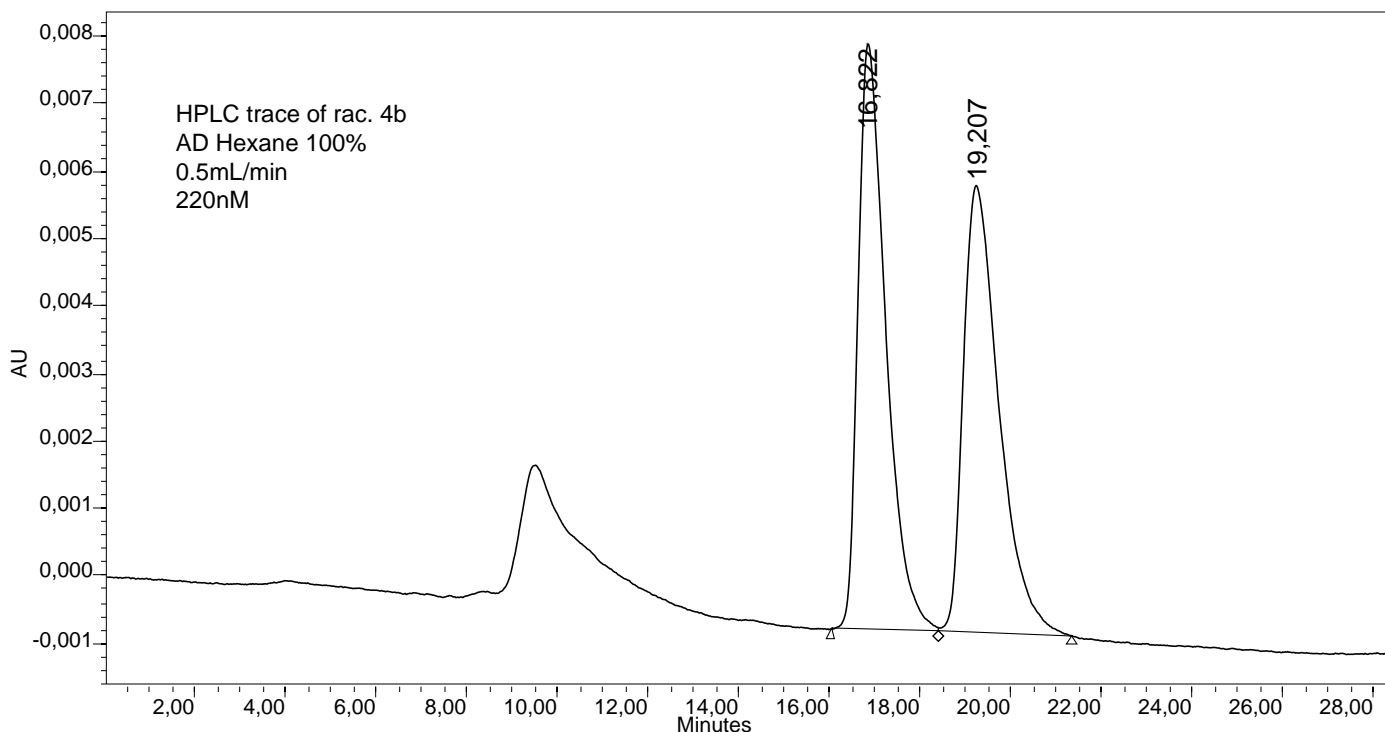

|   | RT<br>(min) | Area<br>( $\mu\text{V}\cdot\text{sec}$ ) | % Area | Height<br>( $\mu\text{V}$ ) | % Height |
|---|-------------|------------------------------------------|--------|-----------------------------|----------|
| 1 | 16,822      | 372421                                   | 50,59  | 8698                        | 56,71    |
| 2 | 19,207      | 363737                                   | 49,41  | 6640                        | 43,29    |

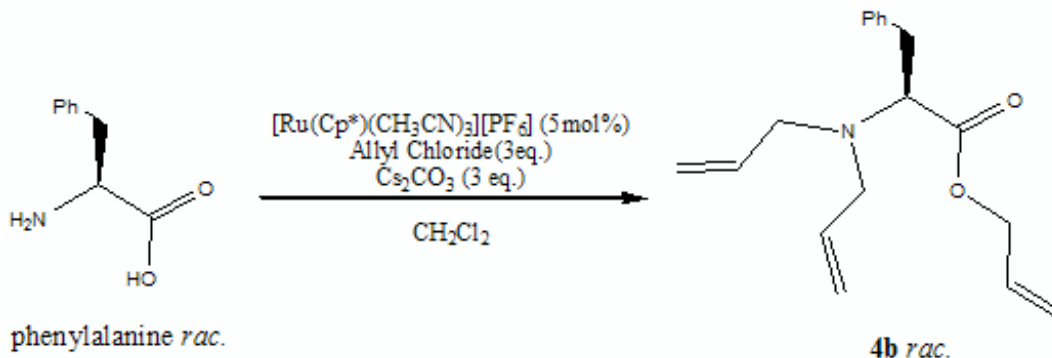

## SAMPLE INFORMATION

|                   |                      |                  |                        |
|-------------------|----------------------|------------------|------------------------|
| Sample Name:      | LPAtridayAD0,5mL100H | Acquired By:     | System                 |
| Sample Type:      | Unknown              | Date Acquired:   | 16/07/09 15:50:42      |
| Vial:             | 999                  | Acq. Method:     | MathieBaskeraminoacids |
| Injection #:      | 7                    | Date Processed:  | 16/07/09 16:42:12      |
| Injection Volume: | 10,00 ul             | Channel Name:    | 2487Channel 1          |
| Run Time:         | 30,00 Minutes        | Sample Set Name: |                        |

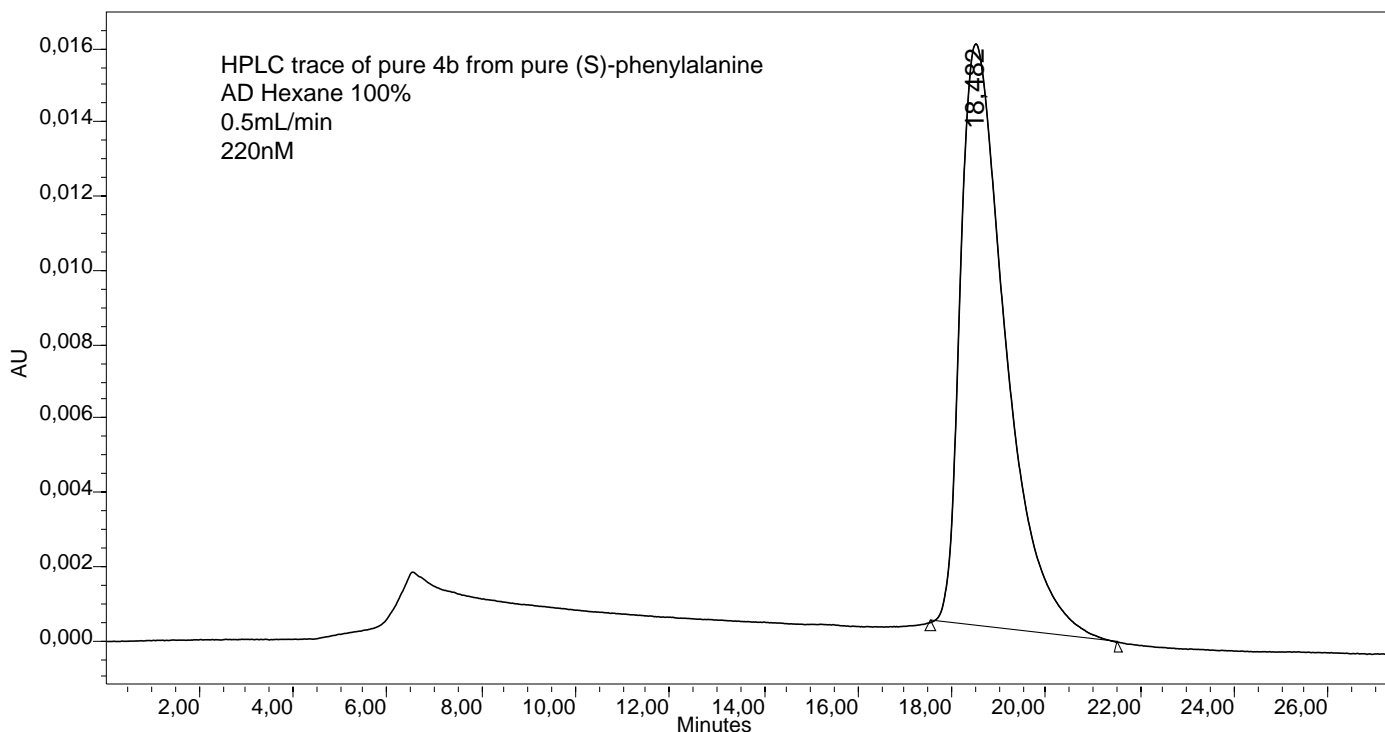

|   | RT<br>(min) | Area<br>( $\mu V \cdot sec$ ) | % Area | Height<br>( $\mu V$ ) | % Height |
|---|-------------|-------------------------------|--------|-----------------------|----------|
| 1 | 18,482      | 1054440                       | 100,00 | 15750                 | 100,00   |

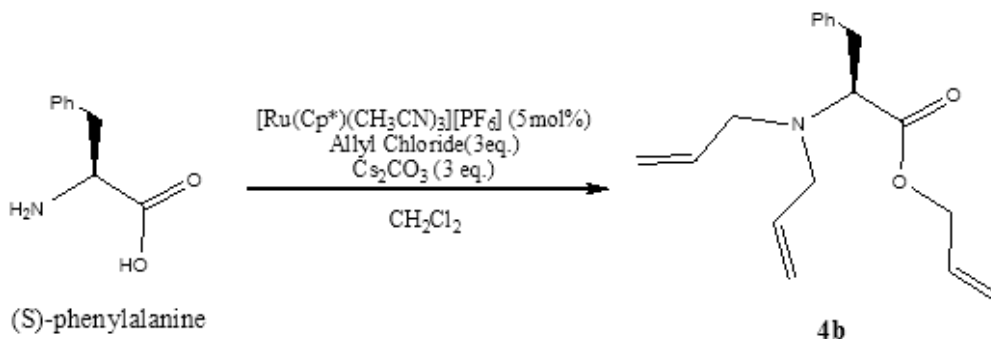

### SAMPLE INFORMATION

|                   |                            |                  |                        |
|-------------------|----------------------------|------------------|------------------------|
| Sample Name:      | LPAditotriAD0,5mL100Hdilue | Acquired By:     | System                 |
| Sample Type:      | Unknown                    | Date Acquired:   | 16/07/09 17:16:29      |
| Vial:             | 999                        | Acq. Method:     | MathieBaskeraminoacids |
| Injection #:      | 10                         | Date Processed:  | 16/07/09 17:45:50      |
| Injection Volume: | 10,00 ul                   | Channel Name:    | 2487Channel 1          |
| Run Time:         | 30,00 Minutes              | Sample Set Name: |                        |

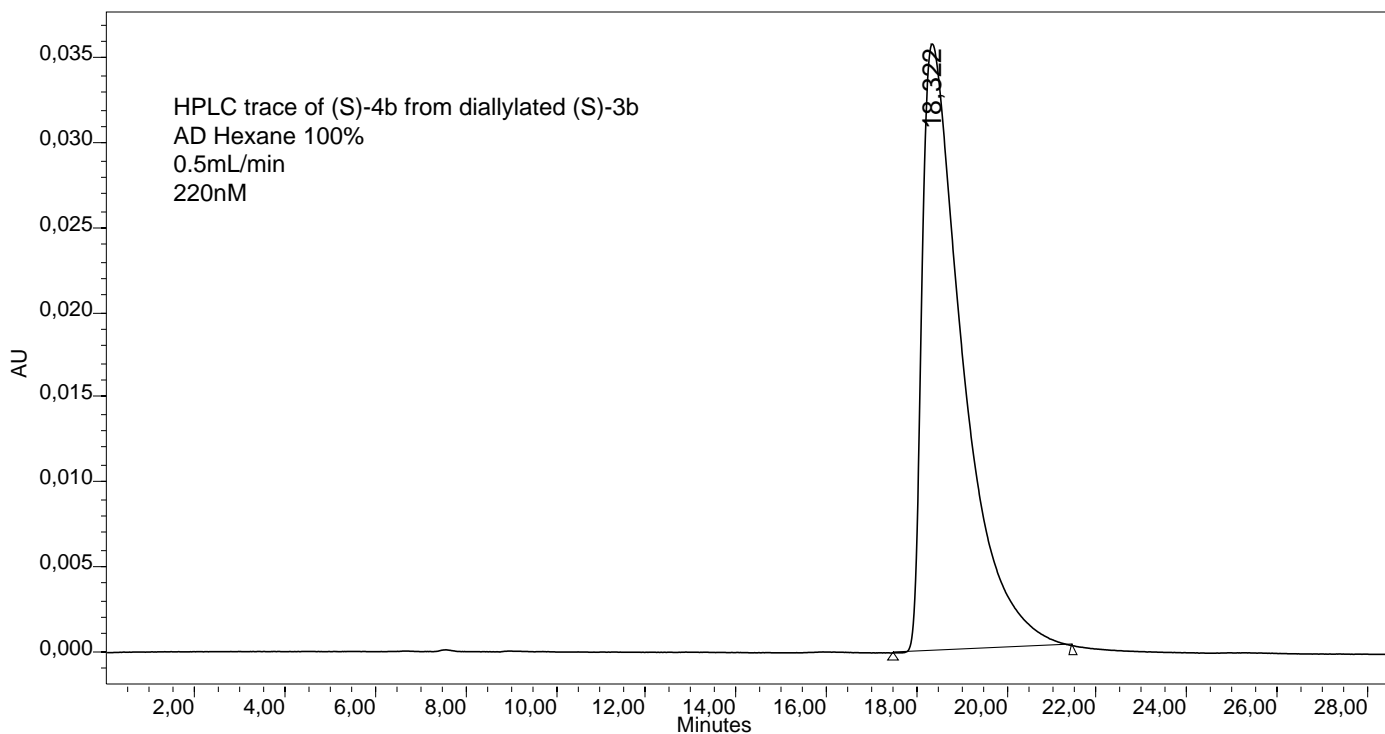

|   | RT<br>(min) | Area<br>( $\mu V \cdot sec$ ) | % Area | Height<br>( $\mu V$ ) | % Height |
|---|-------------|-------------------------------|--------|-----------------------|----------|
| 1 | 18,322      | 2252298                       | 100,00 | 35880                 | 100,00   |

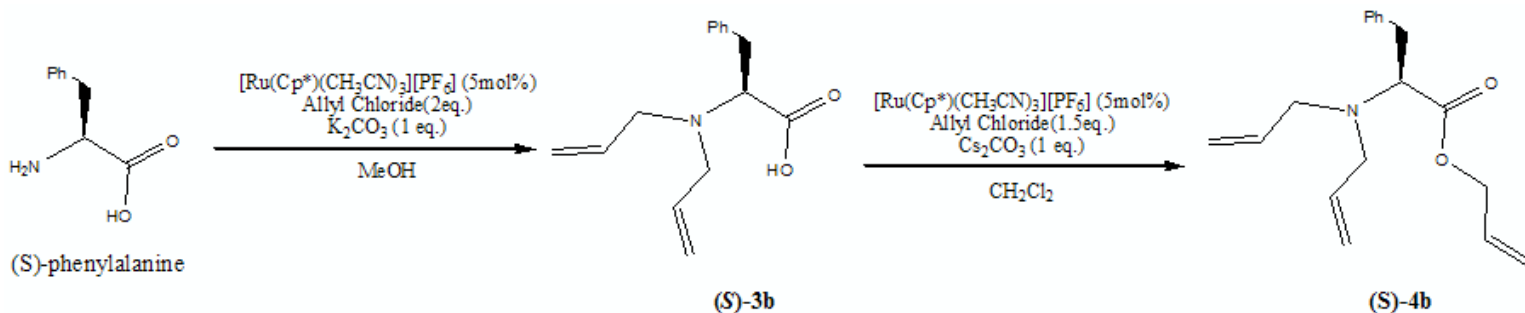



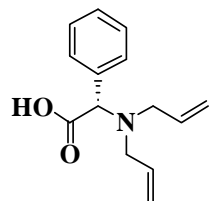

3a

7.346  
7.304

5.887  
5.856  
5.772  
5.721  
5.690  
5.185  
5.138  
5.092

4.409

3.177  
3.145  
3.117

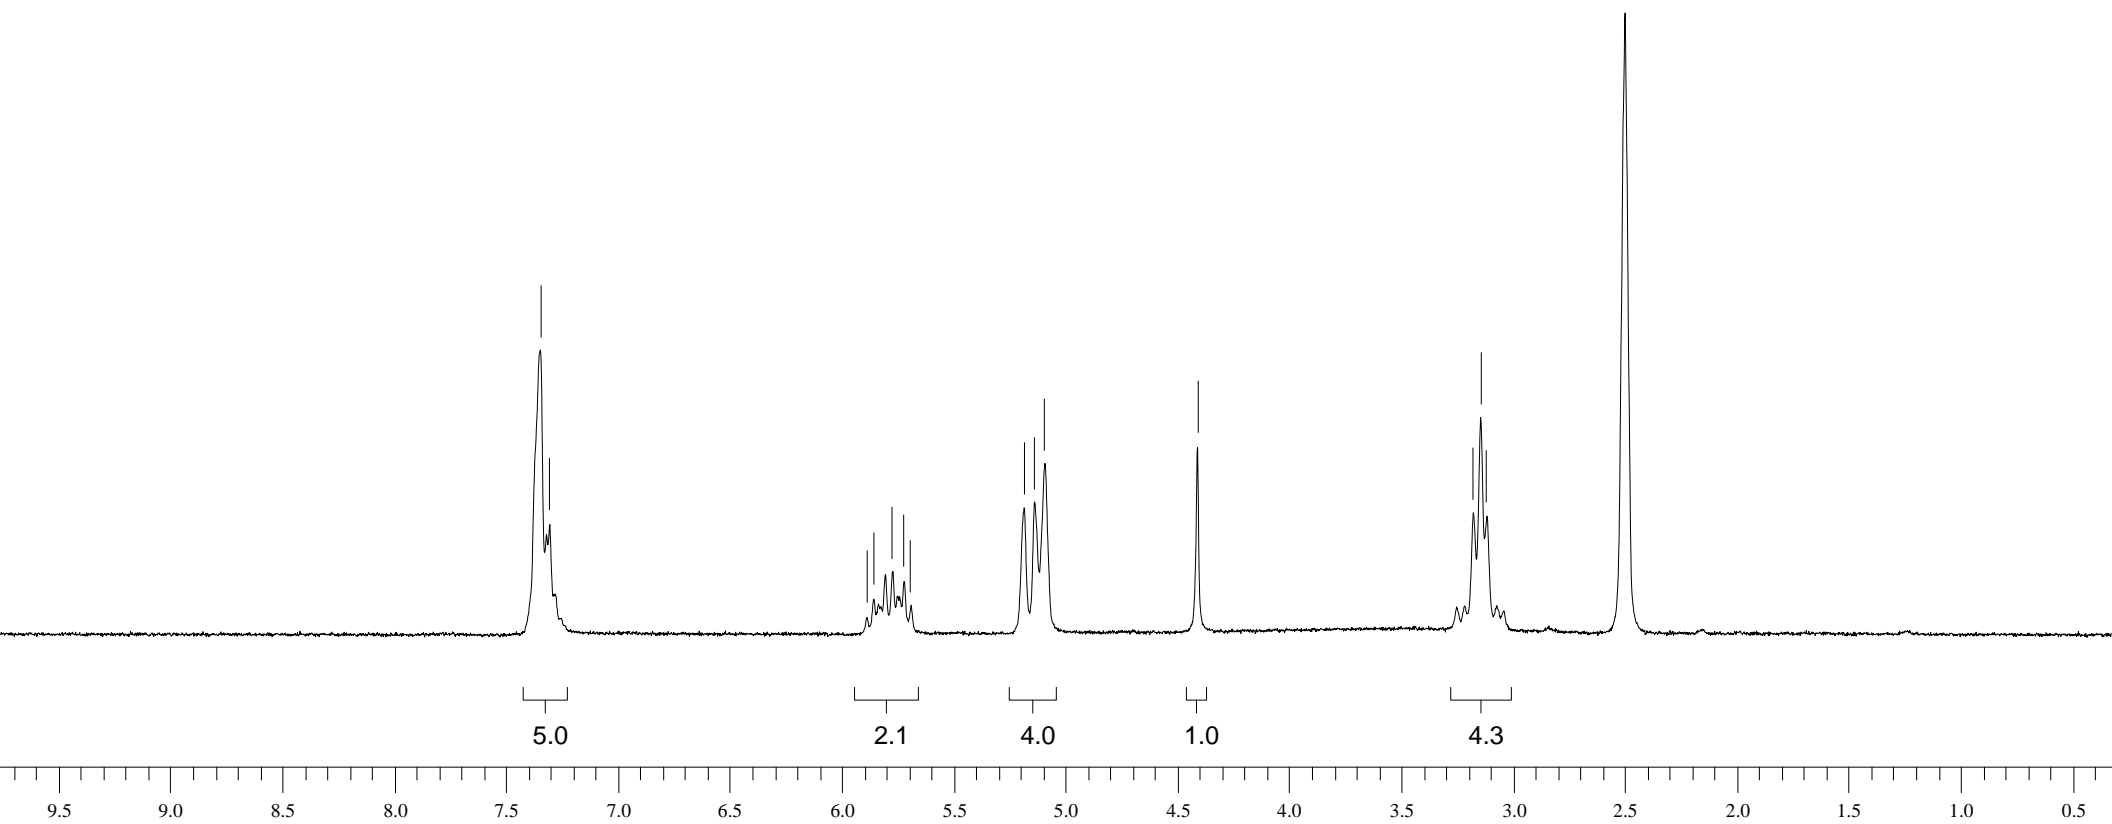

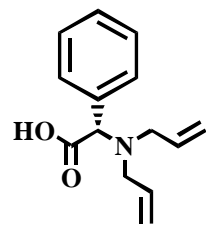

172.723

137.283

135.210

128.577

128.202

127.629

117.735

67.882

52.544

3a

225

200

175

150

125

100

75

50

25

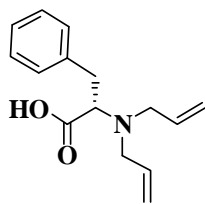

**3b**

7.251  
7.224  
7.191  
7.161

5.719  
5.633  
5.607  
5.549  
5.523  
5.136  
5.055  
5.009

3.556  
3.519  
3.481  
3.353  
3.327  
3.279  
3.256  
3.124  
3.013  
2.907  
2.813  
2.744

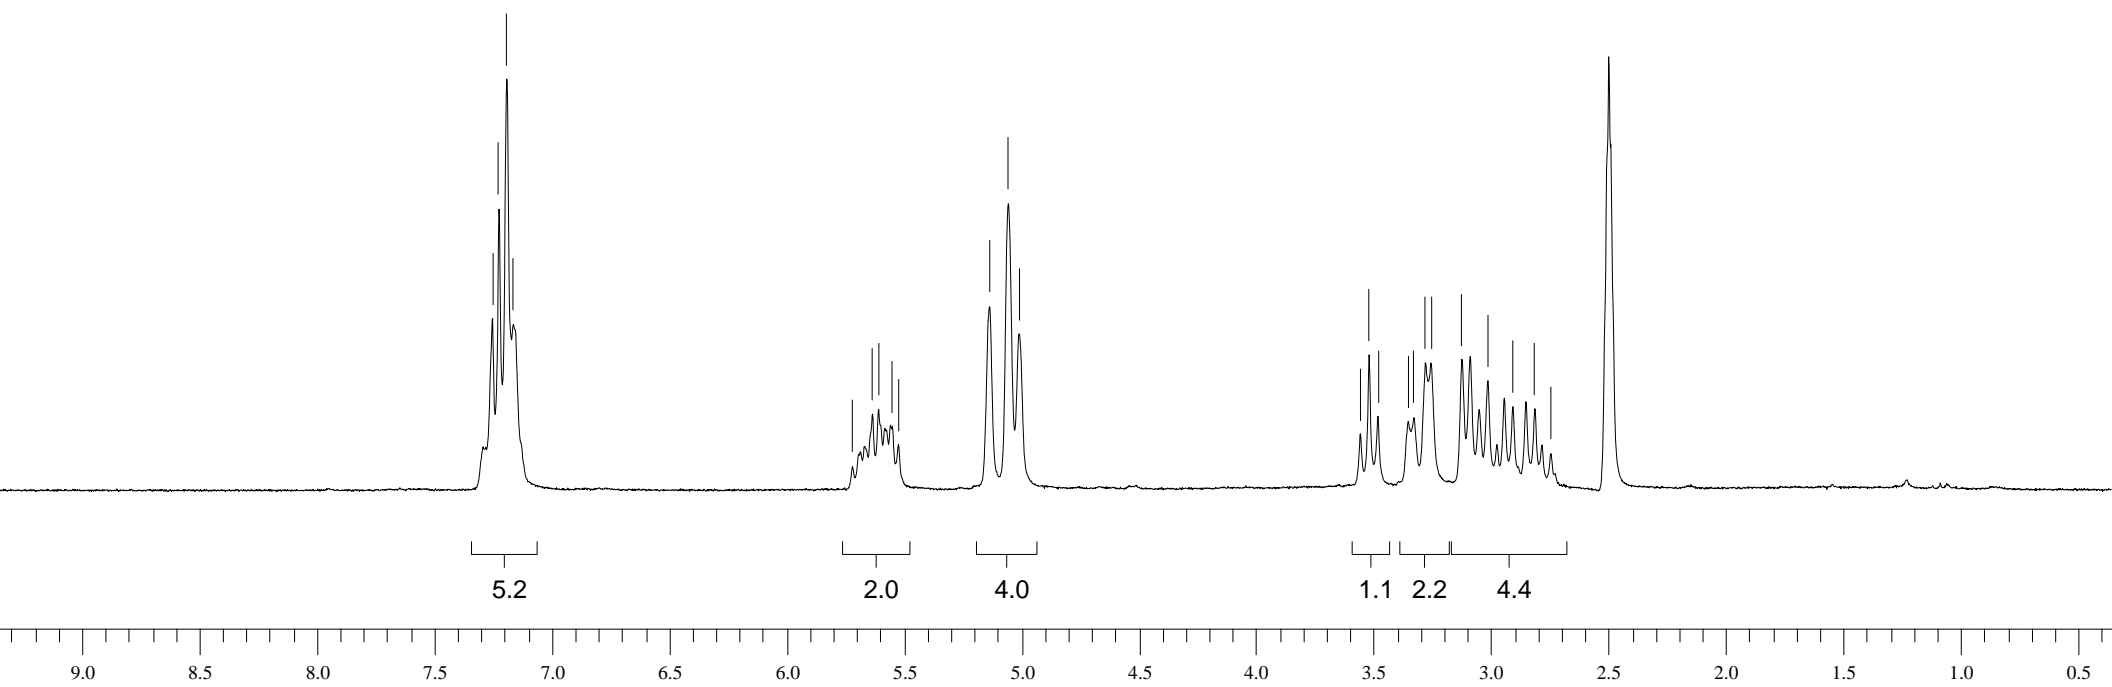

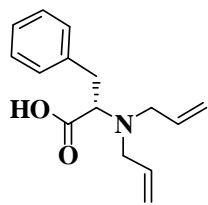

3b

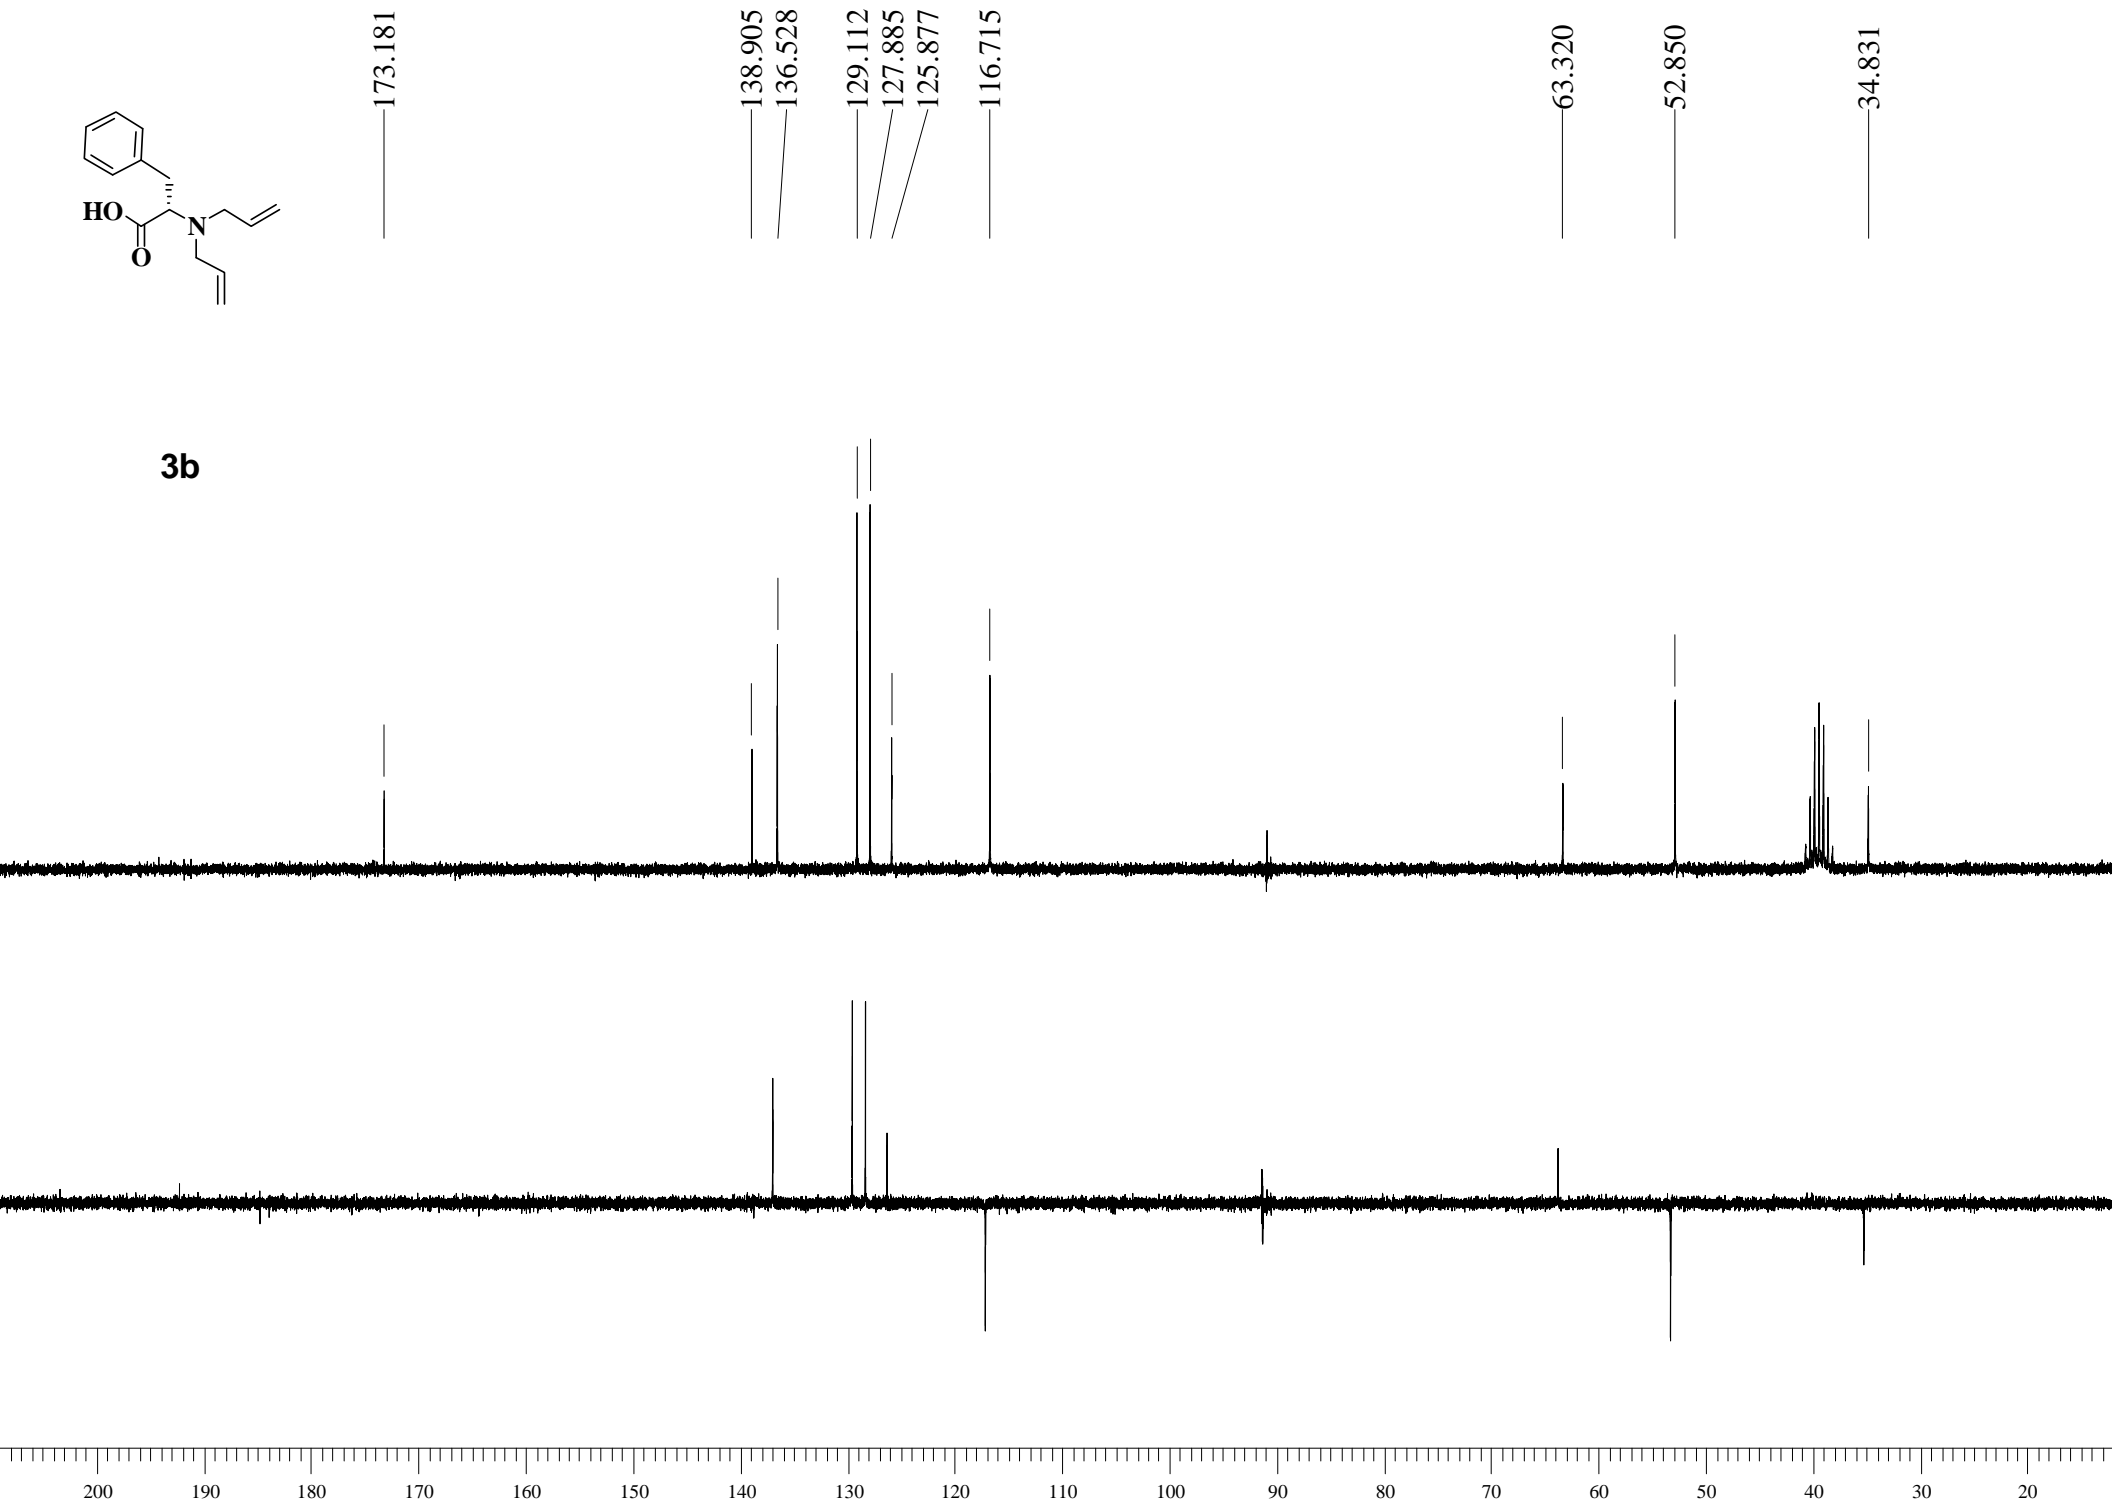

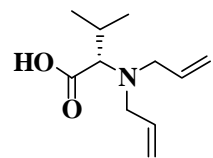

**3c**

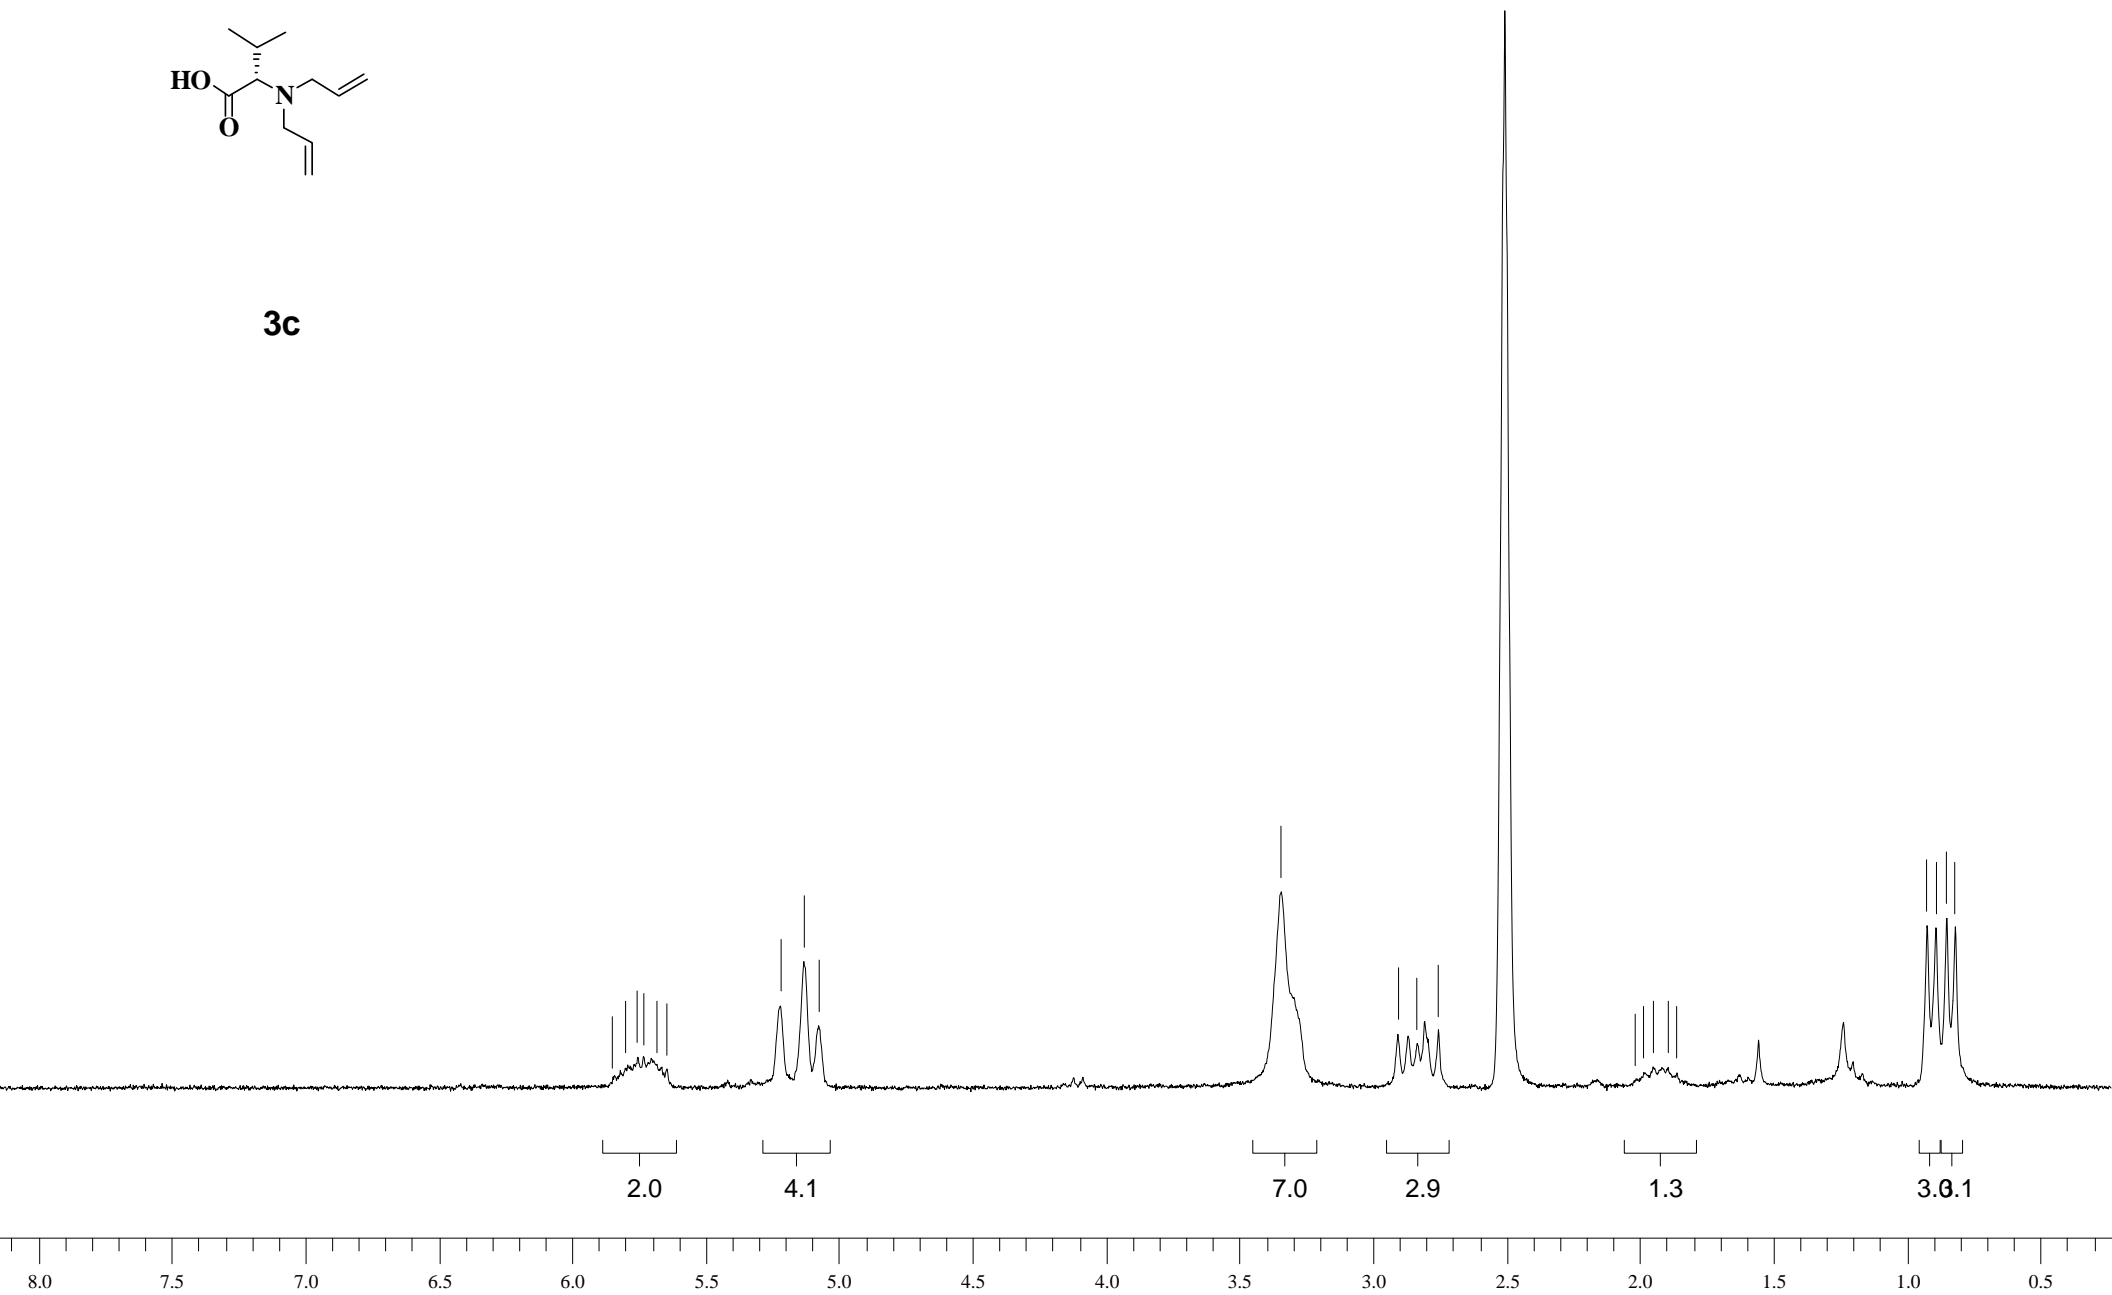

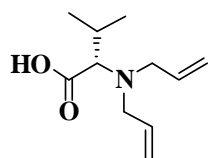

3c

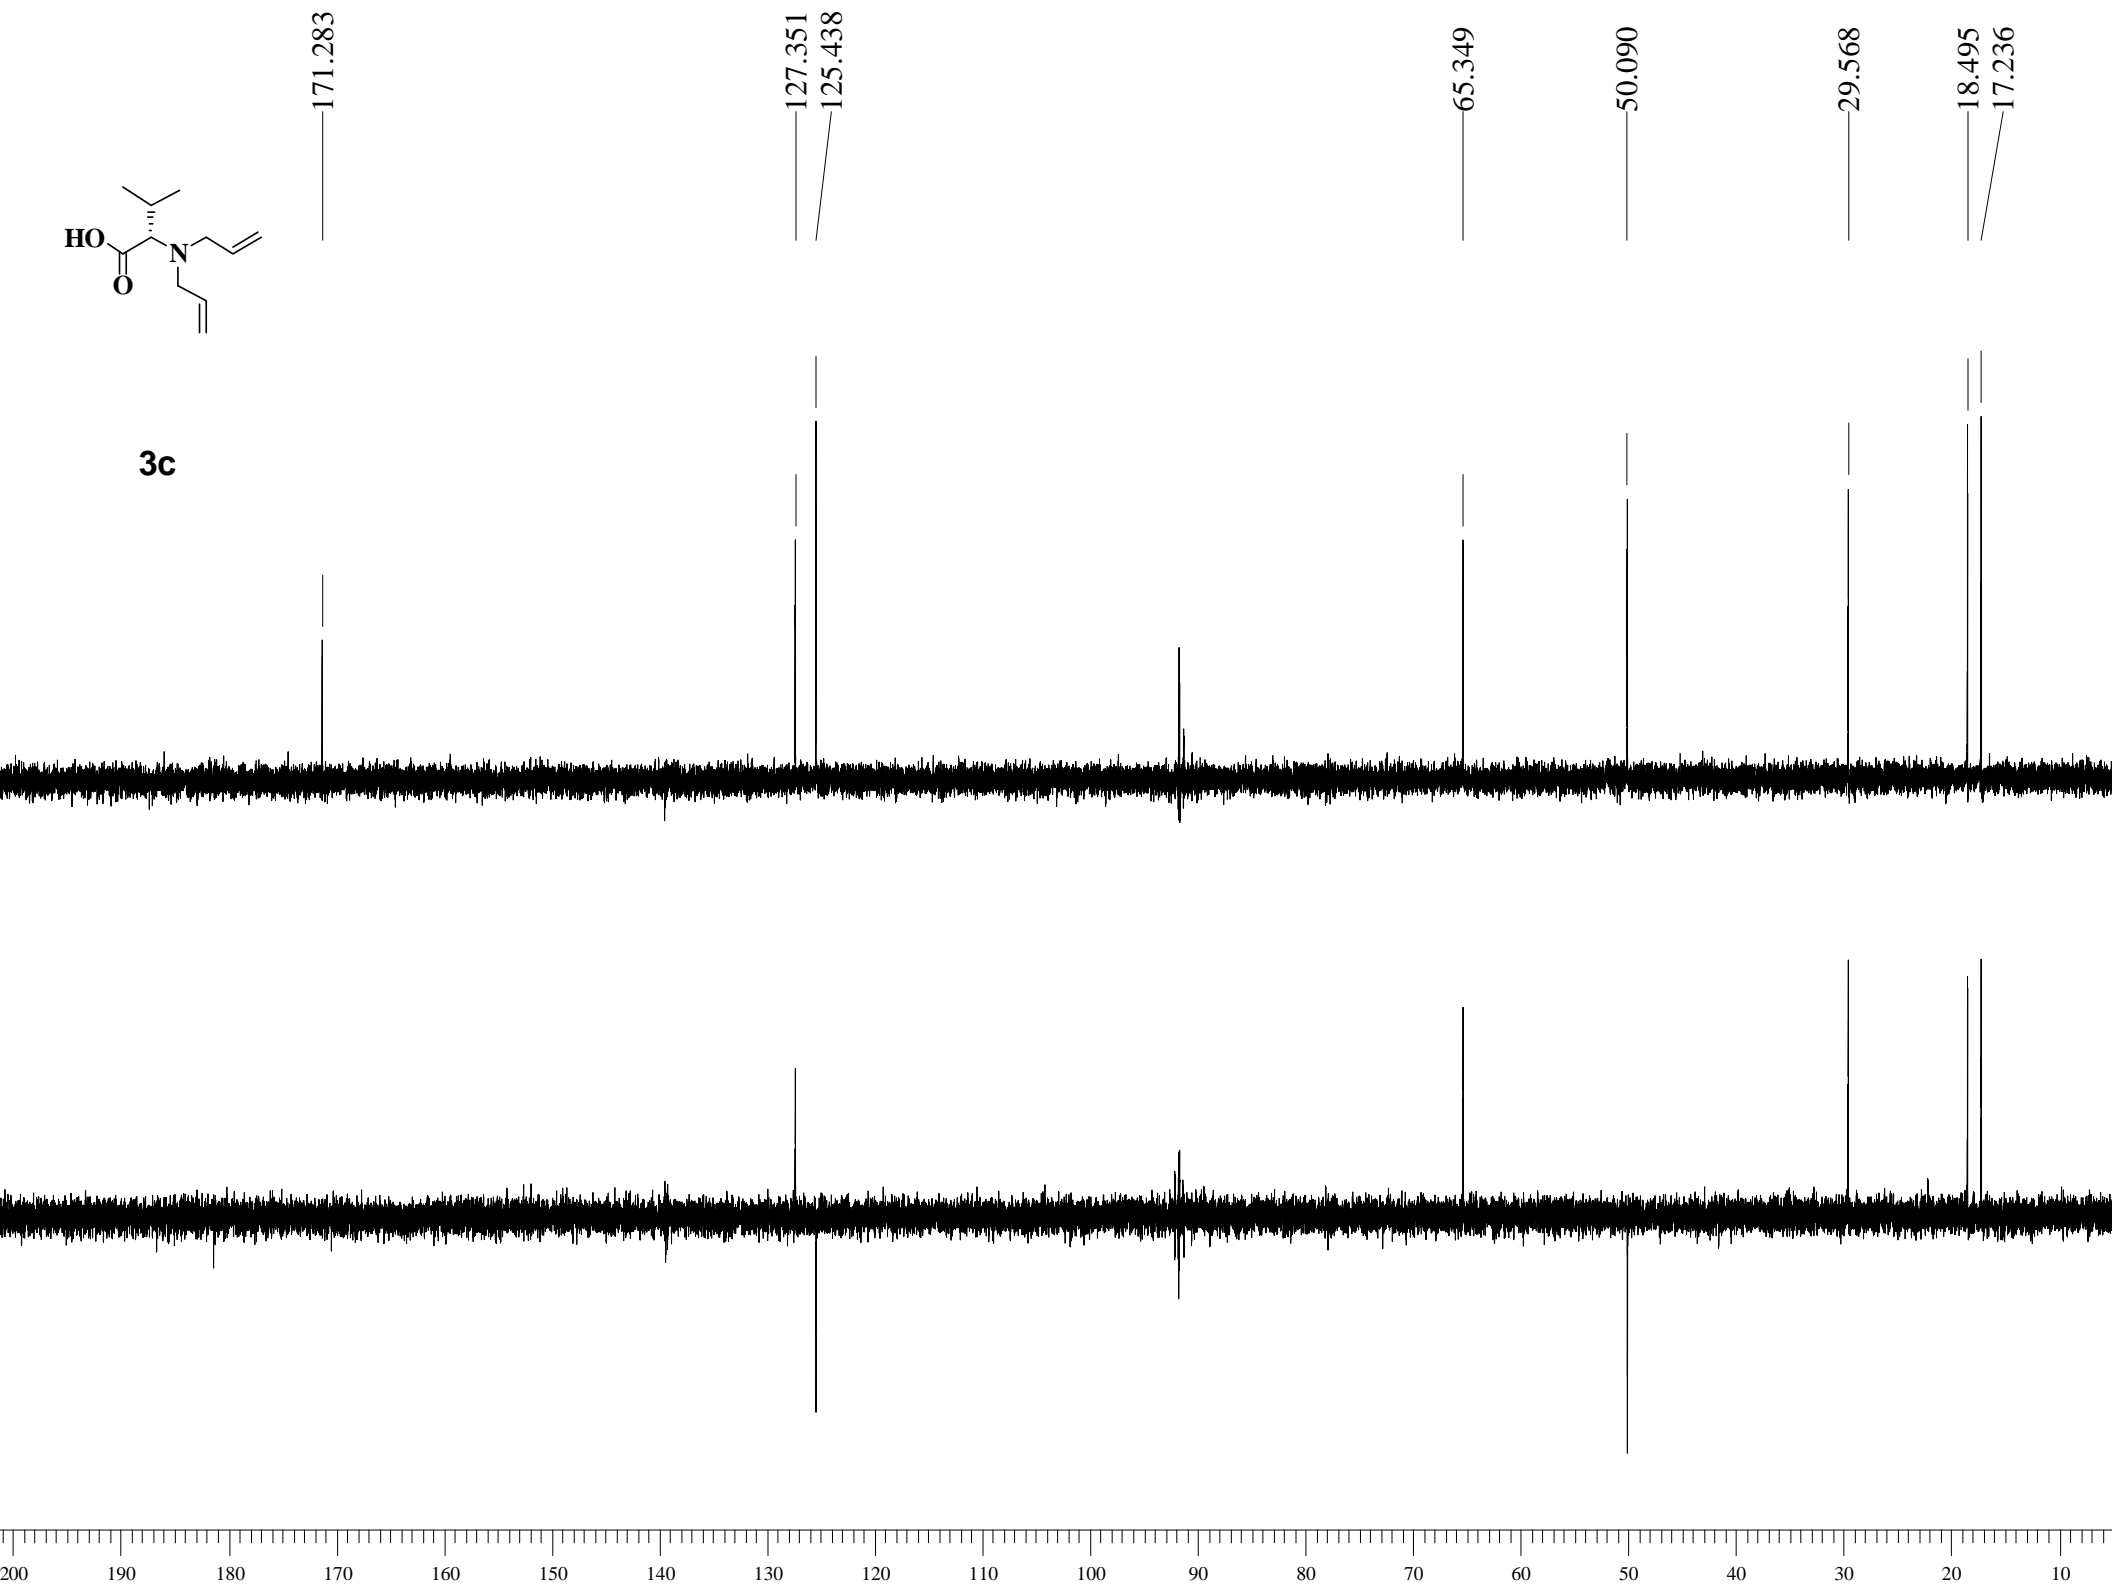

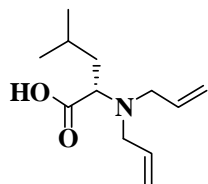

3d

5.838  
5.788  
5.752  
5.728  
5.717  
5.642  
5.205  
5.112  
5.057

3.362  
3.327  
3.289  
3.251  
3.226  
3.091  
3.053  
2.981

1.705  
1.638  
1.574  
1.504  
1.461  
1.316  
0.871  
0.843  
0.813

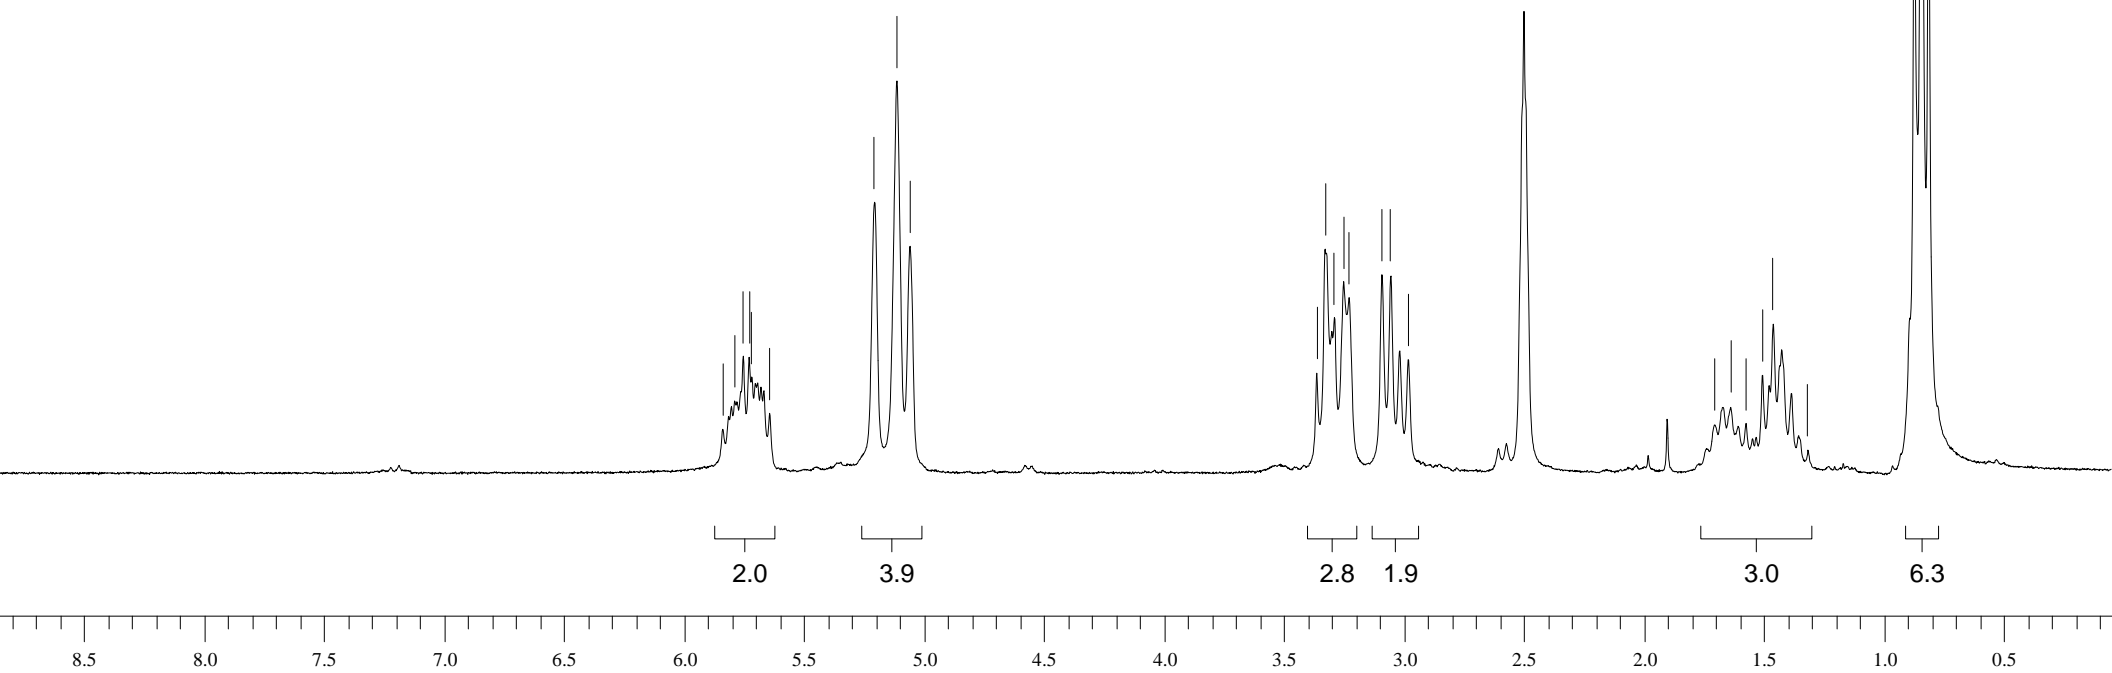

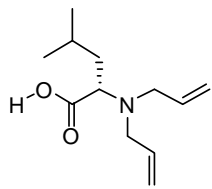

3d

174.242

136.733

116.680

59.202

52.891

37.979

24.054

22.787

21.632

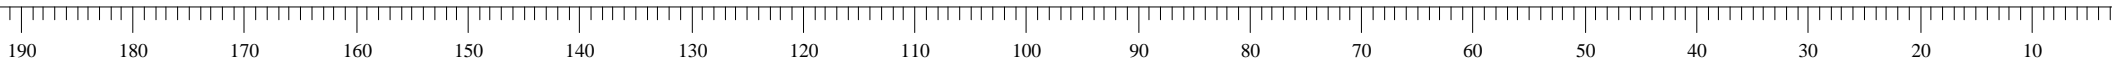



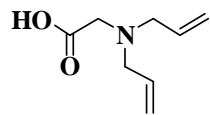

**3e**

6.123  
6.028  
5.943  
5.907  
5.653  
5.627  
5.572

3.863  
3.828  
3.650

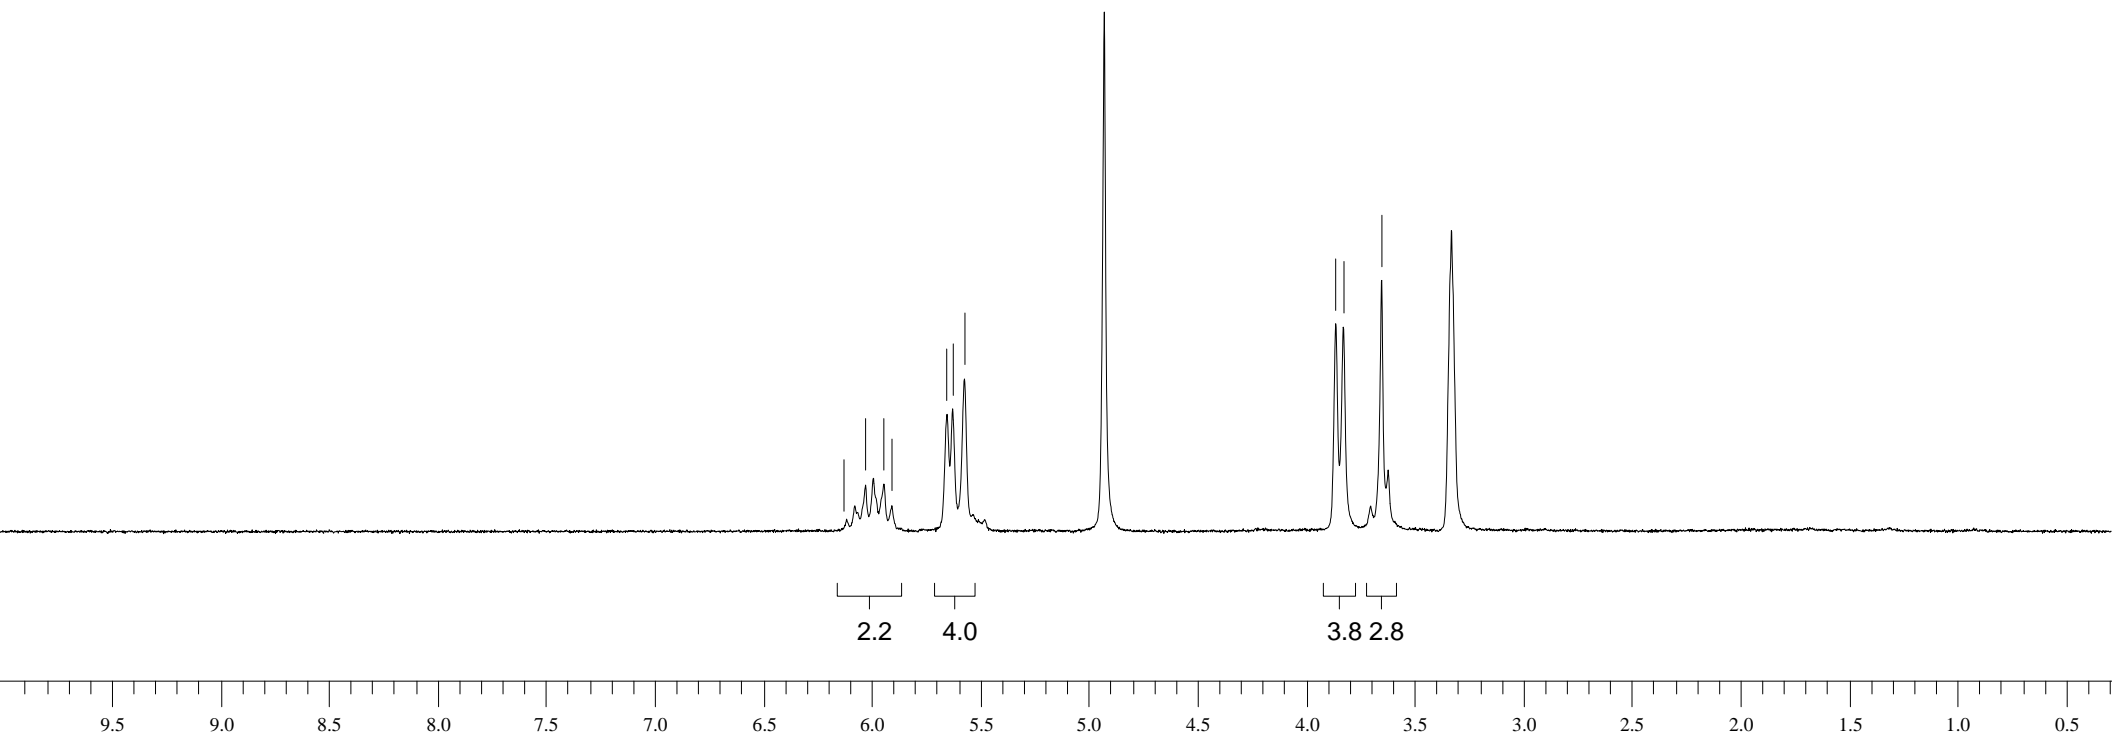

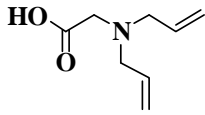

3e

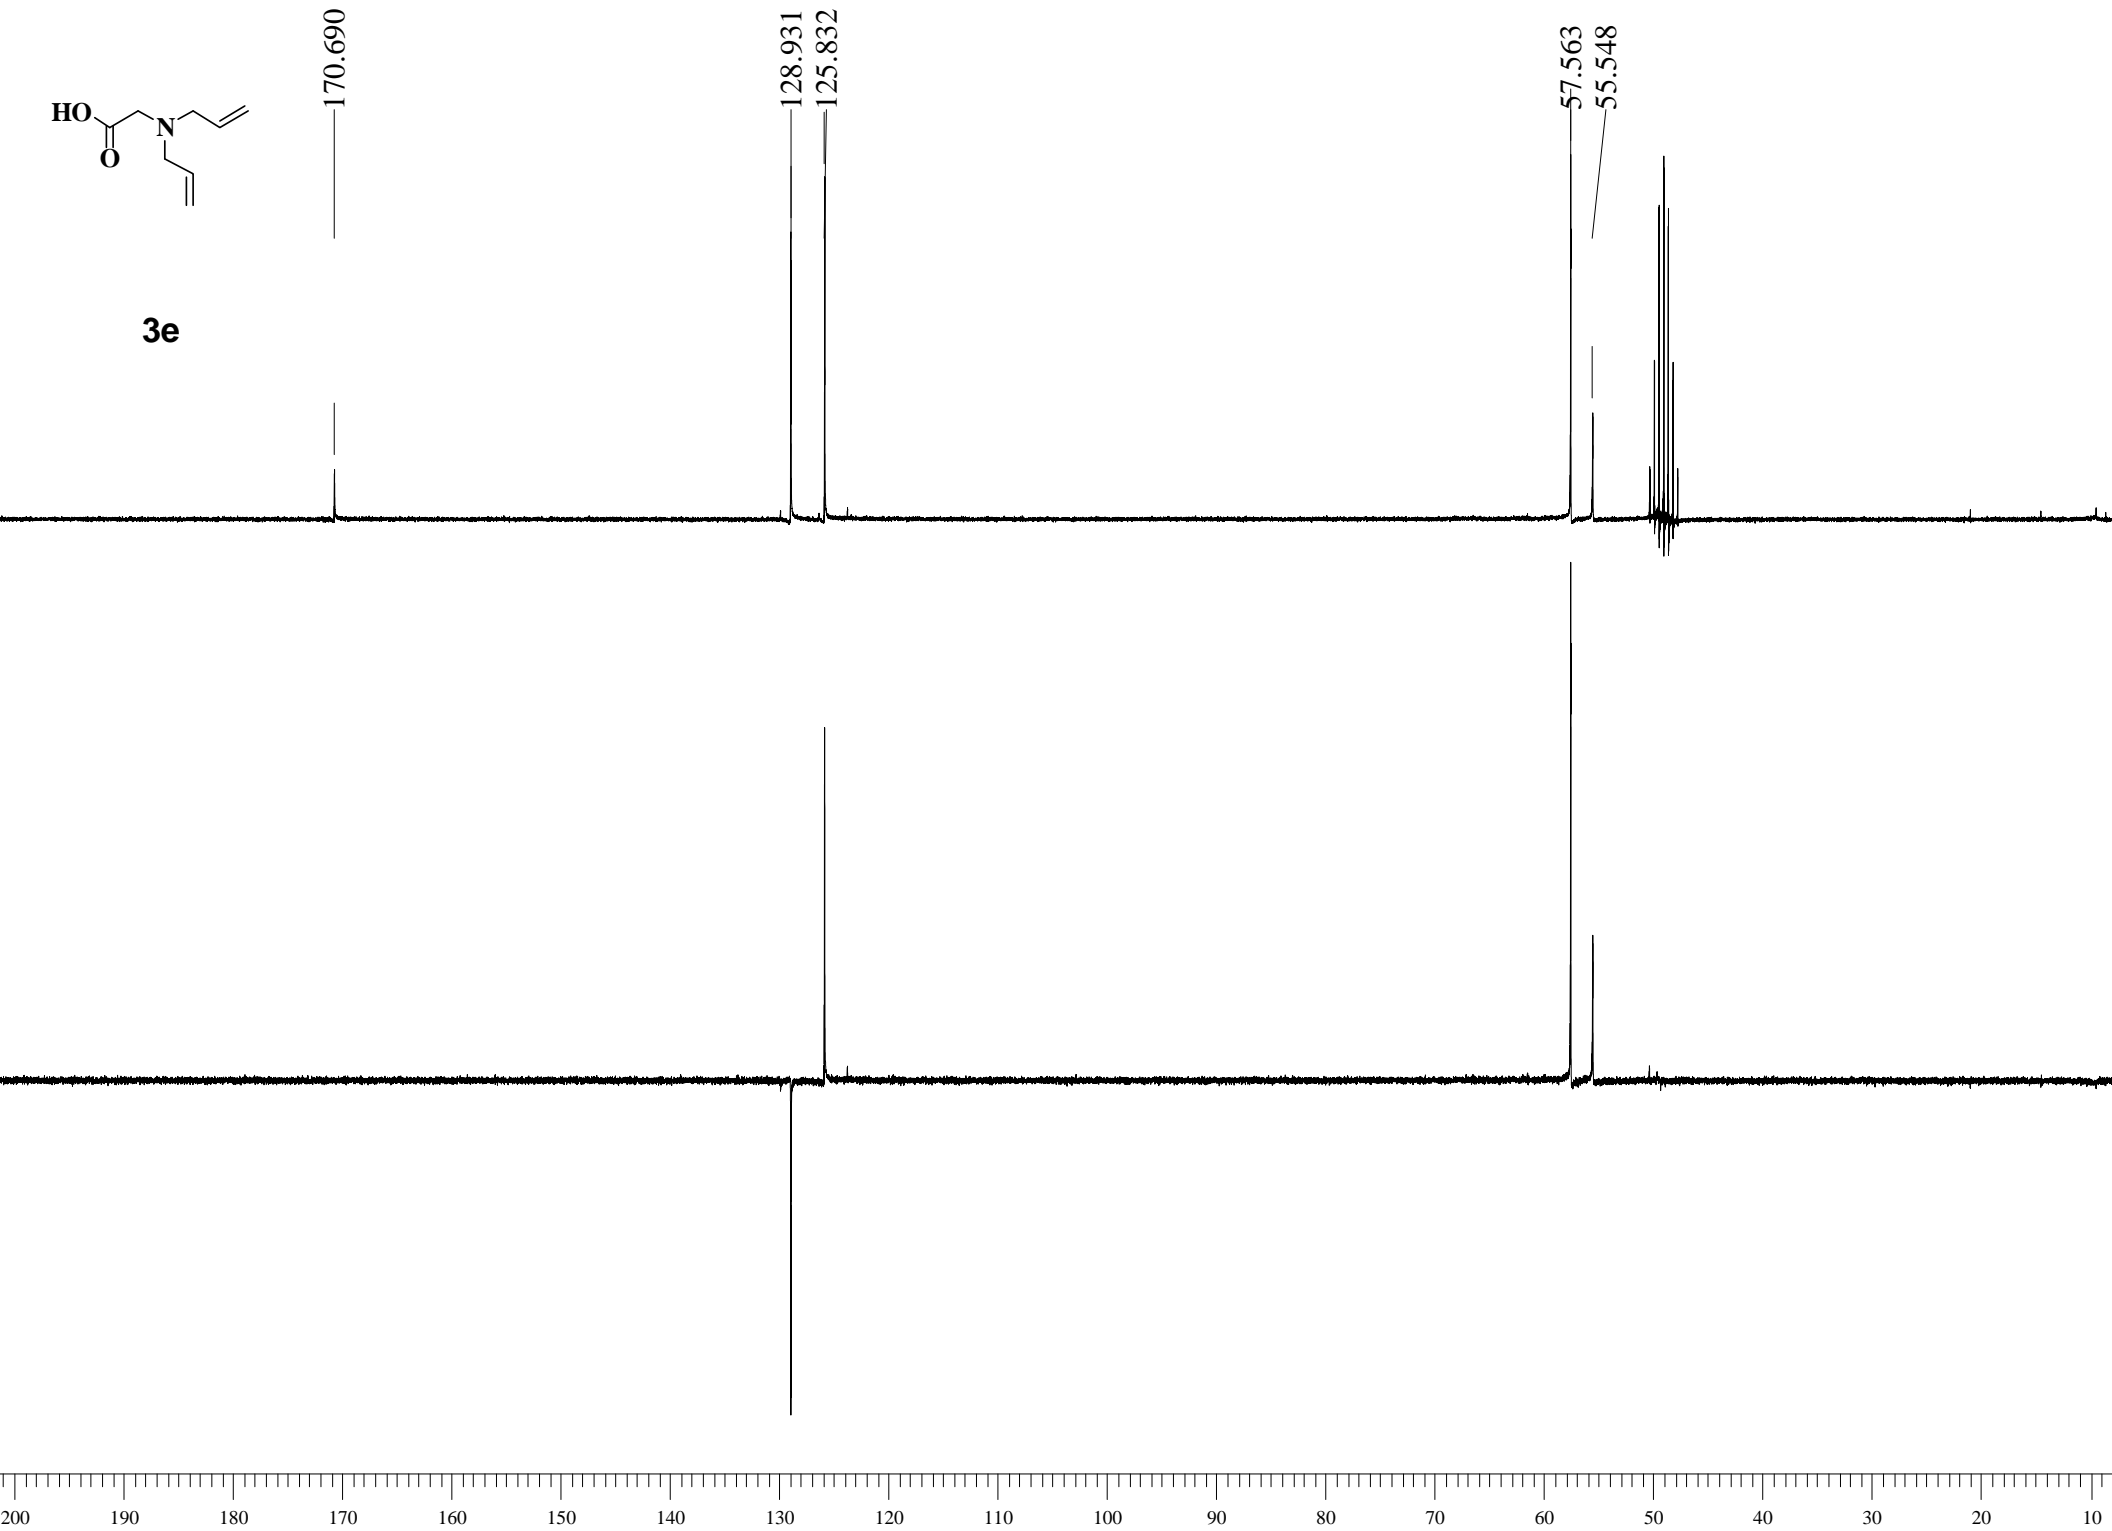

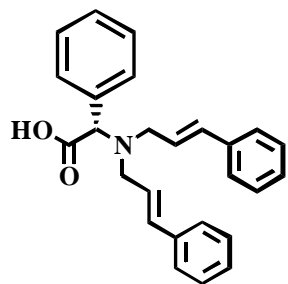

3f

7.682  
7.554  
7.483  
7.382  
7.353  
6.836  
6.757  
6.406  
6.366  
6.328  
6.249  
5.206  
4.099  
4.045  
3.991  
3.888  
3.806  
3.746

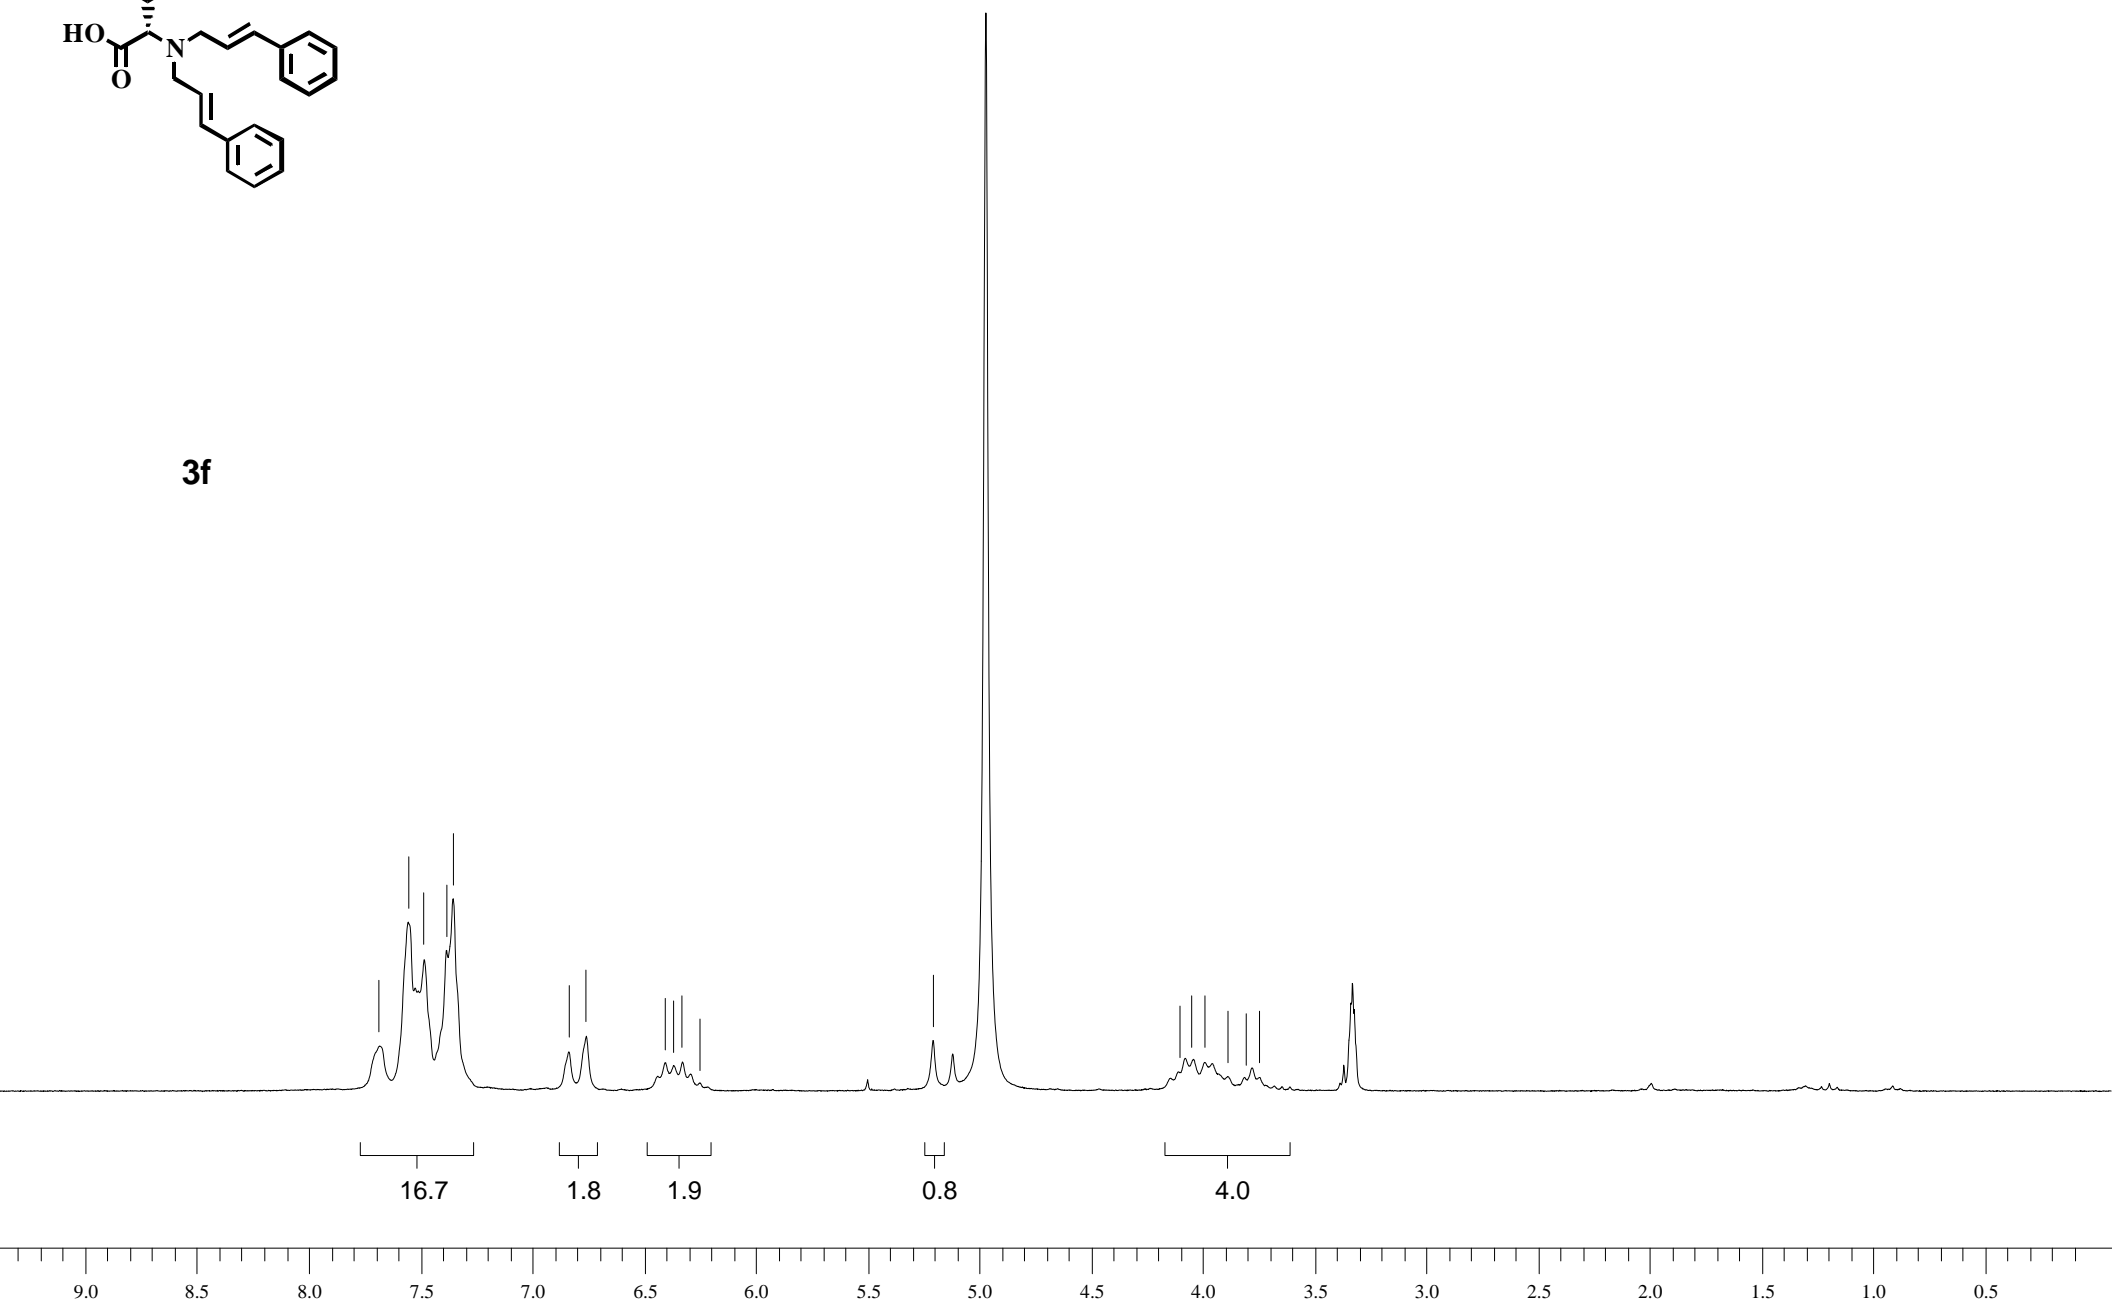

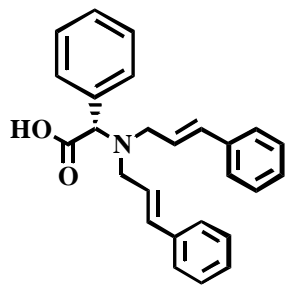

3f

178.070

141.874  
140.150  
136.698  
131.916  
131.457  
130.128  
129.867  
128.165  
118.932  
117.292

70.632

55.627

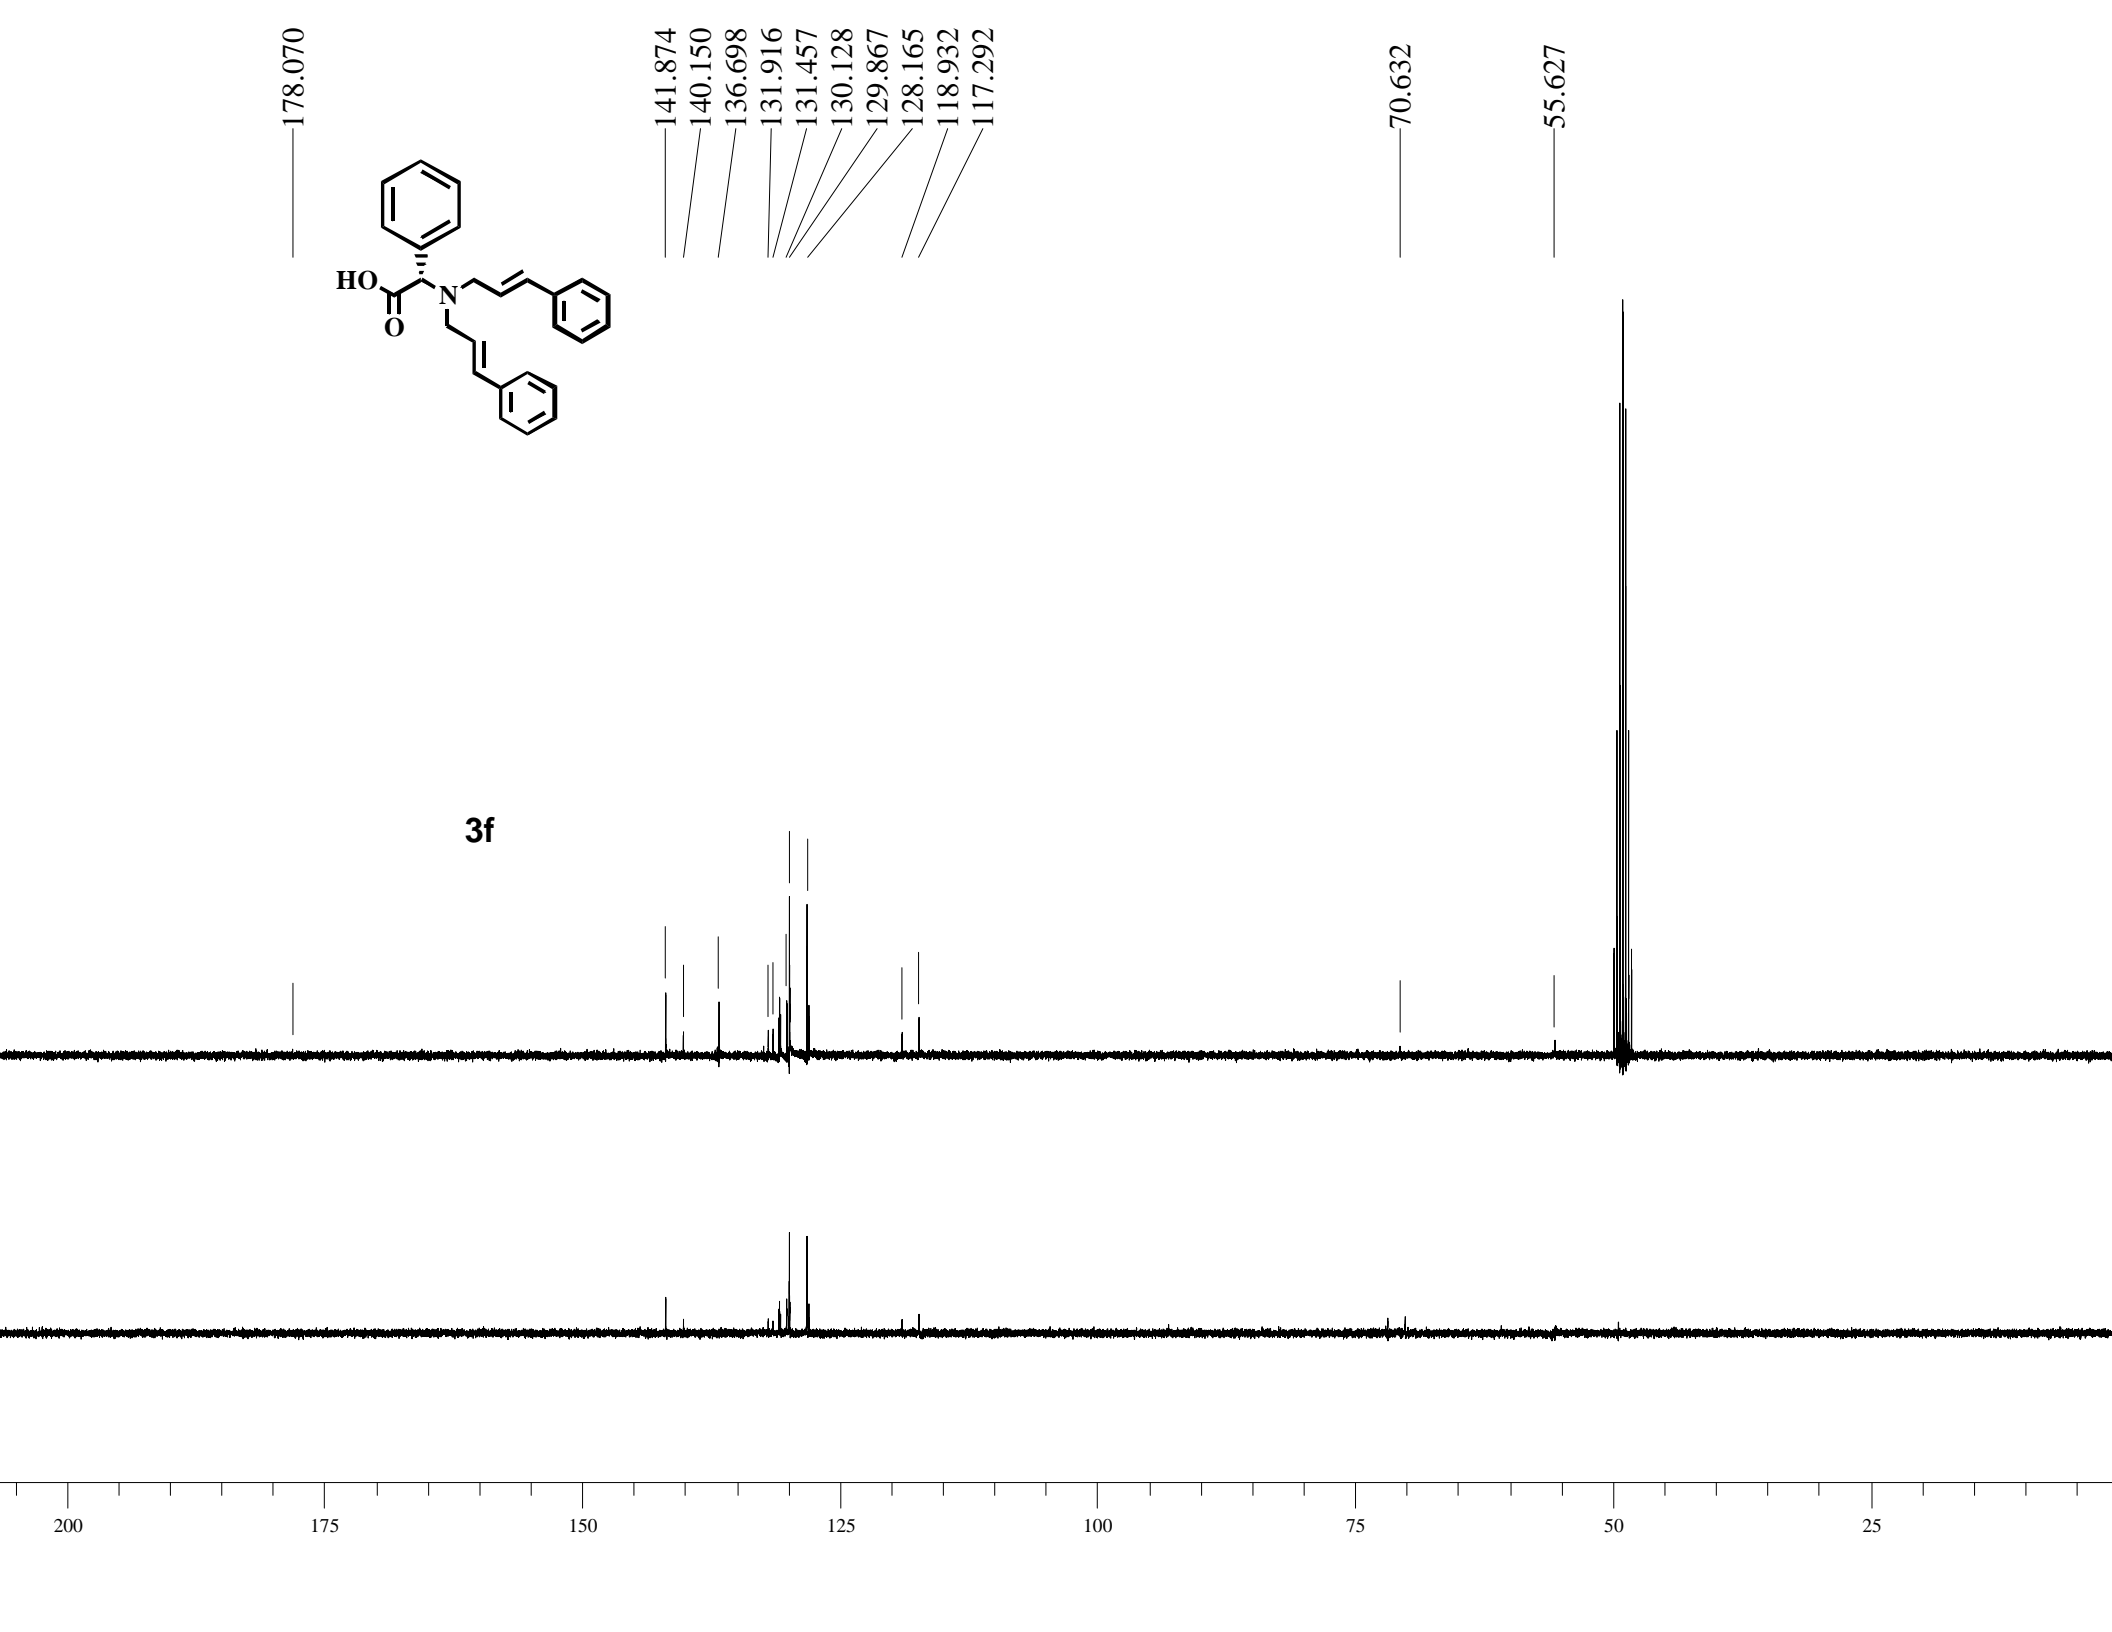

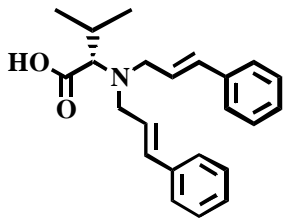

3g

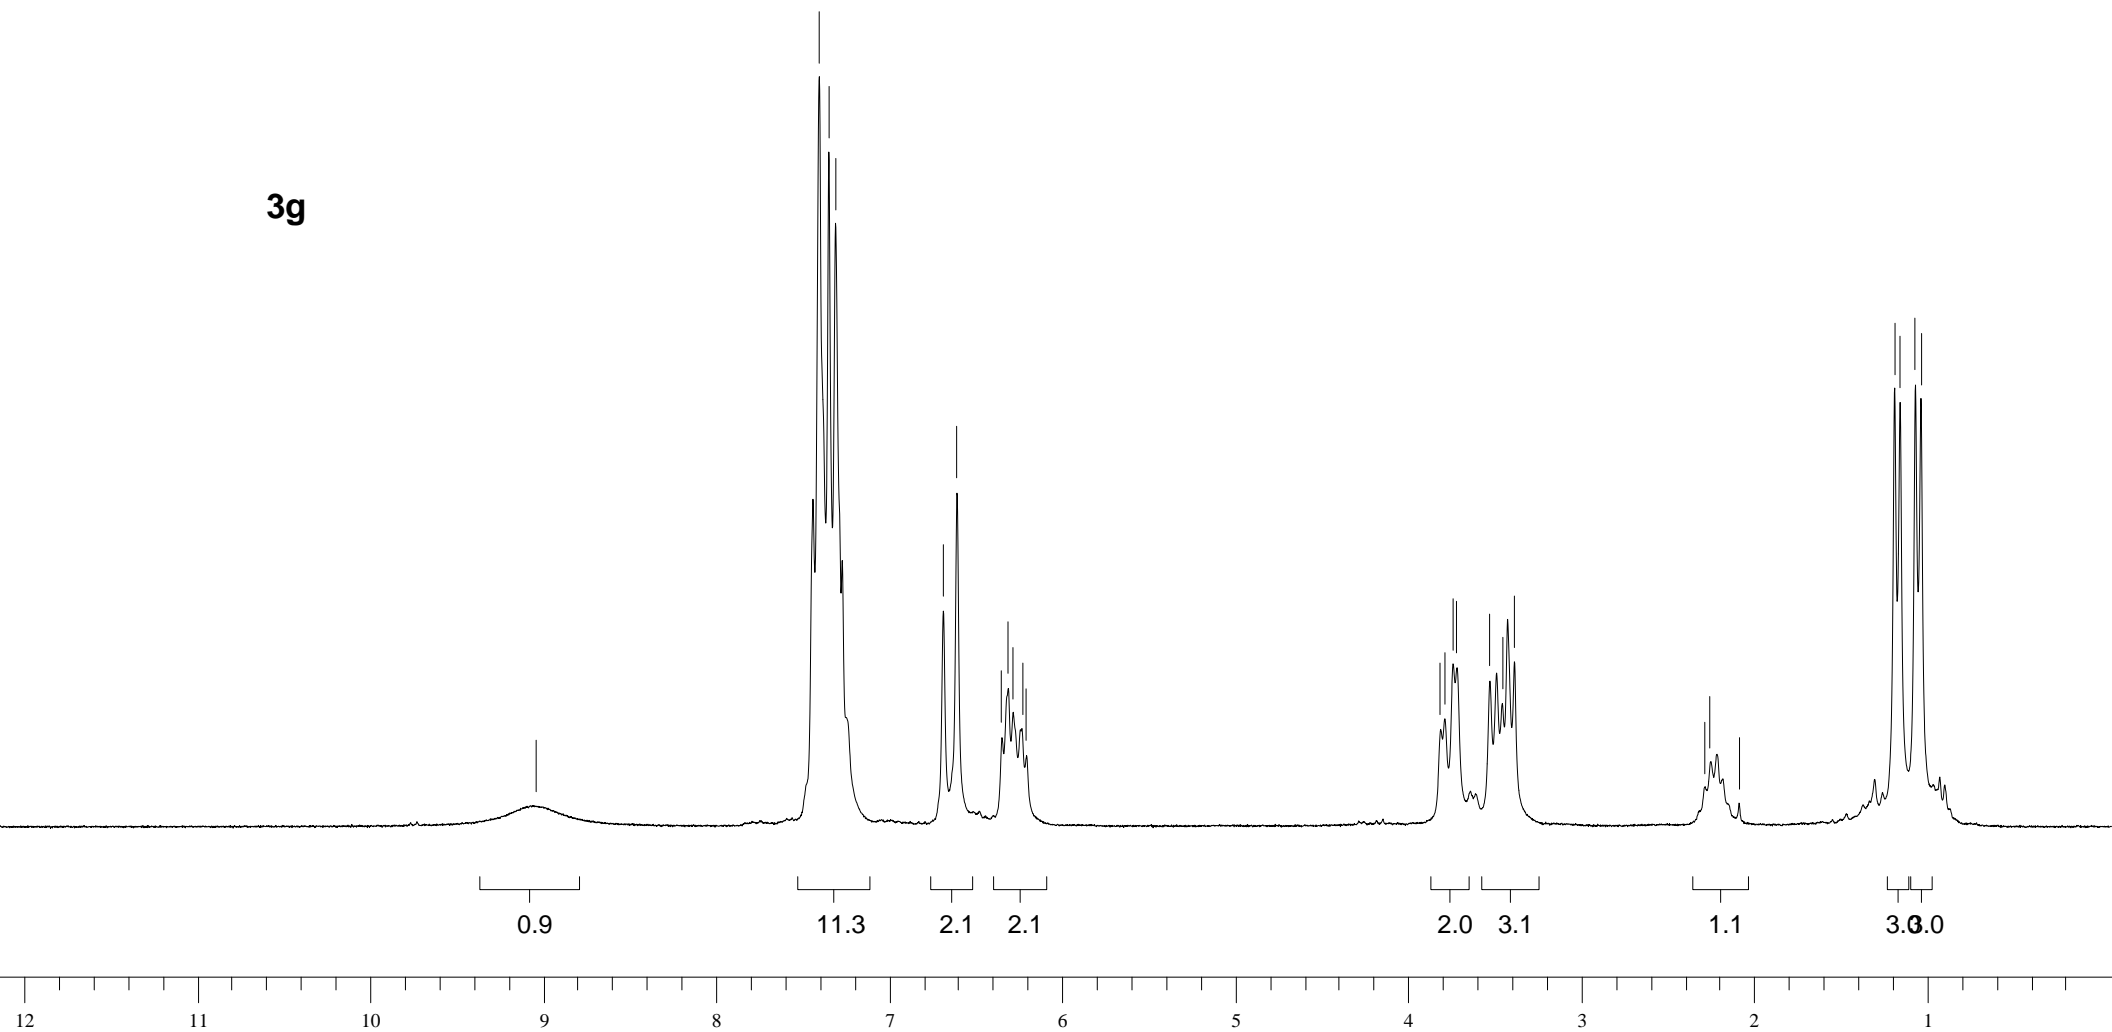

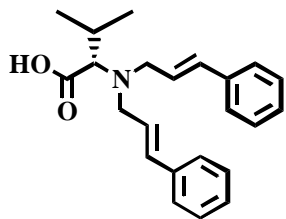

3g

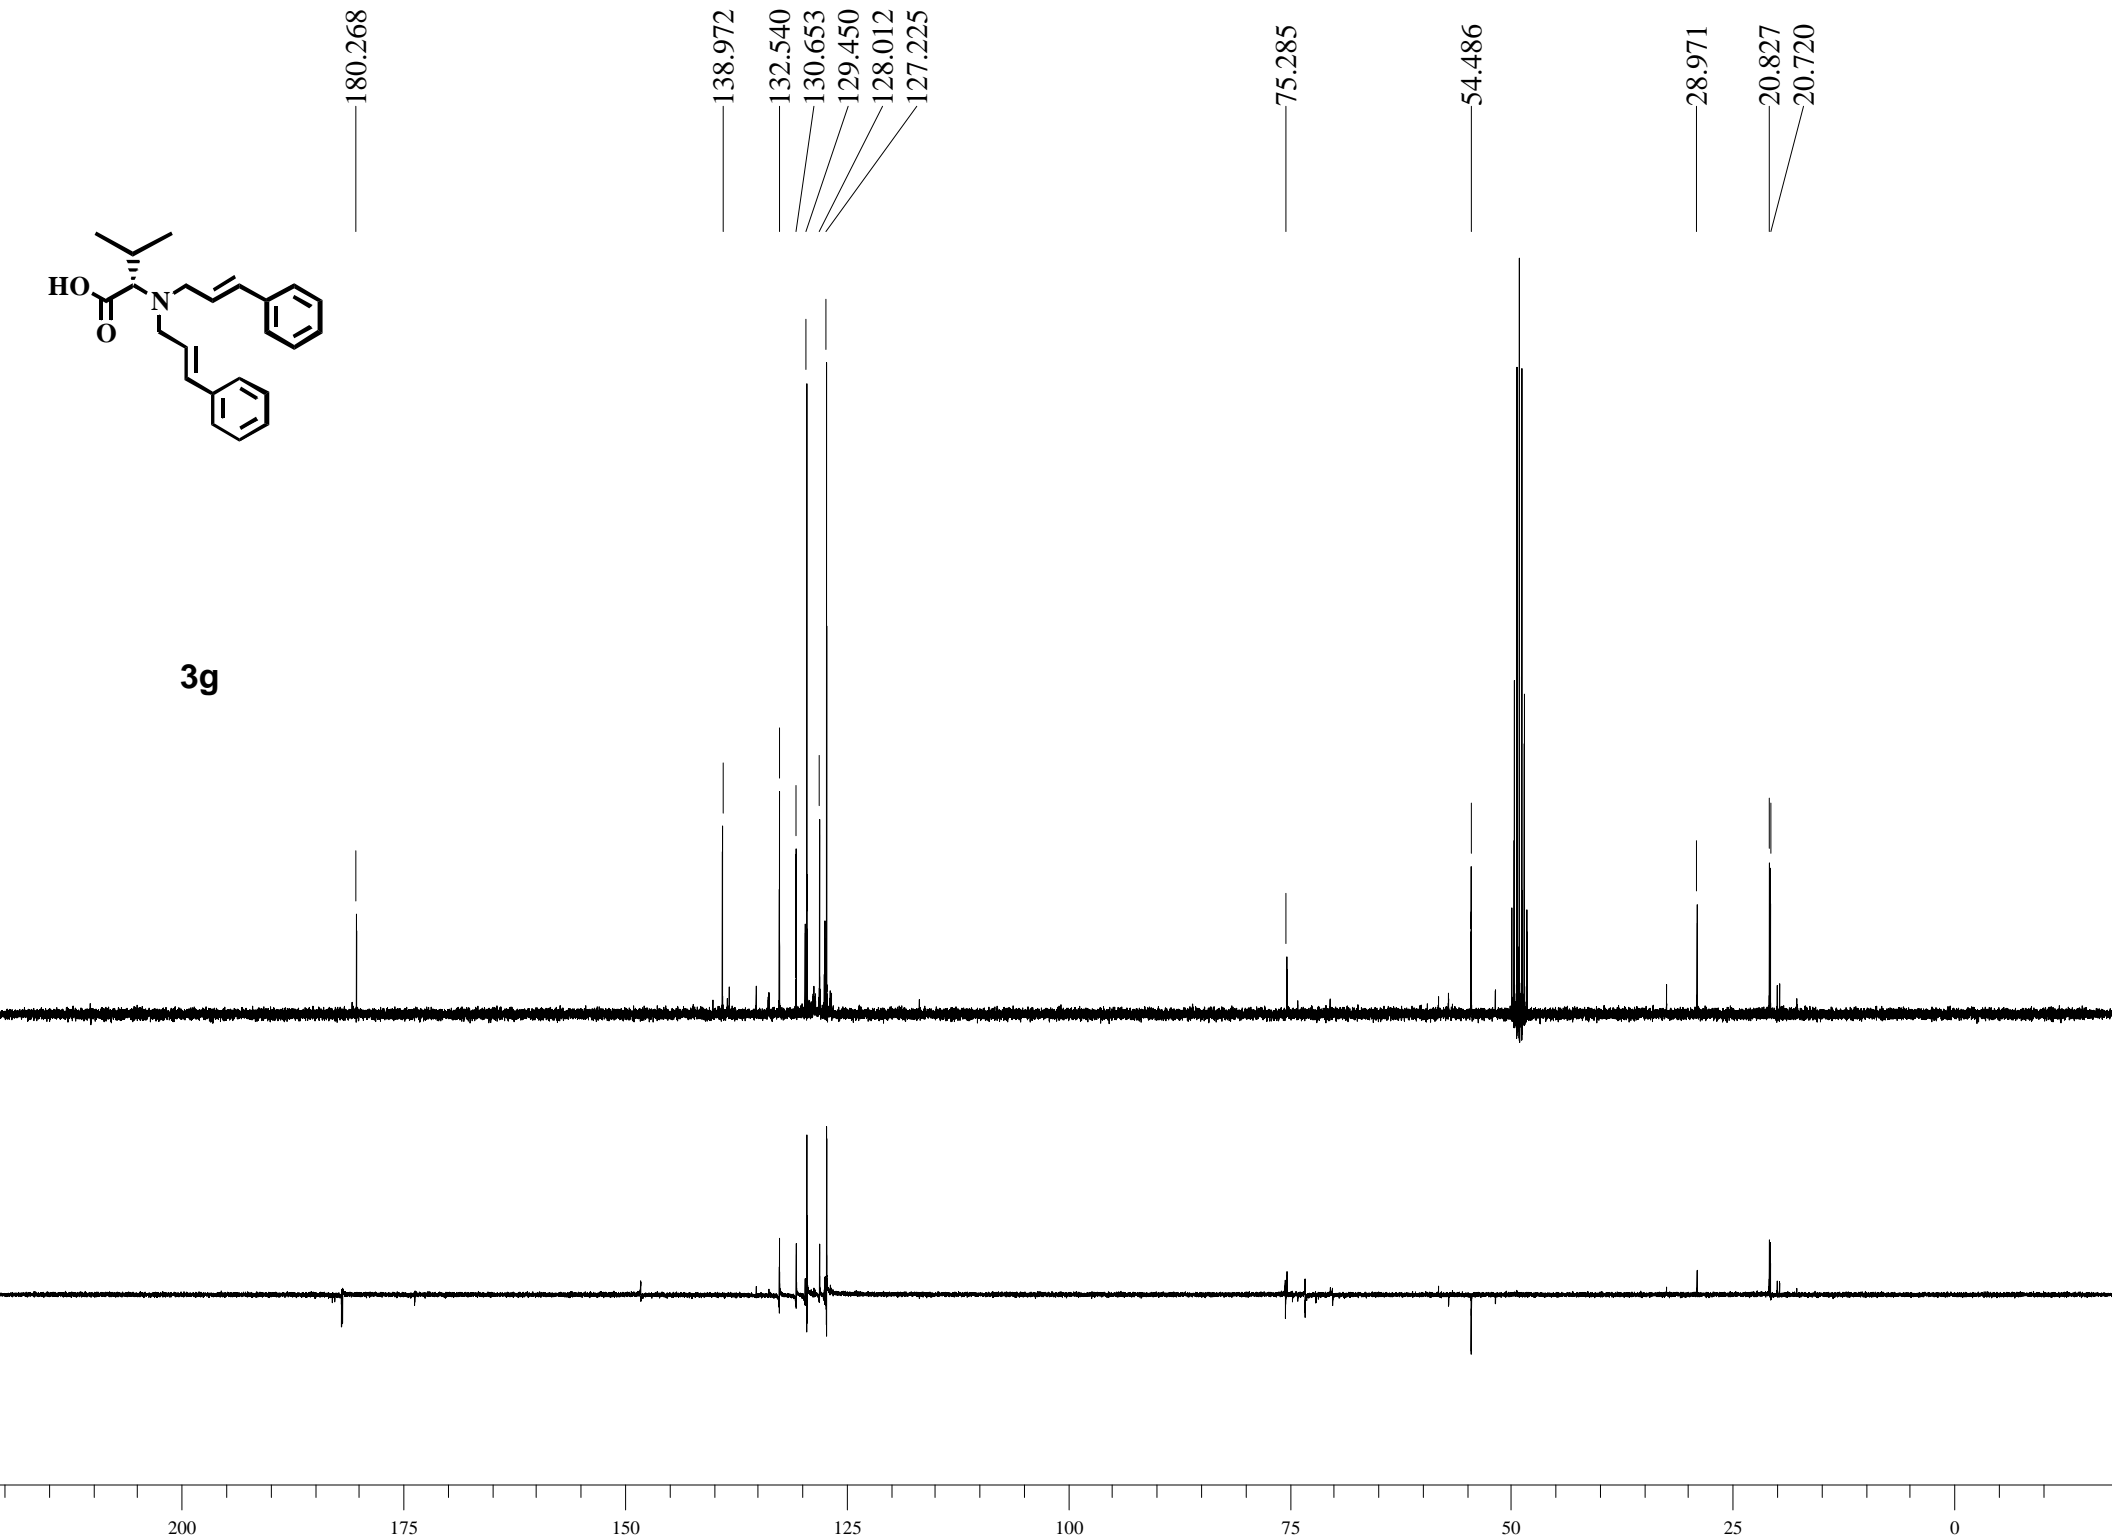

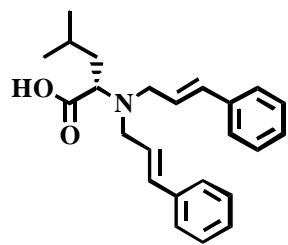

7.422  
7.379  
7.328  
7.295  
7.257  
7.194  
6.580  
6.500  
6.306  
6.278  
6.163

3.537  
3.512  
3.461  
3.430  
3.342  
3.232

1.801  
1.736  
1.601  
1.508  
1.366

0.879  
0.845  
0.812

3h

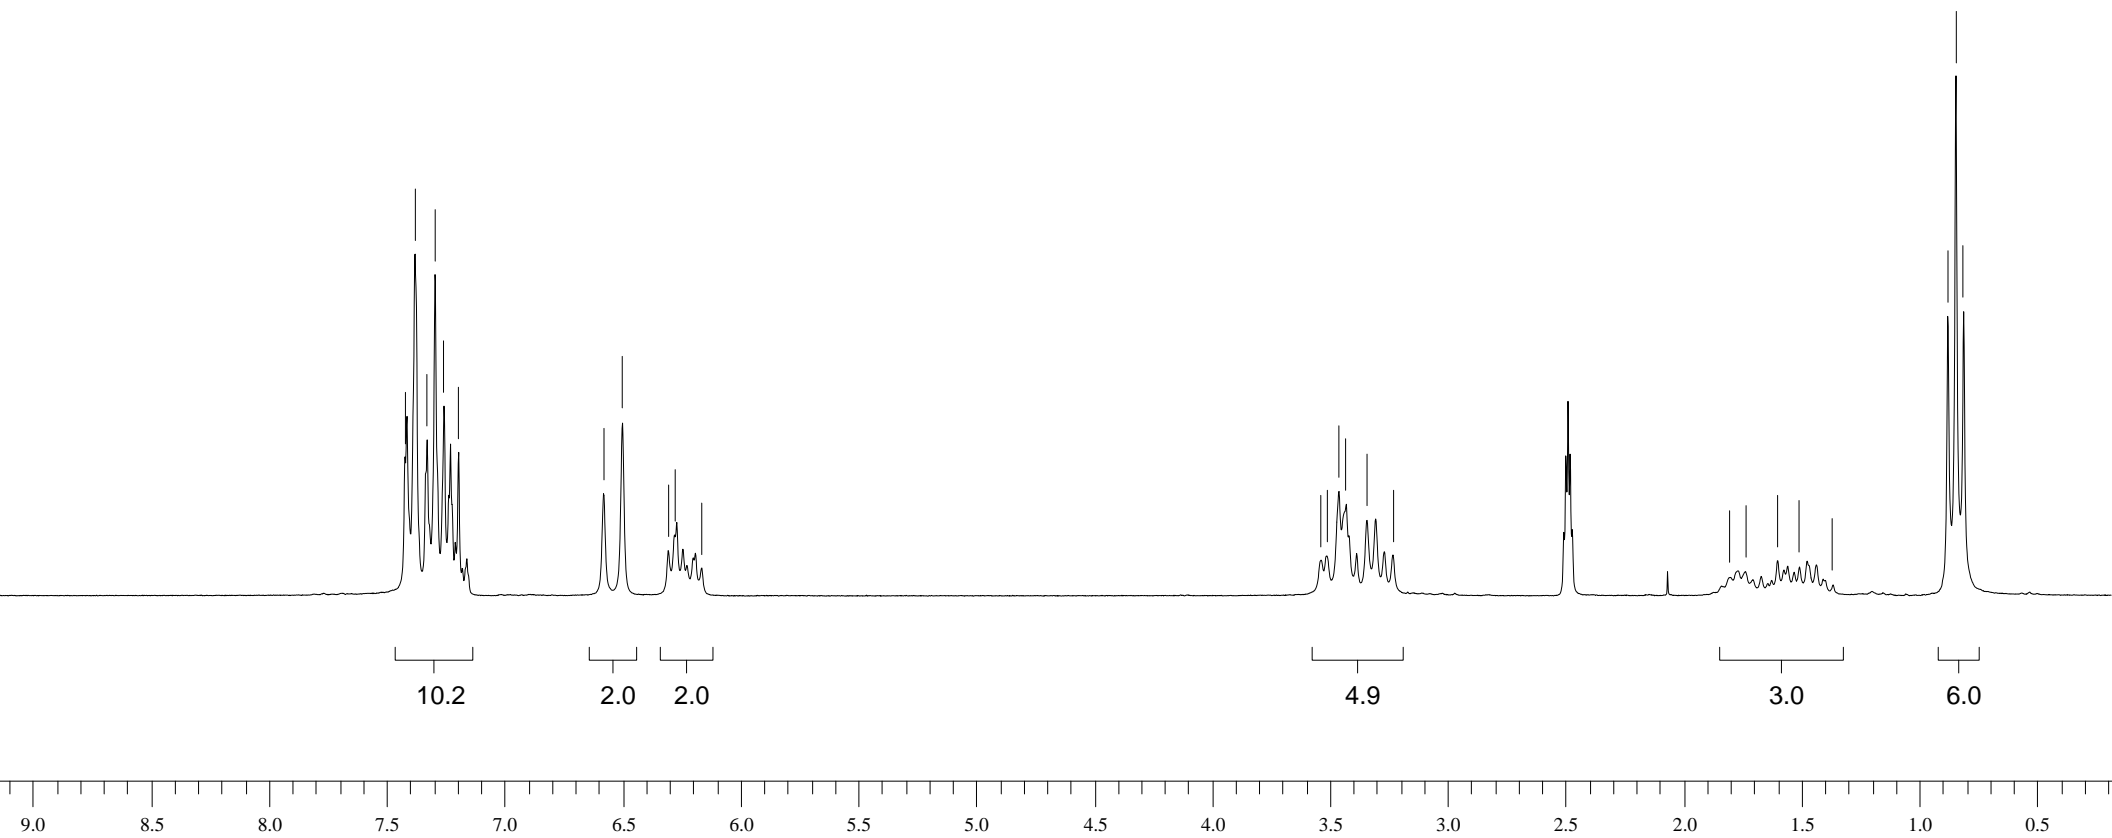

174.514

136.722

131.239

128.456

127.174

126.020

59.638

52.450

38.114

24.077

22.873

21.583

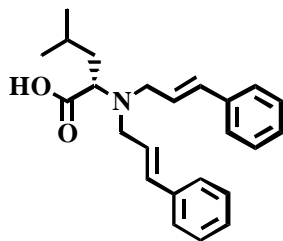

3h

180 170 160 150 140 130 120 110 100 90 80 70 60 50 40 30 20 10



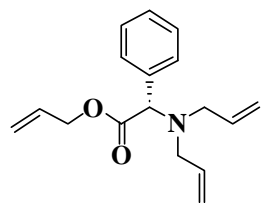

4a

7.399  
7.362  
7.331

5.952  
5.905  
5.870  
5.835  
5.786  
5.753  
5.334  
5.240  
5.181  
5.137  
4.669

3.263  
3.234

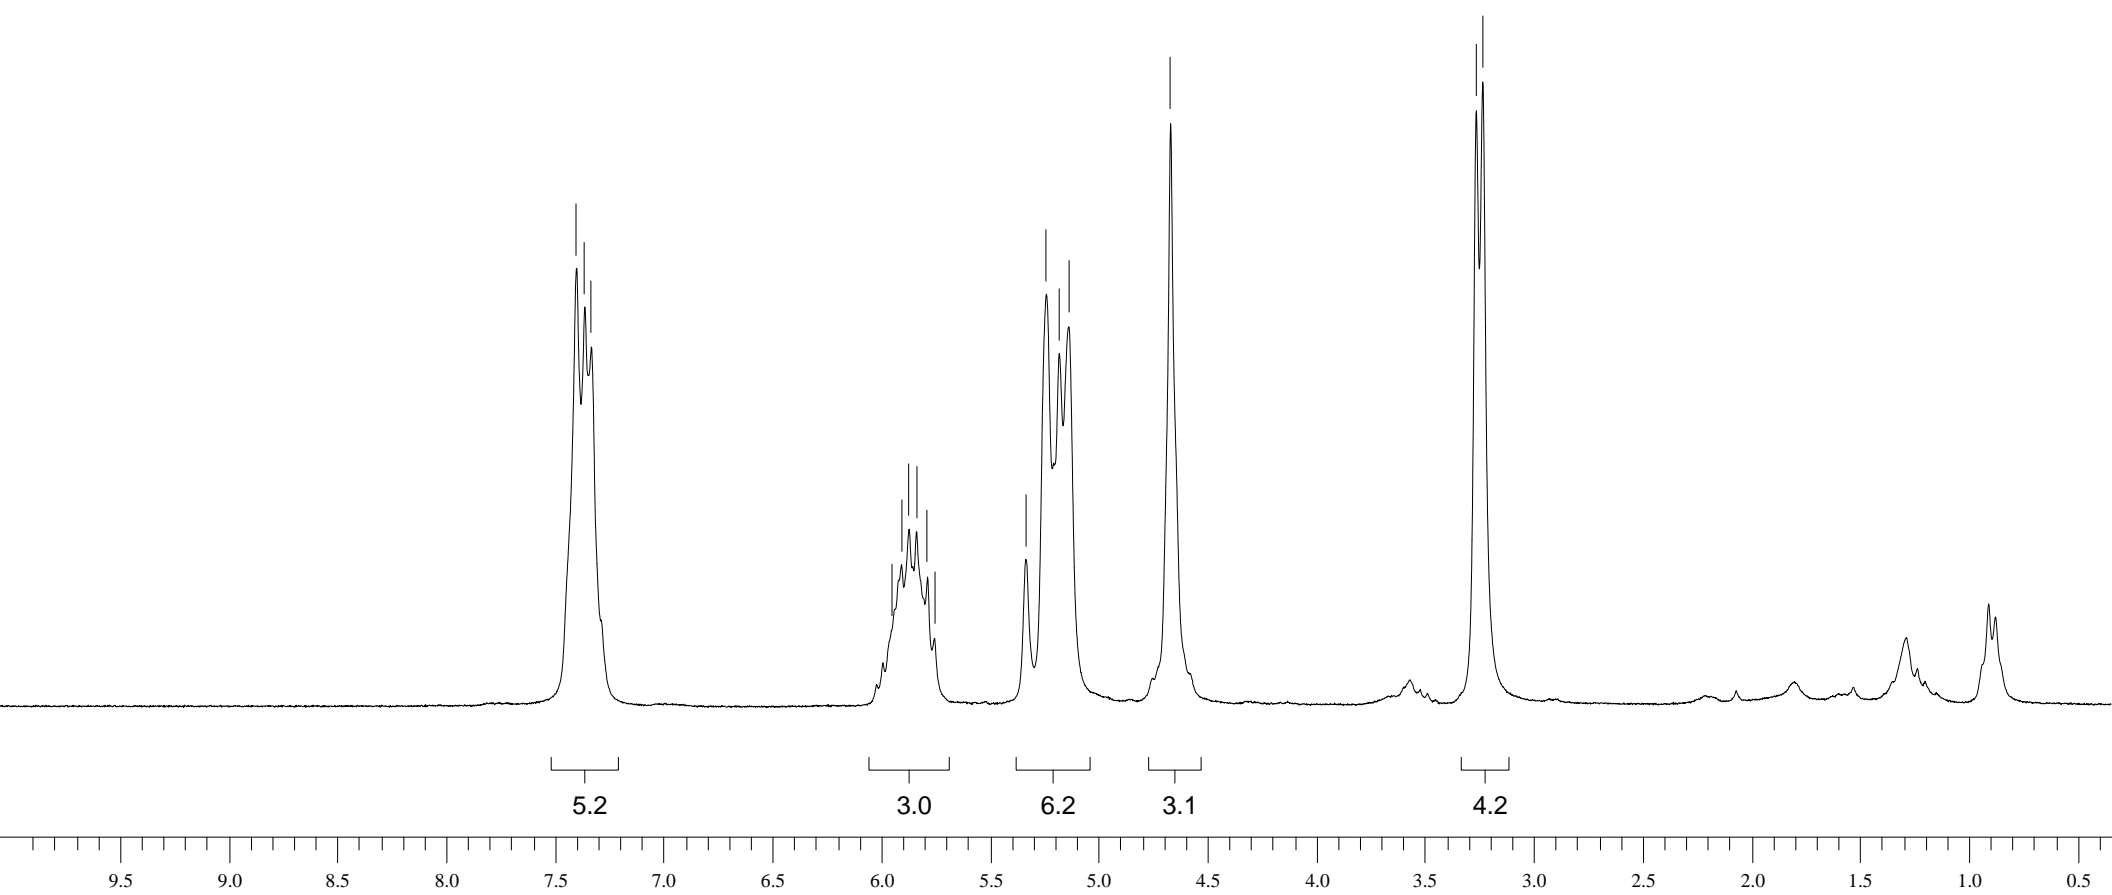

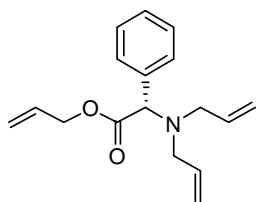

4a

171.776

136.597

135.596

131.908

128.649

128.326

127.887

118.468

117.543

67.587

65.074

53.146

200

175

150

125

100

75

50

25

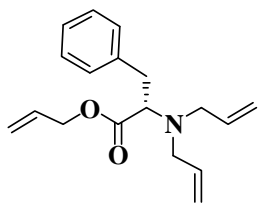

7.229  
7.192  
7.158

5.953  
5.856  
5.770  
5.675  
5.589  
5.278  
5.185  
5.103  
5.055

4.558  
4.530

3.780  
3.742  
3.704  
3.442  
3.417  
3.369  
3.345  
3.153  
3.117  
3.060  
3.020  
2.945  
2.841

4b

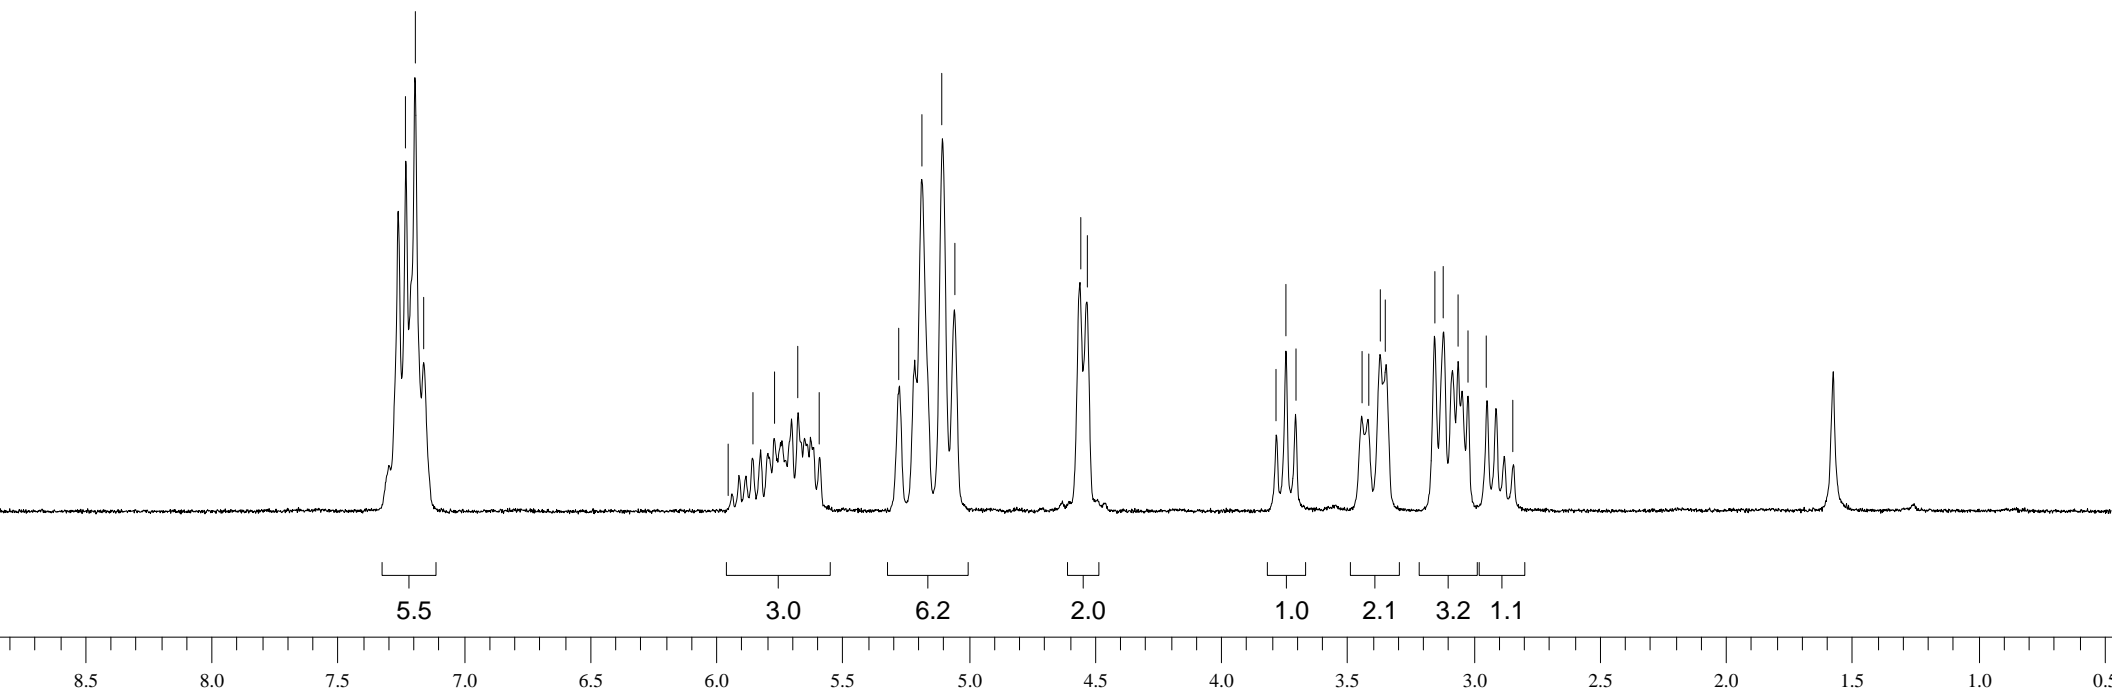

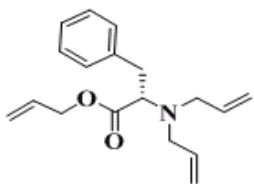

171.879

138.294  
136.170  
131.978  
129.187  
127.970  
126.057  
118.010  
116.948

64.576  
63.627

53.315

35.712

4b

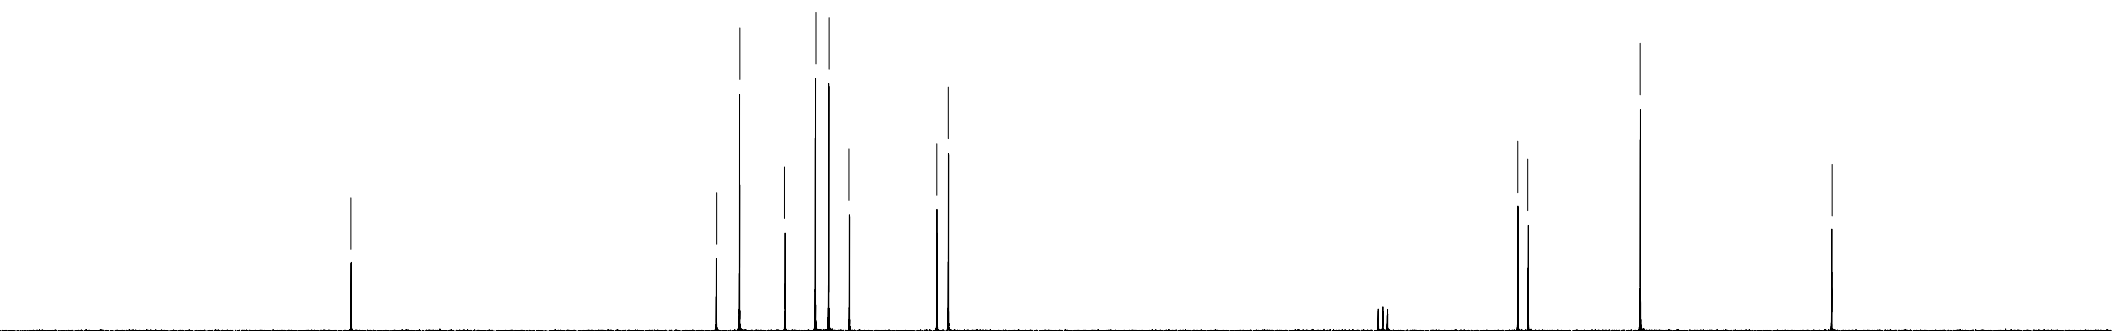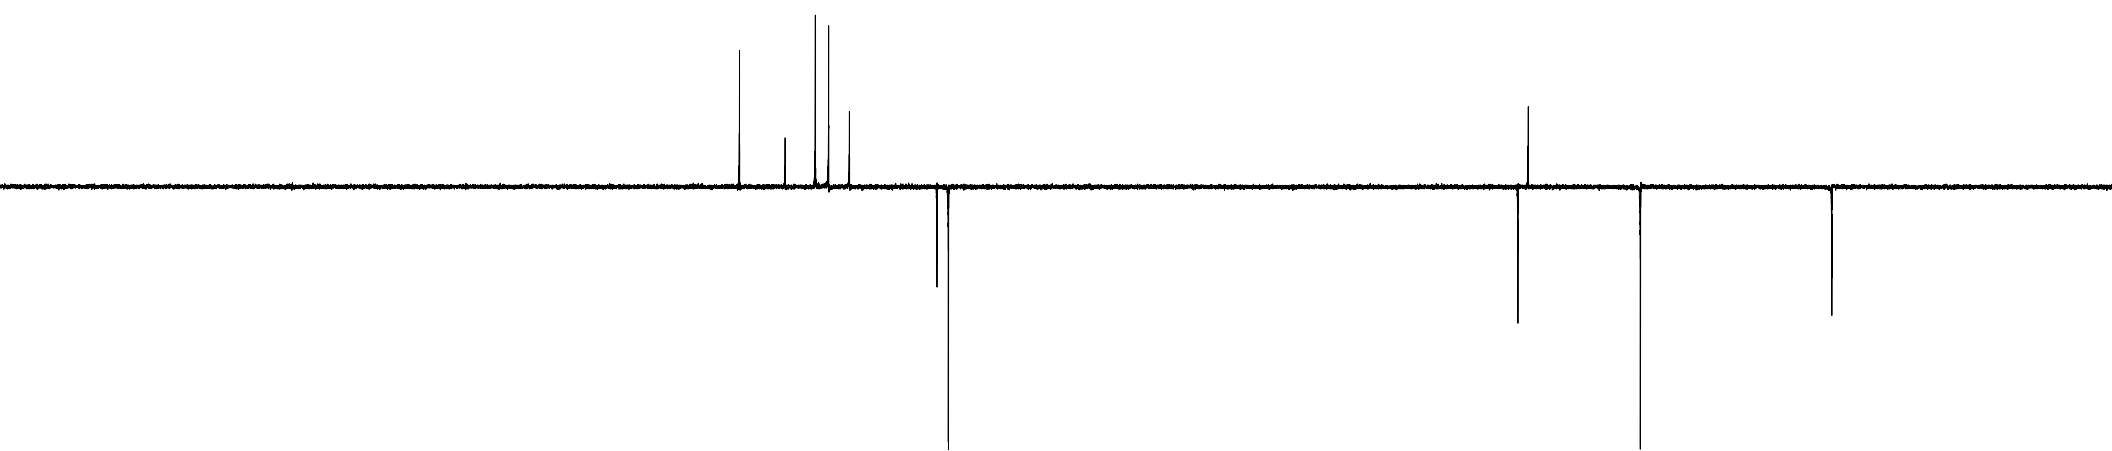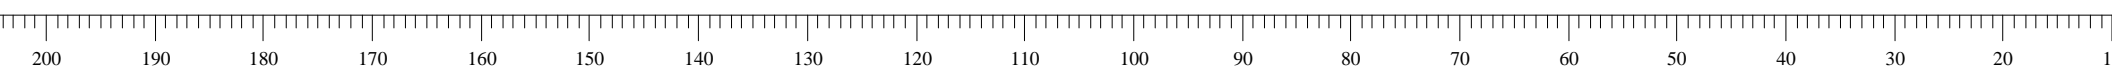

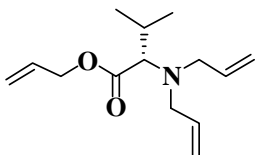

4c

6.043  
5.962  
5.876  
5.764  
5.695  
5.656  
5.391  
5.271  
5.221  
5.072  
4.625  
4.596

3.463  
3.452  
3.389  
3.369  
3.013  
2.960  
2.908  
2.868  
2.835  
2.795  
2.131  
2.098  
2.032  
1.980  
1.947

0.978  
0.945  
0.877  
0.844

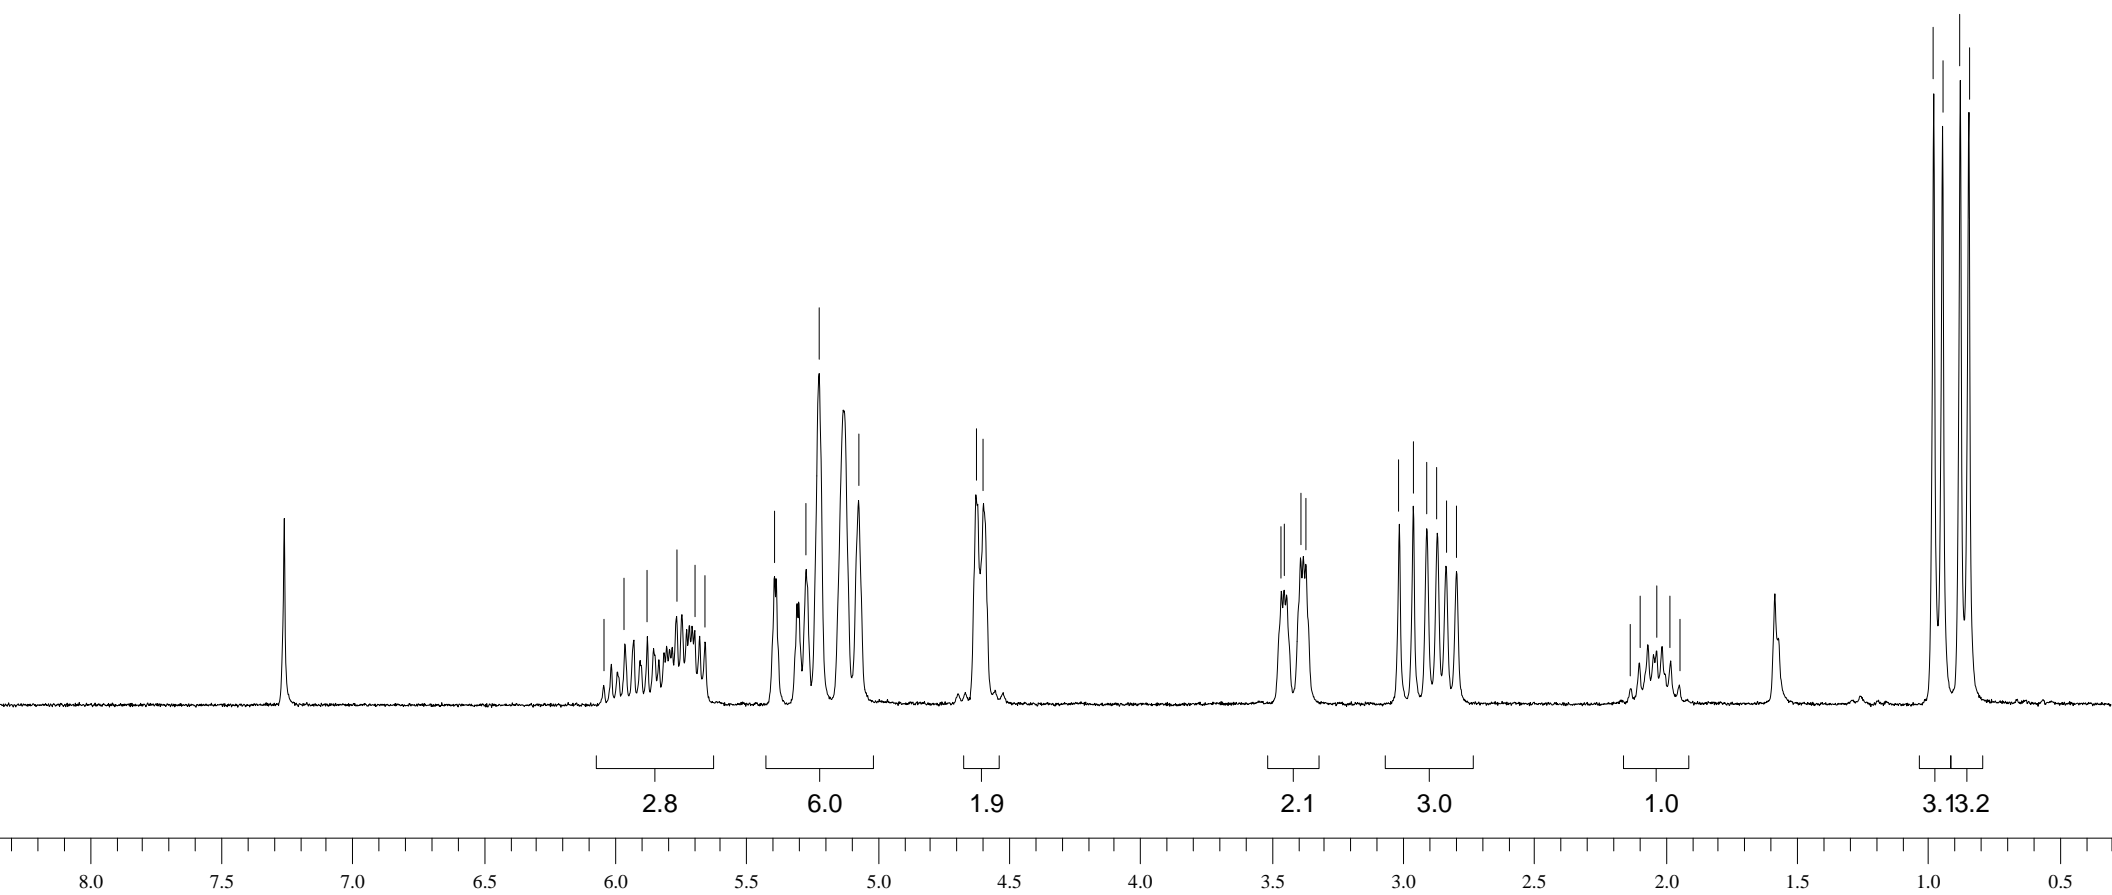

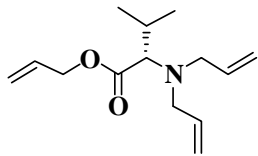

4c

171.850

136.473

132.281

118.186

116.694

68.636

64.228

53.155

27.472

19.751

19.374

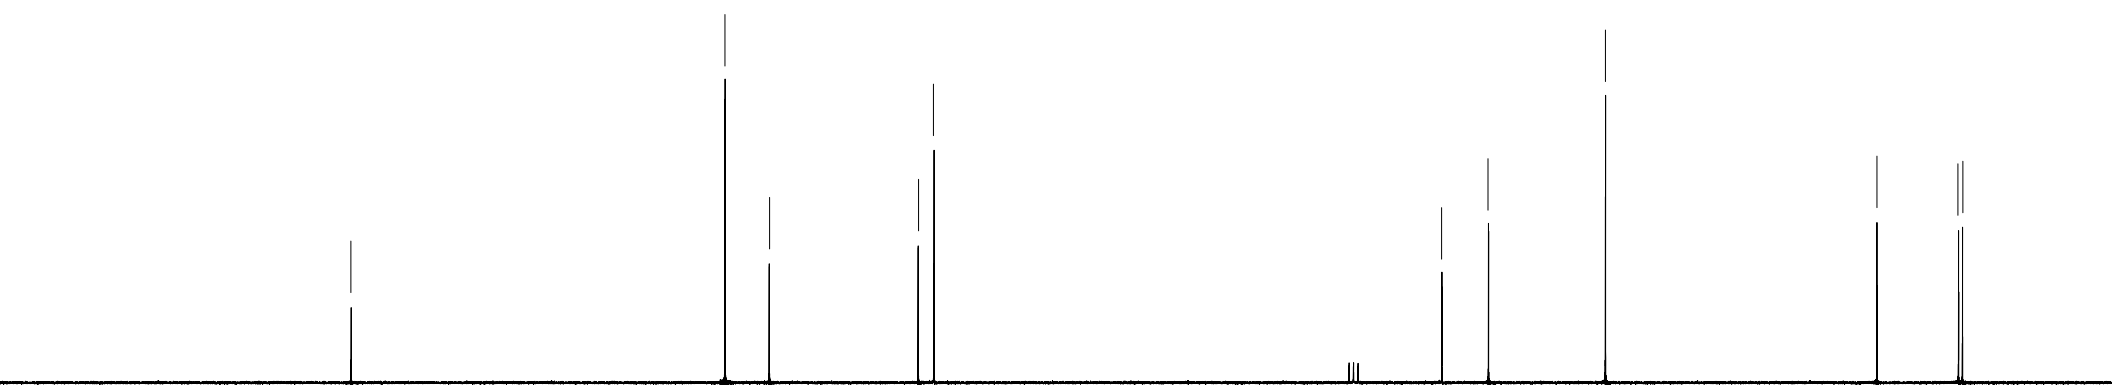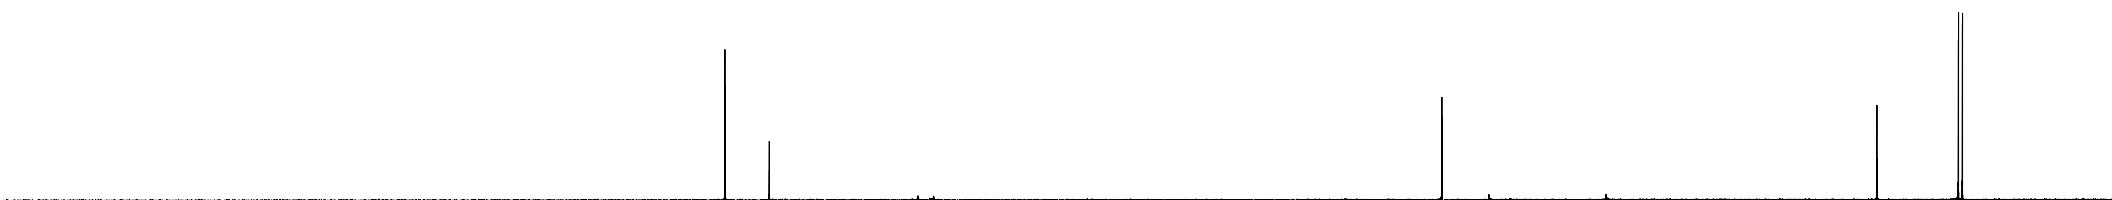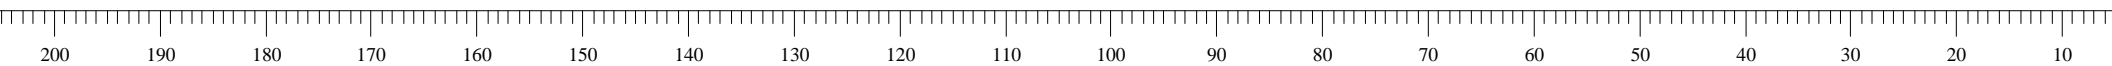

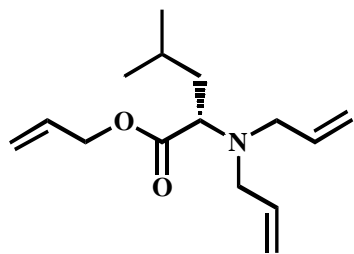

6.001  
5.914  
5.832  
5.783  
5.671  
5.375  
5.282  
5.214  
5.125  
5.068  
4.604  
4.576

3.574  
3.536  
3.497  
3.410  
3.393  
3.336  
3.315  
3.090

1.780  
1.716  
1.649  
1.565  
1.528  
0.917  
0.886  
0.855

4d

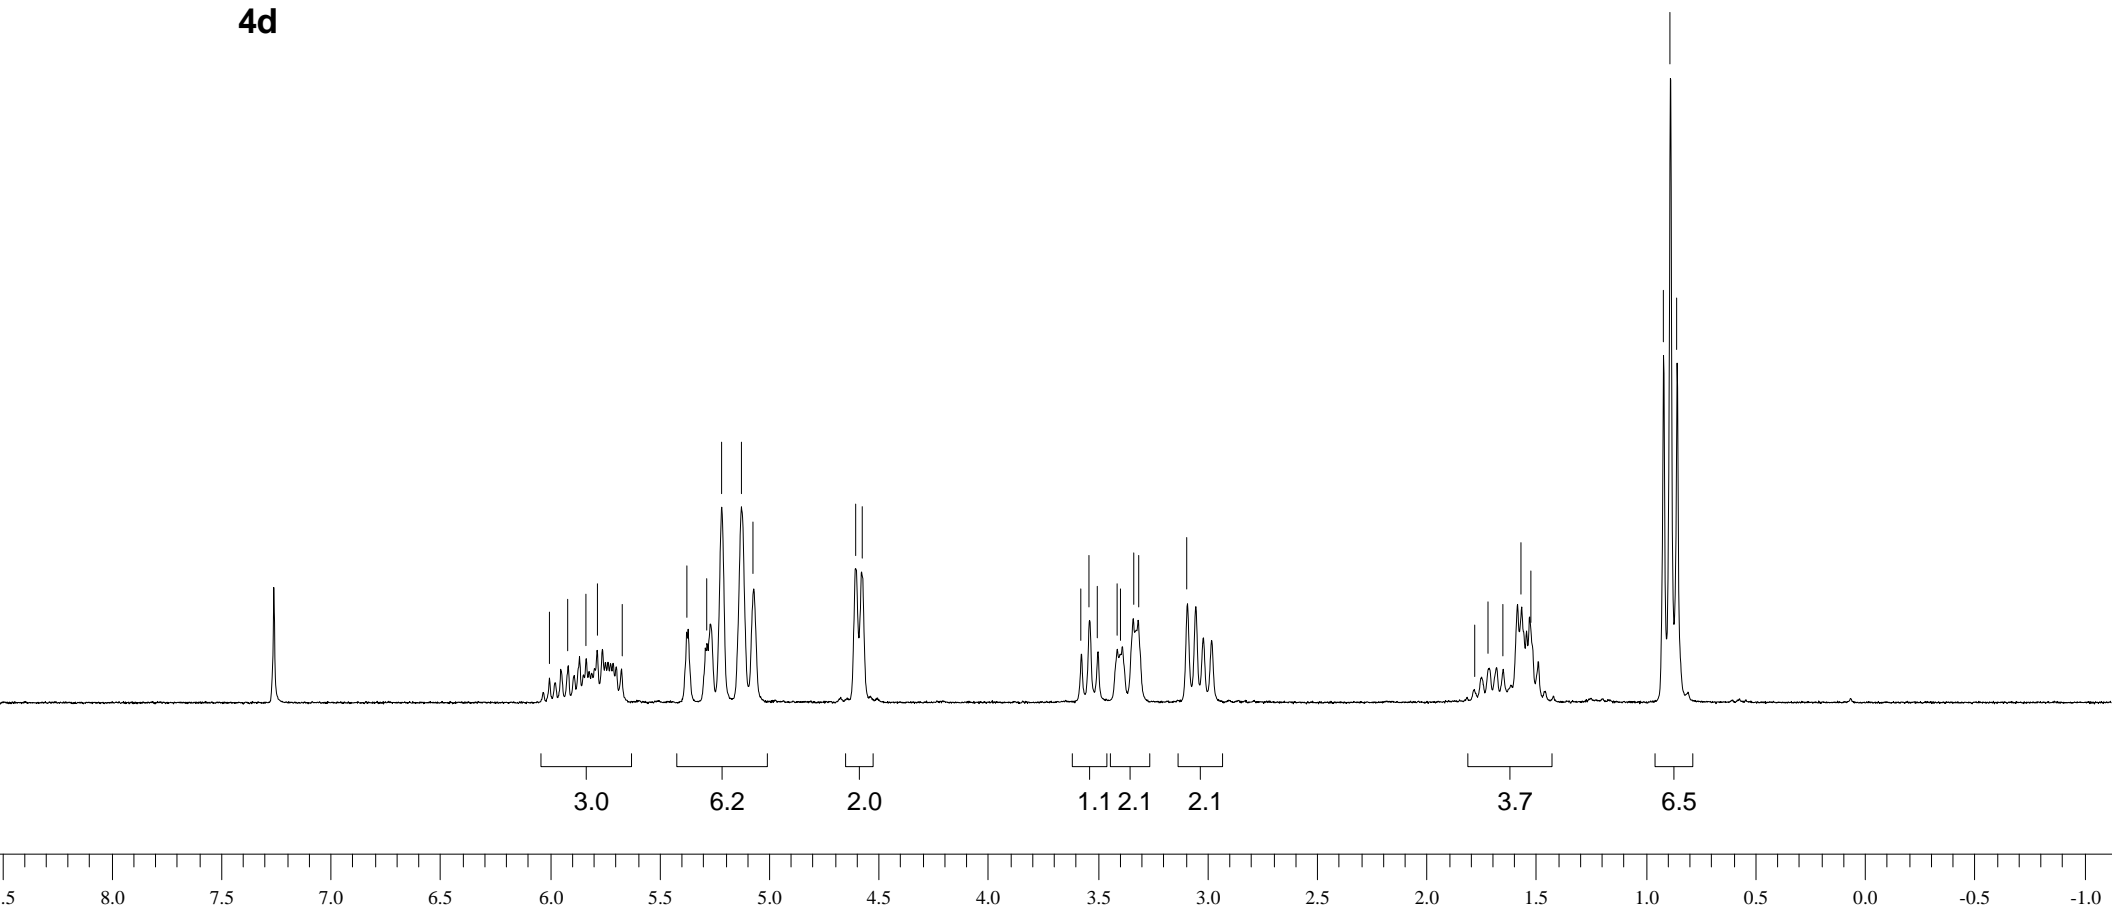

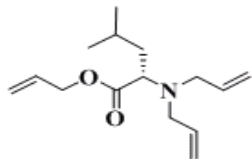

4d

172.996

136.606

132.228

117.945

116.653

64.380

59.669

53.249

38.542

24.420

22.853

21.753

200

175

150

125

100

75

50

25

0



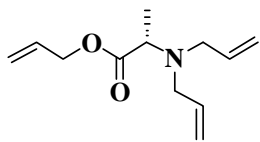

4e

6.024  
5.944  
5.859  
5.789  
5.737  
5.705  
5.364  
5.224  
5.130  
5.076  
4.609  
4.582

3.679  
3.644  
3.607  
3.572  
3.333  
3.260  
3.189  
3.082

1.298  
1.263

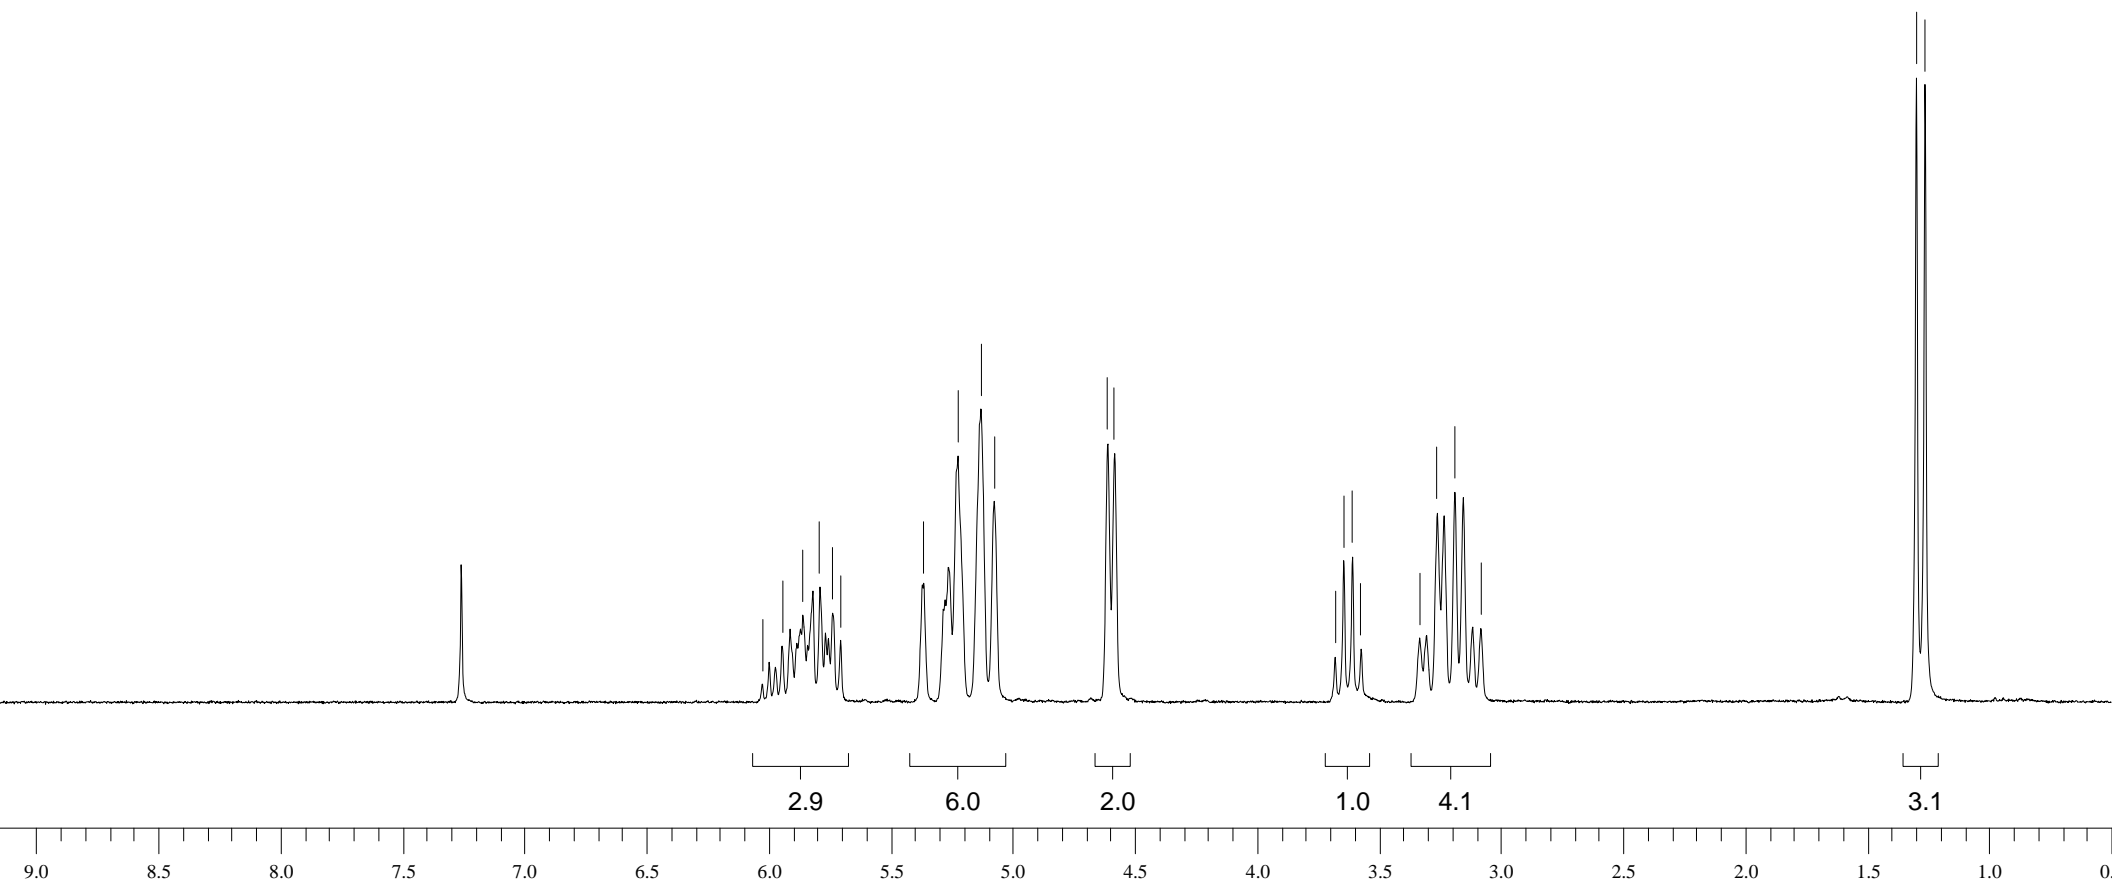

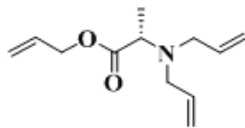

4e

173.032

136.310

132.033

117.794

116.598

64.415

56.906

53.194

14.694

200

175

150

125

100

75

50

25

0

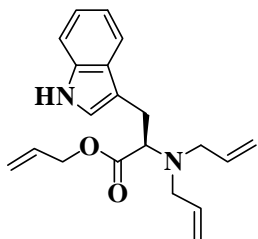

4f

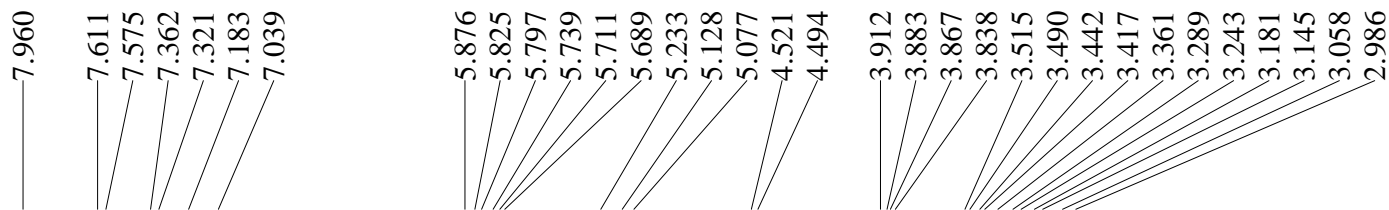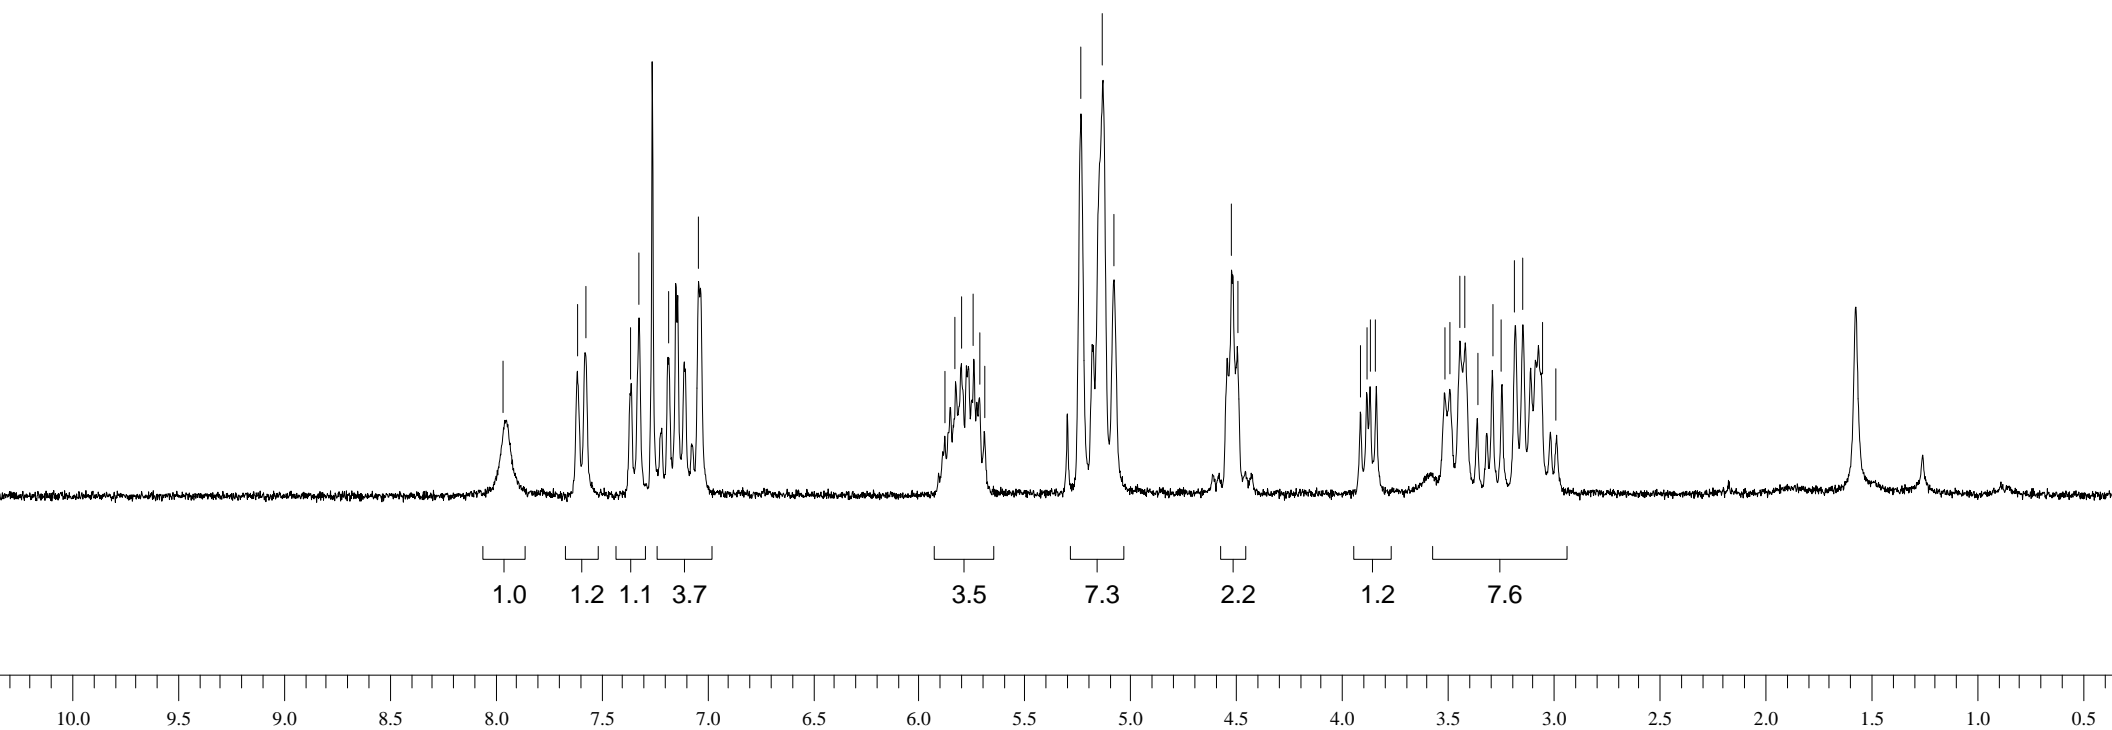

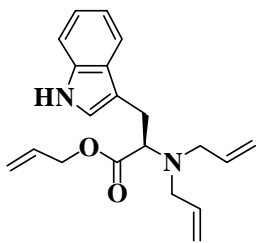

172.430

136.306  
136.017  
132.039  
127.439  
122.741  
121.715  
119.124  
118.643  
118.058  
117.192  
112.047  
111.005

64.667  
62.941

53.545

25.560

4f

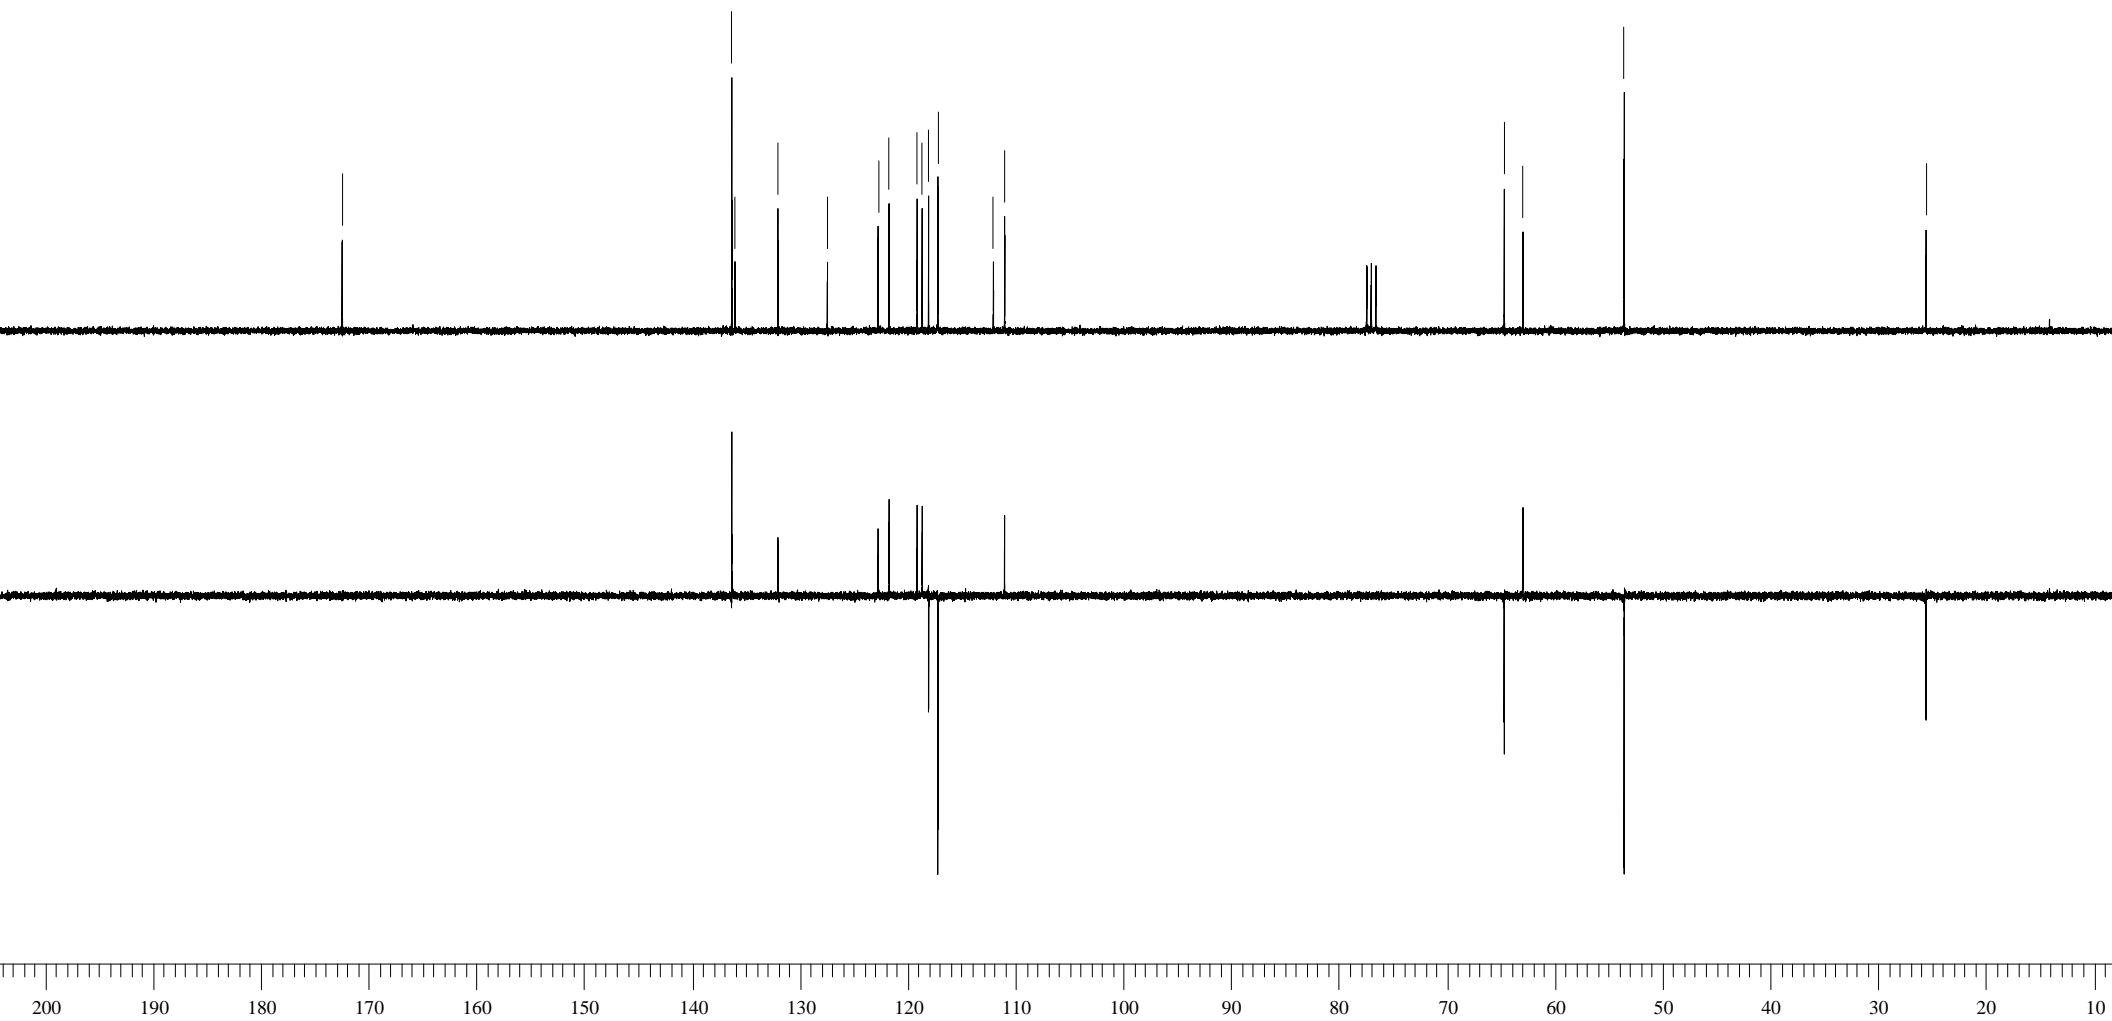

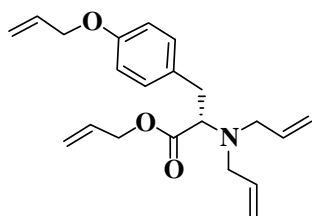

4g

7.100  
7.057  
6.830  
6.789  
6.148  
6.070  
5.982  
5.926  
5.823  
5.772  
5.706  
5.596  
5.445  
5.300  
5.186  
5.101  
5.055  
4.653  
4.624  
4.525  
4.492  
3.722  
3.686  
3.645  
3.433  
3.410  
3.362  
3.336  
3.141  
3.104  
3.029  
2.952  
2.879  
2.773

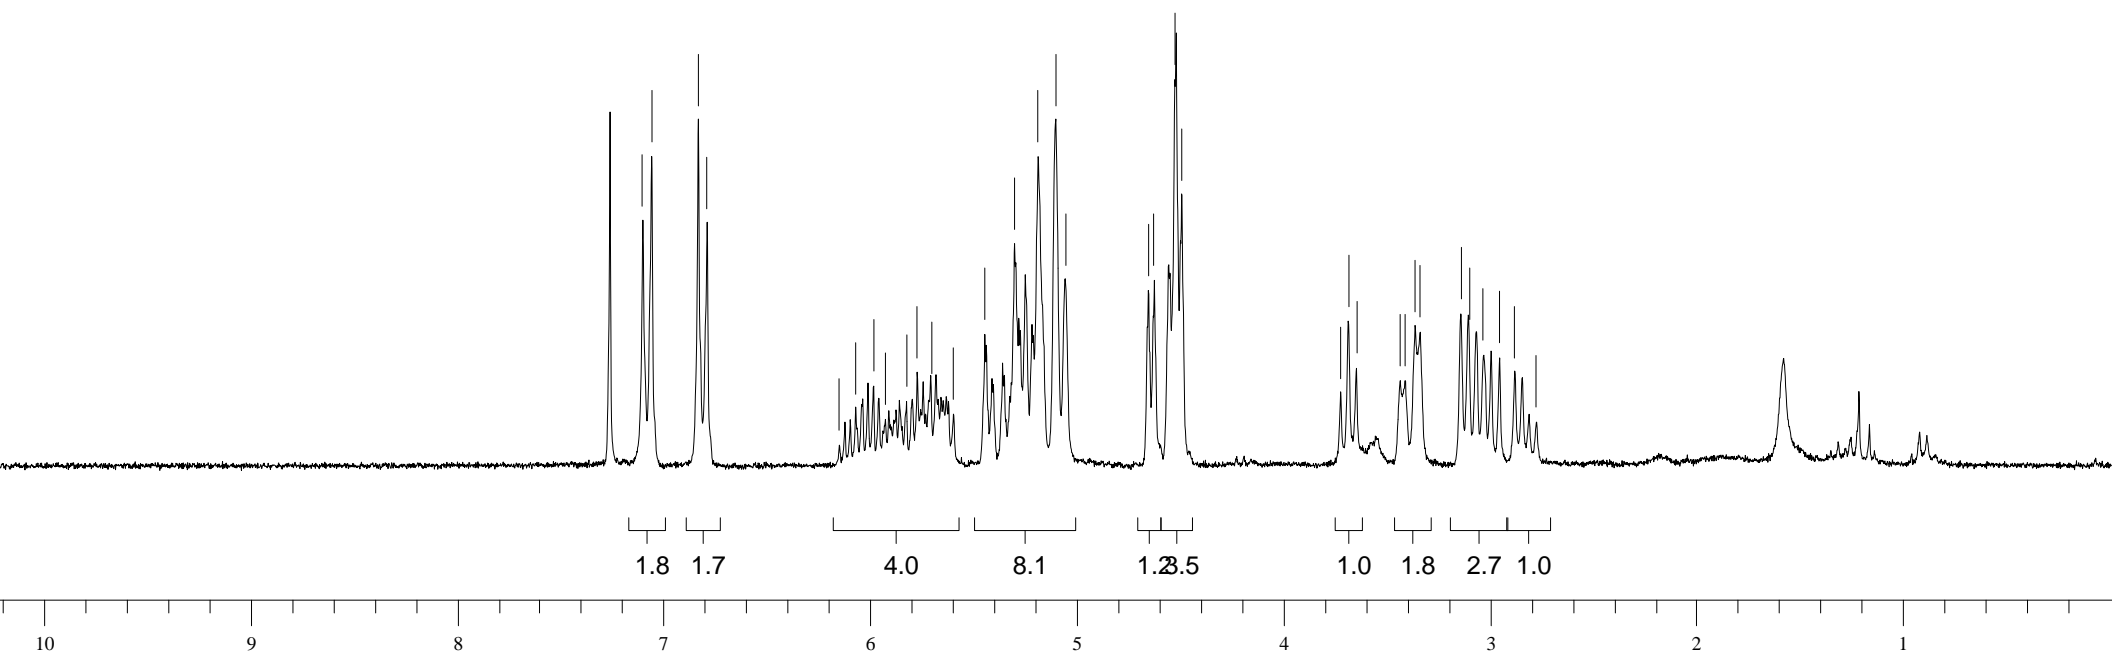

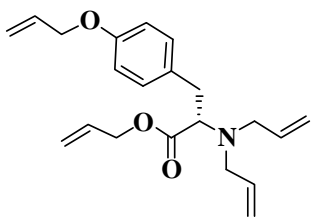

172.115

157.039

136.257

133.373

132.073

130.198

118.139

117.397

117.058

114.371

68.704

64.684

63.950

53.411

34.934

4g

200

175

150

125

100

75

50

25

0

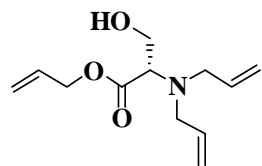

4h

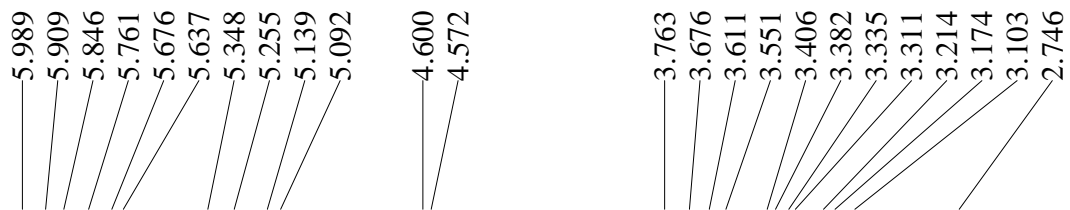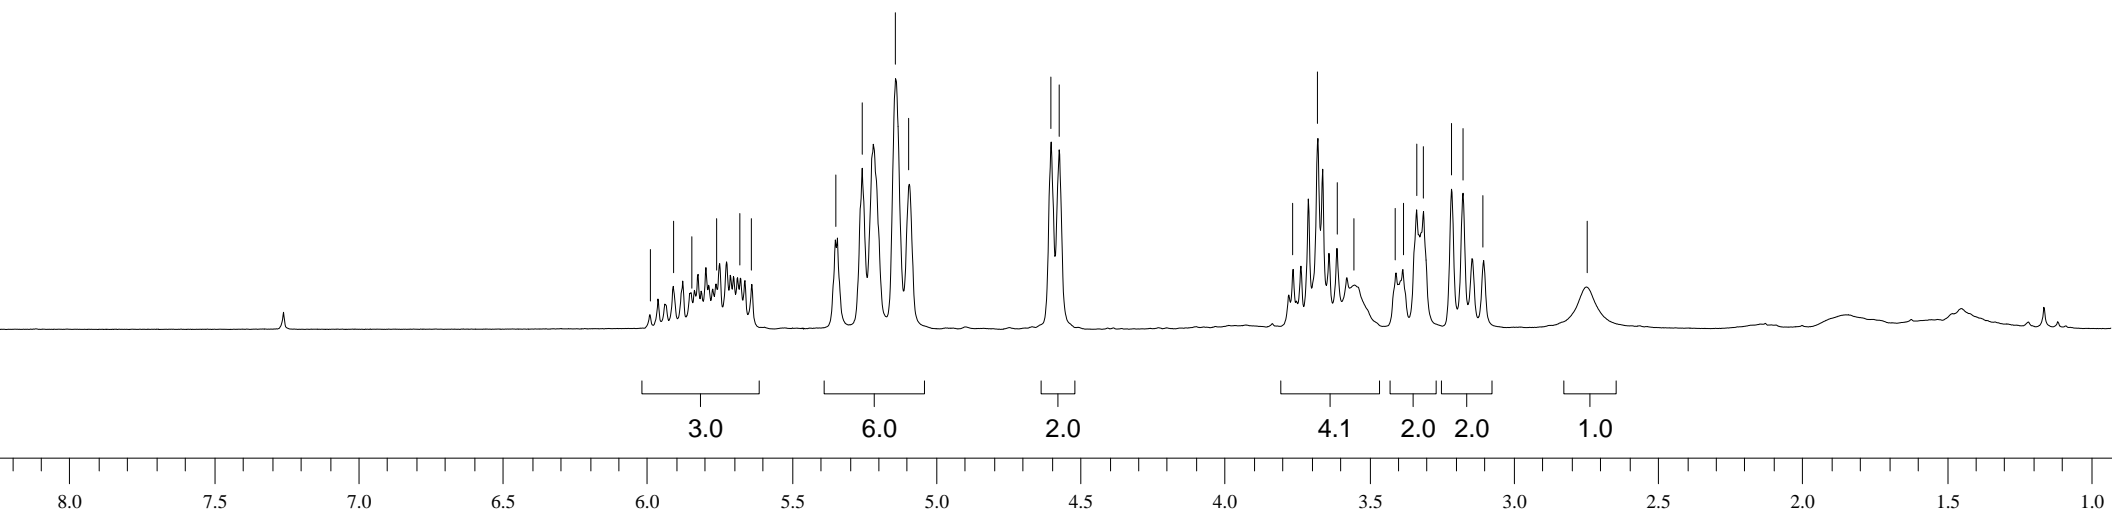

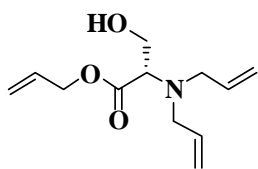

4h

170.803

135.725

131.720

118.549

117.828

64.960

62.458

58.935

53.559

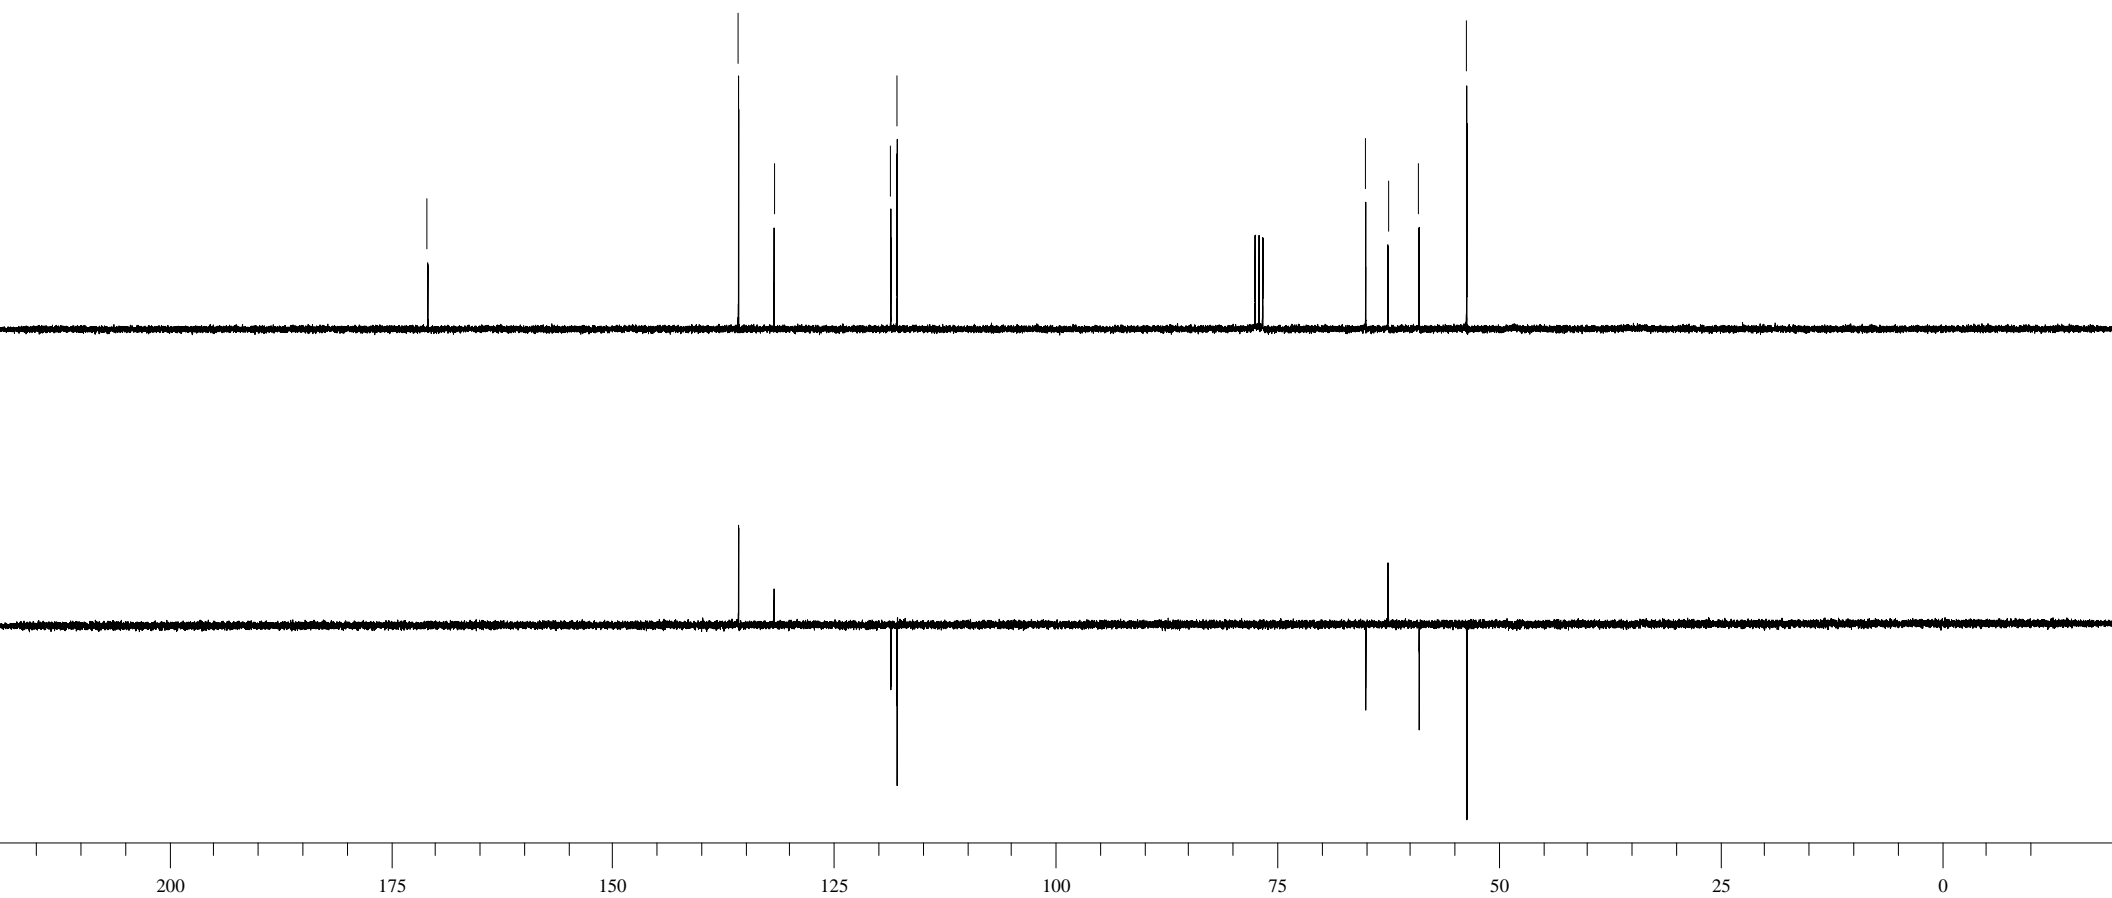

Supplement: b911097f.pdf [file b911097f.pdf]
